# Supplementary material
Source: publisher site journal article supplement (https://www.dovepress.com/get_supplementary_file.php?f=495422.xlsx)
Supplement: Supplementary file 1 [file get_supplementary_file.php]

## Sheet: Supplementary Table 01
Table S1. Pleiotropic loci between ischemic stroke and OSA identified from cross-trait meta-analysis (P-CPASSOC < 5×10-8, single trait P-value < 1×10-3).
SNP	Test.shet	p.shet	CHR.1	BP.1	A1.1	A2.1	BETA.1	SE.1	P.1	N.1	Z.1	CHR.2	BP.2	A1.2	A2.2	BETA.2	SE.2	P.2	N.2	Z.2
CPASSOC			Trait1:ischemic stroke									Trait2:OSA
rs78581380	66.0844	4.9085e-16	6	1365073	G	T	0.0847	0.0114	1.295e-13	1296908	7.42982	6	1365073	G	T	-0.0376976	0.0113721	0.000916727	375657	-3.31492
rs12524544	65.7107	5.98508e-16	6	1366220	C	T	0.0844	0.0114	1.143e-13	1296908	7.40351	6	1366220	C	T	-0.0378077	0.011379	0.000891826	375657	-3.32259
rs76110445	64.4694	1.15665e-15	6	1364866	C	T	0.0827	0.0113	2.939e-13	1296908	7.31858	6	1364866	C	T	-0.0379423	0.0113655	0.000842733	375657	-3.33837
rs7766042	60.0038	1.2378e-14	6	1366718	C	T	0.0844	0.012	1.818e-12	1296908	7.03333	6	1366718	C	T	-0.0393401	0.0118904	0.000937756	375657	-3.30856
rs12525740	59.4351	1.67393e-14	6	1366052	A	G	0.0797	0.0114	3.238e-12	1296908	6.99123	6	1366052	A	G	-0.0377852	0.0113779	0.00089716	375657	-3.32093
rs4959545	59.4027	1.70299e-14	6	1327402	C	T	0.0681	0.0102	2.873e-11	1296908	6.67647	6	1327402	C	T	-0.0484055	0.0111799	1.49317e-05	375657	-4.32969
rs12525352	59.303	1.79559e-14	6	1365883	C	G	0.0796	0.0114	3.336e-12	1296908	6.98246	6	1365883	C	G	-0.0377757	0.0113767	0.000898752	375657	-3.32044
rs12524120	59.2954	1.80288e-14	6	1365650	A	T	0.0796	0.0114	2.873e-12	1296908	6.98246	6	1365650	A	T	-0.0377518	0.0113752	0.000904107	375657	-3.31878
rs78120638	59.1552	1.94213e-14	6	1326826	C	A	0.0679	0.0102	3.391e-11	1296908	6.65686	6	1326826	C	A	-0.0485109	0.0111802	1.4313e-05	375657	-4.339
rs2317897	58.7931	2.35372e-14	6	1329748	G	A	0.0677	0.0102	3.971e-11	1296908	6.63725	6	1329748	G	A	-0.048327	0.0111787	1.5384e-05	375657	-4.32313
rs115370942	58.7898	2.35784e-14	6	1330230	T	A	0.0677	0.0102	3.921e-11	1296908	6.63725	6	1330230	T	A	-0.0483185	0.0111786	1.54348e-05	375657	-4.32241
rs74536576	58.7317	2.43177e-14	6	1316016	G	T	0.0681	0.0103	3.343e-11	1296908	6.61165	6	1316016	G	T	-0.0487959	0.0111094	1.12148e-05	375657	-4.39231
rs1922930	58.3158	3.03259e-14	6	1364691	C	A	0.0778	0.0113	5.231e-12	1296908	6.88496	6	1364691	C	A	-0.0389017	0.0113781	0.000628507	375657	-3.419
rs144800962	57.2177	5.43228e-14	6	1330891	G	A	0.0666	0.0102	7.259e-11	1296908	6.52941	6	1330891	G	A	-0.0483366	0.0111789	1.53271e-05	375657	-4.32391
rs149766397	55.9257	1.07861e-13	6	1333266	A	G	0.0657	0.0102	1.192e-10	1296908	6.44118	6	1333266	A	G	-0.0482925	0.011178	1.55815e-05	375657	-4.32032
rs79842006	55.5139	1.34217e-13	6	1342025	G	T	0.067	0.0103	7.879e-11	1296908	6.50485	6	1342025	G	T	-0.0429334	0.0106741	5.76607e-05	375657	-4.0222
rs79447906	55.3515	1.46303e-13	6	1350471	C	A	0.0647	0.0098	4.881e-11	1296908	6.60204	6	1350471	C	A	-0.0381426	0.0103876	0.000240719	375657	-3.67194
rs77926136	55.3116	1.49437e-13	6	1344017	G	A	0.0649	0.01	7.982e-11	1296908	6.49	6	1344017	G	A	-0.0429593	0.0106744	5.70939e-05	375657	-4.02452
rs17201698	55.3022	1.50189e-13	6	1346561	G	T	0.0648	0.01	9.826e-11	1296908	6.48	6	1346561	G	T	-0.0433321	0.010687	5.02065e-05	375657	-4.05466
rs76020229	55.247	1.54653e-13	6	1348793	C	T	0.065	0.0099	4.748e-11	1296908	6.56566	6	1348793	C	T	-0.0391944	0.0104081	0.000166054	375657	-3.76576
rs6934726	55.1842	1.59895e-13	6	1345162	G	A	0.0648	0.01	8.652e-11	1296908	6.48	6	1345162	G	A	-0.0430043	0.0106763	5.62484e-05	375657	-4.02802
rs74447631	55.0701	1.69882e-13	6	1345510	G	A	0.0647	0.01	8.428e-11	1296908	6.47	6	1345510	G	A	-0.0430855	0.0106793	5.47255e-05	375657	-4.03449
rs78694194	54.8133	1.94698e-13	6	1345835	G	A	0.0645	0.01	1.079e-10	1296908	6.45	6	1345835	G	A	-0.0431638	0.0106818	5.3255e-05	375657	-4.04087
rs2015134	54.7474	2.01628e-13	6	1326894	A	C	0.0648	0.0102	2.586e-10	1296908	6.35294	6	1326894	A	C	-0.0485128	0.0111802	1.43014e-05	375657	-4.33917
rs79783857	54.7412	2.02297e-13	6	1344000	G	T	0.0645	0.01	1.006e-10	1296908	6.45	6	1344000	G	T	-0.0429593	0.0106744	5.70966e-05	375657	-4.02452
rs75289435	54.6479	2.12562e-13	6	1341463	G	A	0.0638	0.0099	1.416e-10	1296908	6.44444	6	1341463	G	A	-0.0429232	0.010674	5.78815e-05	375657	-4.02129
rs74484590	54.5853	2.19751e-13	6	1341423	G	A	0.0644	0.01	1.099e-10	1296908	6.44	6	1341423	G	A	-0.0429244	0.010674	5.78522e-05	375657	-4.0214
rs2217958	54.5445	2.24563e-13	6	1309580	C	A	0.0649	0.0103	2.669e-10	1296908	6.30097	6	1309580	C	A	-0.0498639	0.0111782	8.16488e-06	375657	-4.46082
rs78169666	54.4891	2.31271e-13	6	1349830	C	A	0.0649	0.0099	4.724e-11	1296908	6.55556	6	1349830	C	A	-0.037908	0.0104528	0.00028719	375657	-3.62659
rs75802256	54.4521	2.35855e-13	6	1342508	C	T	0.0643	0.01	1.164e-10	1296908	6.43	6	1342508	C	T	-0.0429565	0.0106767	5.73694e-05	375657	-4.02339
rs80181719	54.4389	2.37507e-13	6	1341094	G	T	0.0643	0.01	1.169e-10	1296908	6.43	6	1341094	G	T	-0.0429129	0.0106738	5.81005e-05	375657	-4.0204
rs79565252	54.1622	2.75101e-13	6	1341581	G	A	0.0641	0.01	1.236e-10	1296908	6.41	6	1341581	G	A	-0.0429301	0.0106741	5.77285e-05	375657	-4.02189
rs77796590	53.8838	3.18921e-13	6	1342334	C	T	0.0639	0.01	1.479e-10	1296908	6.39	6	1342334	C	T	-0.0429408	0.0106742	5.7495e-05	375657	-4.02286
rs79368490	53.6016	3.70472e-13	6	1342314	G	A	0.0637	0.01	1.585e-10	1296908	6.37	6	1342314	G	A	-0.04294	0.0106742	5.75122e-05	375657	-4.02278
rs951318	53.5049	3.8999e-13	6	1318711	G	A	0.0644	0.0103	3.621e-10	1296908	6.25243	6	1318711	G	A	-0.0489492	0.0111755	1.18662e-05	375657	-4.38005
rs10498653	53.3824	4.16205e-13	6	1334409	A	G	0.0645	0.0103	3.326e-10	1296908	6.26214	6	1334409	A	G	-0.0483088	0.0111811	1.55625e-05	375657	-4.32058
rs76845519	53.3048	4.33696e-13	6	1361673	G	C	0.0658	0.0102	9.563e-11	1296908	6.45098	6	1361673	G	C	-0.0384498	0.0104107	0.000221381	375657	-3.6933
rs78451852	53.2447	4.47778e-13	6	1338265	C	T	0.0634	0.01	2.067e-10	1296908	6.34	6	1338265	C	T	-0.0430984	0.0106742	5.39921e-05	375657	-4.03762
rs75586483	52.8748	5.44951e-13	6	1343622	G	A	0.0638	0.0101	2.379e-10	1296908	6.31683	6	1343622	G	A	-0.0429866	0.0106742	5.64586e-05	375657	-4.02715
rs142637665	52.8324	5.57359e-13	6	1360180	G	A	0.0654	0.0102	1.325e-10	1296908	6.41176	6	1360180	G	A	-0.0386391	0.0104121	0.000206448	375657	-3.71098
rs17260640	52.7784	5.73572e-13	6	1334861	C	G	0.0635	0.0102	4.569e-10	1296908	6.22549	6	1334861	C	G	-0.0480772	0.0111816	1.71053e-05	375657	-4.29967
rs74695629	52.2913	7.42861e-13	6	1359869	C	T	0.065	0.0102	1.79e-10	1296908	6.37255	6	1359869	C	T	-0.038652	0.010412	0.000205419	375657	-3.71226
rs6918607	51.7739	9.77739e-13	6	1354066	C	T	0.0646	0.0102	2.013e-10	1296908	6.33333	6	1354066	C	T	-0.0386926	0.0104057	0.000200484	375657	-3.7184
rs6914568	51.7188	1.00678e-12	6	1354381	G	A	0.0646	0.0102	1.99e-10	1296908	6.33333	6	1354381	G	A	-0.0385695	0.0104086	0.000210945	375657	-3.70554
rs75410682	50.4778	1.94589e-12	6	1350121	A	G	0.0613	0.0098	4.779e-10	1296908	6.2551	6	1350121	A	G	-0.038157	0.0104067	0.000245805	375657	-3.66658
rs17261109	50.2755	2.16662e-12	6	1346541	T	C	0.0612	0.01	1.121e-09	1296908	6.12	6	1346541	T	C	-0.0433322	0.0106868	5.01915e-05	375657	-4.05474
rs17261060	50.1372	2.33169e-12	6	1346515	A	G	0.0611	0.01	1.195e-09	1296908	6.11	6	1346515	A	G	-0.043327	0.0106868	5.02898e-05	375657	-4.05425
rs6936630	50.0438	2.45026e-12	6	1332705	A	T	0.0662	0.011	1.721e-09	1296908	6.01818	6	1332705	A	T	-0.0484195	0.0111864	1.50179e-05	375657	-4.32843
rs6596811	50.0312	2.46663e-12	6	1346989	T	C	0.061	0.01	1.052e-09	1296908	6.1	6	1346989	T	C	-0.0434147	0.0106896	4.87809e-05	375657	-4.0614
rs6596812	49.9063	2.63582e-12	6	1347118	A	G	0.0609	0.01	1.108e-09	1296908	6.09	6	1347118	A	G	-0.0434454	0.0106903	4.82414e-05	375657	-4.064
rs78460052	49.6172	3.07323e-12	6	1345762	A	G	0.0608	0.01	1.052e-09	1296908	6.08	6	1345762	A	G	-0.0430303	0.0106842	5.63832e-05	375657	-4.02747
rs75964227	49.4868	3.29356e-12	6	1345750	A	G	0.0607	0.01	1.185e-09	1296908	6.07	6	1345750	A	G	-0.0430421	0.010684	5.60983e-05	375657	-4.02865
rs79618067	49.3363	3.56749e-12	6	1344549	T	G	0.0606	0.01	1.319e-09	1296908	6.06	6	1344549	T	G	-0.0429648	0.0106745	5.69757e-05	375657	-4.02499
rs17260983	49.3329	3.57404e-12	6	1341652	T	C	0.06	0.0099	1.659e-09	1296908	6.06061	6	1341652	T	C	-0.0429335	0.0106741	5.76554e-05	375657	-4.02221
rs4959130	49.2799	3.6761e-12	6	1356916	A	G	0.0626	0.0102	7.036e-10	1296908	6.13725	6	1356916	A	G	-0.0392206	0.010425	0.000168438	375657	-3.76217
rs78252540	49.0773	4.09367e-12	6	1342663	T	C	0.0604	0.01	1.475e-09	1296908	6.04	6	1342663	T	C	-0.0429932	0.0106748	5.63677e-05	375657	-4.02754
rs77510766	49.0728	4.10336e-12	6	1345681	A	G	0.0603	0.01	1.883e-09	1296908	6.03	6	1345681	A	G	-0.0433527	0.0106813	4.93378e-05	375657	-4.05875
rs114957082	48.984	4.30162e-12	6	1338570	A	G	0.0603	0.01	1.465e-09	1296908	6.03	6	1338570	A	G	-0.0430965	0.0106742	5.40344e-05	375657	-4.03745
rs4959546	48.9242	4.44038e-12	6	1343031	A	G	0.0603	0.01	1.428e-09	1296908	6.03	6	1343031	A	G	-0.0429438	0.0106743	5.74341e-05	375657	-4.0231
rs6939790	48.6899	5.02876e-12	6	1345303	G	T	0.0601	0.01	1.796e-09	1296908	6.01	6	1345303	G	T	-0.0430459	0.0106778	5.54536e-05	375657	-4.03135
rs75472582	48.6559	5.12045e-12	6	1342620	A	G	0.0601	0.01	2.047e-09	1296908	6.01	6	1342620	A	G	-0.042944	0.0106742	5.74275e-05	375657	-4.02316
rs17261011	48.6528	5.12871e-12	6	1341730	A	G	0.0601	0.01	1.655e-09	1296908	6.01	6	1341730	A	G	-0.0429358	0.0106741	5.76023e-05	375657	-4.02243
rs79616889	48.3899	5.89728e-12	6	1341065	A	C	0.0601	0.01	1.576e-09	1296908	6.01	6	1341065	A	C	-0.0422309	0.0106669	7.52471e-05	375657	-3.95906
rs74622239	47.9839	7.31604e-12	6	1342082	A	G	0.0596	0.01	2.185e-09	1296908	5.96	6	1342082	A	G	-0.042934	0.0106741	5.76461e-05	375657	-4.02226
rs77606213	47.9465	7.46316e-12	6	1339580	A	G	0.0592	0.0099	2.553e-09	1296908	5.9798	6	1339580	A	G	-0.0421234	0.0106661	7.83899e-05	375657	-3.94928
rs77190919	47.8506	7.85313e-12	6	1363227	A	T	0.0617	0.0102	1.5e-09	1296908	6.04902	6	1363227	A	T	-0.0385857	0.0104212	0.000213383	375657	-3.70262
rs75805880	47.7782	8.16073e-12	6	1356394	A	G	0.0616	0.0102	1.439e-09	1296908	6.03922	6	1356394	A	G	-0.0386878	0.0104092	0.000201855	375657	-3.71669
rs115480909	47.2651	1.07168e-11	6	1353880	T	C	0.0612	0.0102	1.853e-09	1296908	6	6	1353880	T	C	-0.0386898	0.0104052	0.000200553	375657	-3.71831
rs114414037	47.1301	1.1514e-11	6	1360139	A	G	0.0611	0.0102	2.038e-09	1296908	5.9902	6	1360139	A	G	-0.038709	0.0104142	0.000201646	375657	-3.71694
rs77014272	47.1089	1.1644e-11	6	1359937	A	G	0.0611	0.0102	1.97e-09	1296908	5.9902	6	1359937	A	G	-0.038647	0.010412	0.000205802	375657	-3.71177
rs149733755	47.01	1.22722e-11	6	1355160	A	C	0.0609	0.0102	2.263e-09	1296908	5.97059	6	1355160	A	C	-0.0390354	0.0104071	0.000176238	375657	-3.75084
rs74564934	47	1.23377e-11	6	1335849	T	C	0.0564	0.0097	6.032e-09	1296908	5.81443	6	1335849	T	C	-0.0429679	0.0101045	2.11534e-05	375657	-4.25235
rs6912034	46.596	1.529e-11	6	1350834	T	C	0.0601	0.0101	3.051e-09	1296908	5.9505	6	1350834	T	C	-0.0386312	0.0104012	0.00020392	375657	-3.71411
rs4451181	45.9725	2.12924e-11	6	1362793	A	G	0.0608	0.0103	3.19e-09	1296908	5.90291	6	1362793	A	G	-0.0386962	0.0104195	0.000204141	375657	-3.71383
rs12198803	45.8833	2.23252e-11	6	1340473	G	A	0.0489	0.0085	8.828e-09	1296908	5.75294	6	1340473	G	A	-0.0383441	0.00918259	2.97023e-05	375657	-4.17574
rs1922929	45.3599	2.94807e-11	6	1364471	C	A	0.068	0.0114	2.336e-09	1296908	5.96491	6	1364471	C	A	-0.0386598	0.0115006	0.000775068	375657	-3.36155
rs12197982	45.3455	2.97062e-11	6	1338196	G	C	0.0484	0.0085	1.191e-08	1296908	5.69412	6	1338196	G	C	-0.0388607	0.00918278	2.31718e-05	375657	-4.23191
rs75143273	44.9375	3.68948e-11	6	1359169	A	G	0.0594	0.0102	5.227e-09	1296908	5.82353	6	1359169	A	G	-0.0386515	0.0104117	0.000205367	375657	-3.71231
rs12212982	44.4337	4.82168e-11	6	1339188	A	G	0.0478	0.0085	2.085e-08	1296908	5.62353	6	1339188	A	G	-0.0388546	0.00918279	2.32402e-05	375657	-4.23124
rs12211303	44.0374	5.95134e-11	6	1338655	C	G	0.0476	0.0085	2.172e-08	1296908	5.6	6	1338655	C	G	-0.0386286	0.00918164	2.58595e-05	375657	-4.20716
rs74354085	42.7032	1.20896e-10	6	1357464	T	C	0.0572	0.0101	1.633e-08	1296908	5.66337	6	1357464	T	C	-0.0374609	0.0102281	0.000249712	375657	-3.66255
rs1549758	42.6647	1.23395e-10	7	150695726	T	C	0.0476	0.0083	8.969e-09	1296908	5.73494	7	150695726	T	C	0.0350165	0.00883451	7.38278e-05	375657	3.9636
rs12200309	40.688	3.52663e-10	6	1340548	G	T	0.0454	0.0085	9.632e-08	1296908	5.34118	6	1340548	G	T	-0.03837	0.0091829	2.93542e-05	375657	-4.17842
rs2006798	36.5968	3.10079e-09	6	1316451	G	A	0.0433	0.0084	2.508e-07	1296908	5.15476	6	1316451	G	A	-0.0317863	0.00864974	0.000238007	375657	-3.67483
rs891512	33.716	1.43367e-08	7	150708089	A	G	0.045	0.0094	1.61e-06	1296908	4.78723	7	150708089	A	G	0.0497497	0.0106337	2.88975e-06	375657	4.67849
rs2256314	33.5354	1.57811e-08	7	150708850	G	A	0.0417	0.0089	2.784e-06	1296908	4.68539	7	150708850	G	A	0.051786	0.0103643	5.83593e-07	375657	4.99657
rs1808593	32.9775	2.12301e-08	7	150708302	G	T	0.0411	0.0089	3.968e-06	1296908	4.61798	7	150708302	G	T	0.052397	0.0103554	4.19575e-07	375657	5.05987
rs743507	32.518	2.71049e-08	7	150707488	C	T	0.0412	0.009	4.608e-06	1296908	4.57778	7	150707488	C	T	0.0523992	0.0103681	4.32952e-07	375657	5.05389
rs743506	31.631	4.34358e-08	7	150706915	G	A	0.0401	0.0089	7.026e-06	1296908	4.50562	7	150706915	G	A	0.0520632	0.0103732	5.19398e-07	375657	5.01901
rs7746700	31.3682	4.99477e-08	6	1323447	G	A	0.033	0.0074	7.061e-06	1296908	4.45946	6	1323447	G	A	-0.0352792	0.00799621	1.02426e-05	375657	-4.41199

## Sheet: Supplementary Table 02
Table S2:The result of FUMA annotation
ENSG	Symbol	CHR	Start	End	posMapSNPs	posMapMaxCADD	minGwasP	IndSigSNPs	GenomicLocus
ENSG00000130940	CASZ1	1	10696661	10856707	10	16.85	3.22E-10	rs880315	1
ENSG00000196189	SEMA4A	1	156117157	156147543	7	4.625	5.99E-11	rs2736613	3
ENSG00000160785	SLC25A44	1	156163880	156182587	60	14.89	5.11E-11	rs2736613	3
ENSG00000260238	PMF1-BGLAP	1	156182773	156213123	67	16.07	4.64E-11	rs2736613	3
ENSG00000160783	PMF1	1	156182784	156212874	67	16.07	4.64E-11	rs2736613	3
ENSG00000242252	BGLAP	1	156211753	156213112	14	14.48	1.54E-10	rs2736613	3
ENSG00000160781	PAQR6	1	156213206	156217881	7	14.48	2.25E-10	rs2736613	3
ENSG00000115604	IL18R1	2	102927989	103015218	1	6.919	2.40E-05	rs76229479	4
ENSG00000115607	IL18RAP	2	103035149	103069025	9	6.176	8.76E-06	rs76229479	4
ENSG00000180251	SLC9A4	2	103089762	103150431	39	11.96	5.75E-09	rs76229479	4
ENSG00000115616	SLC9A2	2	103236166	103327777	1	5.969	4.13E-06	rs76229479	4
ENSG00000138439	FAM117B	2	203499901	203634480	4	4.065	6.06E-10	rs2351524	5
ENSG00000163596	ICA1L	2	203640690	203736708	117	15.97	3.88E-10	rs2351524	5
ENSG00000138442	WDR12	2	203739505	203879521	174	20.2	3.54E-10	rs2351524	5
ENSG00000138380	CARF	2	203776937	203851786	107	17.48	4.39E-10	rs2351524	5
ENSG00000144426	NBEAL1	2	203879602	204091101	57	12.95	3.54E-10	rs2351524	5
ENSG00000119004	CYP20A1	2	204103663	204163009	6	5.605	5.66E-09	rs2351524	5
ENSG00000138443	ABI2	2	204192942	204312446	1	0.036	NA	rs2351524	5
ENSG00000144868	TMEM108	3	132757235	133116636	1	4.961	0.000189195	rs114106239	6
ENSG00000163288	GABRB1	4	46995740	47428461	85	14.93	4.70E-08	rs13114985	7
ENSG00000171566	PLRG1	4	155456158	155471587	28	6.996	2.90E-13	rs7689945;rs1025154	9
ENSG00000171564	FGB	4	155484108	155492238	9	5.436	1.62E-16	rs1025154;rs12512879;rs56010410	9
ENSG00000171560	FGA	4	155504278	155511918	14	7.019	7.37E-17	rs12512879;rs56010410	9
ENSG00000171557	FGG	4	155525286	155534119	18	12.82	5.67E-16	rs56010410;rs1118824;rs6536024	9
ENSG00000121207	LRAT	4	155548097	155674270	5	9.322	5.67E-16	rs56010410;rs1118824;rs6536024	9
ENSG00000164344	KLKB1	4	187130133	187179625	7	3.299	6.46E-09	rs3756011;rs6843711;rs4253416	10
ENSG00000088926	F11	4	187187099	187210835	25	5.407	4.22E-11	rs3756011;rs6843711;rs4253416	10
ENSG00000164185	ZNF474	5	121465208	121515312	27	16.75	5.51E-10	rs62382996;rs17148926	11
ENSG00000164379	FOXQ1	6	1312675	1314992	19	9.984	2.43E-14	rs72831930;rs4959545;rs7746700;rs12198803	12
ENSG00000137273	FOXF2	6	1390069	1395832	1	4.751	1.58E-10	rs79318212	12
ENSG00000124762	CDKN1A	6	36644305	36655116	15	16.03	4.20E-08	rs3176336	13
ENSG00000158321	AUTS2	7	69063905	70258054	352	20.9	9.67E-10	rs10452738;rs11981973	14
ENSG00000105810	CDK6	7	92234235	92465908	50	16.21	2.95E-11	rs42036;rs2282983	15
ENSG00000164867	NOS3	7	150688083	150711676	11	10.96	1.23E-10	rs1549758;rs891512	16
ENSG00000181652	ATG9B	7	150709297	150721586	8	9.639	1.43E-08	rs891512	16
ENSG00000264545	RP11-145E5.5	9	21802635	22032985	5	6.367	2.06E-05	rs10757270	17
ENSG00000147889	CDKN2A	9	21967751	21995300	3	6.367	4.07E-05	rs10757270	17
ENSG00000147883	CDKN2B	9	22002902	22009362	4	6.367	2.06E-05	rs10757270	17
ENSG00000044574	HSPA5	9	127997132	128003609	4	4.631	1.13E-07	rs10986730	18
ENSG00000165219	GAPVD1	9	128024073	128129486	130	17.62	2.46E-09	rs10986730	18
ENSG00000165995	CACNB2	10	18429606	18830798	2	5.937	6.83E-10	rs184067968;rs113955098	20
ENSG00000198873	GRK5	10	120967101	121215131	1	4.515	1.92E-13	rs10886430	21
ENSG00000254636	ARMS2	10	124214169	124216868	1	0.589	6.58E-11	rs72631113	22
ENSG00000166033	HTRA1	10	124221041	124274424	2	0.97	6.58E-11	rs72631113	22
ENSG00000149968	MMP3	11	102706532	102714534	7	8.555	1.33E-06	rs150986675	24
ENSG00000076108	BAZ2A	12	56989380	57030600	2	10.61	3.04E-08	rs59333125	25
ENSG00000110955	ATP5B	12	57031959	57039798	2	10.61	3.04E-08	rs59333125	25
ENSG00000110958	PTGES3	12	57057127	57082159	4	5.411	1.54E-07	rs59333125	25
ENSG00000196531	NACA	12	57106212	57125412	1	3.079	2.72E-07	rs59333125	25
ENSG00000198056	PRIM1	12	57125380	57146157	1	3.079	2.72E-07	rs59333125	25
ENSG00000111249	CUX2	12	111471828	111788358	6	16.4	5.48E-10	rs4378452;rs1265565	27
ENSG00000111252	SH2B3	12	111843752	111889427	35	21.4	3.06E-19	rs597808;rs678436	27
ENSG00000204842	ATXN2	12	111890018	112037480	106	18.59	6.07E-20	rs678436;rs597808;rs2238151	27
ENSG00000089234	BRAP	12	112079950	112123790	21	11.71	1.15E-18	rs597808;rs4766897;rs678436;rs2238151;rs7974266	27
ENSG00000111271	ACAD10	12	112123857	112194903	41	11.71	4.70E-17	rs2238151;rs678436;rs7974266;rs597808;rs4766897	27
ENSG00000257767	RP11-162P23.2	12	112191694	112229222	9	6.186	4.70E-17	rs678436;rs2238151;rs7974266;rs597808;rs4766897	27
ENSG00000111275	ALDH2	12	112204691	112247782	7	4.336	4.70E-17	rs2238151;rs678436;rs7974266;rs597808;rs4766897	27
ENSG00000089022	MAPKAPK5	12	112279782	112334343	5	6.057	6.01E-14	rs597808;rs4766897;rs2238151;rs678436;rs7974266	27
ENSG00000198270	TMEM116	12	112369086	112450970	3	8.262	2.20E-07	rs2238151;rs678436;rs7974266	27
ENSG00000089248	ERP29	12	112451120	112461255	2	3.103	1.44E-12	rs2238151;rs678436;rs7974266	27
ENSG00000111300	NAA25	12	112464500	112546826	13	10.51	4.80E-17	rs2238151;rs678436;rs7974266;rs597808	27
ENSG00000135148	TRAFD1	12	112563305	112591407	2	14.81	9.65E-15	rs597808;rs4766897;rs2238151;rs678436;rs7974266	27
ENSG00000173064	HECTD4	12	112597992	112819896	19	21	1.18E-15	rs597808;rs4766897;rs2238151;rs678436;rs7974266	27
ENSG00000089009	RPL6	12	112842994	112856642	8	6.023	1.67E-09	rs2238151;rs678436;rs7974266;rs597808	27
ENSG00000179295	PTPN11	12	112856155	112947717	12	9.917	3.69E-15	rs2238151;rs678436;rs7974266;rs597808;rs4766897	27
ENSG00000089169	RPH3A	12	113008184	113336686	7	11.36	7.36E-09	rs7974266	27
ENSG00000021645	NRXN3	14	78708734	80330762	22	18.29	1.80E-08	rs2370982	28
ENSG00000140564	FURIN	15	91411822	91426688	21	15.24	1.21E-08	rs1573644	29
ENSG00000182511	FES	15	91426925	91439006	15	12.04	1.21E-08	rs1573644	29
ENSG00000196547	MAN2A2	15	91445448	91465814	2	8.775	4.66E-07	rs1573644	29
ENSG00000140718	FTO	16	53737875	54155853	131	21.4	7.63E-24	rs7206790;rs9922708;rs3751813;rs9932600;rs7187961;rs113191842	31
ENSG00000108557	RAI1	17	17584787	17714767	26	16.13	1.36E-08	rs11655029	33
ENSG00000072310	SREBF1	17	17713713	17740325	7	5.113	2.48E-05	rs11655029	33
ENSG00000005381	MPO	17	56347217	56358296	19	10.53	9.30E-08	rs2526381	34
ENSG00000005379	BZRAP1	17	56378592	56406152	27	15.72	9.70E-09	rs2526381	34
ENSG00000213246	SUPT4H1	17	56422539	56430454	3	23	2.56E-08	rs2526381	34
ENSG00000108375	RNF43	17	56429861	56494956	33	23	2.56E-08	rs2526381	34
ENSG00000176160	HSF5	17	56497528	56565745	41	14.85	3.74E-08	rs2526381	34
ENSG00000108389	MTMR4	17	56566898	56595266	17	11.34	3.74E-08	rs2526381	34
ENSG00000108387	SEPT4	17	56597611	56618179	1	2.258	7.14E-08	rs2526381	34
ENSG00000129353	SLC44A2	19	10713133	10755235	39	15.92	4.36E-08	rs7250421	35
ENSG00000226104	AC011475.1	19	10751715	10752093	9	15.92	1.50E-07	rs7250421	35
ENSG00000130164	LDLR	19	11200038	11244492	45	13.85	6.67E-09	rs148898583	35
ENSG00000010310	GIPR	19	46171502	46186982	8	25.5	1.71E-08	rs10423928	36
ENSG00000125743	SNRPD2	19	46190712	46195827	7	25.5	1.71E-08	rs10423928	36
ENSG00000011478	QPCTL	19	46195741	46207247	3	2.74	2.52E-05	rs10423928	36
ENSG00000131069	ACSS2	20	33459949	33515769	2	5.072	6.22E-07	rs11907011	37
ENSG00000100983	GSS	20	33516236	33543620	12	5.871	1.97E-10	rs11907011	37
ENSG00000078814	MYH7B	20	33563206	33590240	32	17.02	1.44E-10	rs11907011	37
ENSG00000100991	TRPC4AP	20	33590207	33680674	83	17.02	1.44E-10	rs11907011	37
ENSG00000088298	EDEM2	20	33703167	33865928	98	16.65	8.78E-11	rs11907011	37
ENSG00000101000	PROCR	20	33759876	33765165	16	16.65	8.78E-11	rs11907011	37
ENSG00000125966	MMP24	20	33814457	33864801	1	5.529	5.21E-06	rs11907011	37
ENSG00000101162	TUBB1	20	57594309	57601709	1	12.49	NA	rs144468328	39
ENSG00000124172	ATP5E	20	57600522	57607437	1	12.49	NA	rs144468328	39
ENSG00000101166	SLMO2	20	57608200	57617964	1	12.49	NA	rs144468328	39
ENSG00000124203	ZNF831	20	57766075	57834168	2	3.286	5.78E-09	rs144468328	39

## Sheet: Supplementary Table 03
Table S3.The result of MAGMA
Gene	CHR	Start	Stop	NSNPS	NPARAM	N	SYMBOL
ENSG00000269831	1	688532	789137	36	2	1672565	AL669831.1
ENSG00000269308	1	768043	869983	156	20	1672565	AL645608.2
ENSG00000187634	1	810260	929955	247	34	1672565	SAMD11
ENSG00000268179	1	811264	916445	200	27	1672565	AL645608.1
ENSG00000188976	1	829584	944689	282	31	1672565	NOC2L
ENSG00000187961	1	845967	951095	258	28	1672565	KLHL17
ENSG00000187583	1	851877	961245	257	29	1672565	PLEKHN1
ENSG00000187642	1	860579	967497	239	30	1672565	C1orf170
ENSG00000188290	1	884342	985552	235	26	1672565	HES4
ENSG00000187608	1	898803	999920	227	23	1672565	ISG15
ENSG00000188157	1	905503	1041496	308	25	1672565	AGRN
ENSG00000237330	1	956346	1059687	234	25	1672565	RNF223
ENSG00000131591	1	967198	1101741	355	30	1672565	C1orf159
ENSG00000162571	1	1059264	1183315	465	44	1672565	TTLL10
ENSG00000186891	1	1088888	1192071	394	33	1672565	TNFRSF18
ENSG00000186827	1	1096706	1199518	370	27	1672565	TNFRSF4
ENSG00000078808	1	1102288	1217411	403	26	1672565	SDF4
ENSG00000176022	1	1117629	1220421	354	21	1672565	B3GALT6
ENSG00000184163	1	1127826	1232102	323	21	1672565	FAM132A
ENSG00000160087	1	1139289	1259265	317	22	1672565	UBE2J2
ENSG00000162572	1	1165816	1277409	241	26	1672565	SCNN1D
ENSG00000131584	1	1177756	1294989	229	24	1672565	ACAP3
ENSG00000169972	1	1193947	1297057	201	20	1672565	PUSL1
ENSG00000127054	1	1196965	1310071	252	19	1672565	CPSF3L
ENSG00000224051	1	1210136	1314277	248	22	1672565	GLTPD1
ENSG00000169962	1	1216694	1320686	236	20	1672565	TAS1R3
ENSG00000107404	1	1220656	1334730	237	19	1672565	DVL1
ENSG00000162576	1	1238069	1347157	237	18	1672565	MXRA8
ENSG00000175756	1	1259110	1360875	247	17	1672565	AURKAIP1
ENSG00000221978	1	1271091	1384708	261	15	1672565	CCNL2
ENSG00000224870	1	1284902	1387426	243	19	1672565	RP4-758J18.2
ENSG00000242485	1	1287288	1392693	255	15	1672565	MRPL20
ENSG00000235098	1	1303800	1407149	211	19	1672565	ANKRD65
ENSG00000205116	1	1311508	1413167	176	17	1672565	TMEM88B
ENSG00000179403	1	1320241	1428262	161	18	1672565	VWA1
ENSG00000215915	1	1335069	1455538	163	19	1672565	ATAD3C
ENSG00000160072	1	1357143	1483228	159	22	1672565	ATAD3B
ENSG00000197785	1	1397531	1520067	144	17	1672565	ATAD3A
ENSG00000205090	1	1420554	1525833	155	20	1672565	TMEM240
ENSG00000160075	1	1427053	1560249	215	30	1672565	SSU72
ENSG00000215014	1	1460355	1561373	193	27	1672565	AL645728.1
ENSG00000228594	1	1483392	1585476	170	26	1672565	C1orf233
ENSG00000197530	1	1500795	1615990	171	26	1672565	MIB2
ENSG00000189409	1	1517474	1620639	152	21	1672565	MMP23B
ENSG00000248333	1	1520603	1640473	159	22	1672565	CDK11B
ENSG00000189339	1	1542939	1674167	150	23	1672565	SLC35E2B
ENSG00000008128	1	1584169	1705766	149	19	1672565	CDK11A
ENSG00000215790	1	1606277	1727431	156	18	1672565	SLC35E2
ENSG00000008130	1	1632671	1761896	159	16	1672565	NADK
ENSG00000078369	1	1666729	1872495	289	16	1672565	GNB1
ENSG00000169885	1	1796266	1898735	219	19	1672565	CALML6
ENSG00000178821	1	1799029	1900712	228	20	1672565	TMEM52
ENSG00000142609	1	1803396	1985276	435	39	1672565	C1orf222
ENSG00000187730	1	1900780	2012192	290	35	1672565	GABRD
ENSG00000067606	1	1931909	2166834	519	36	1672565	PRKCZ
ENSG00000162585	1	2065903	2194159	252	20	1672565	C1orf86
ENSG00000269554	1	2071237	2173179	196	21	1672565	AL590822.2
ENSG00000203301	1	2093360	2195620	185	26	1672565	AL590822.1
ENSG00000157933	1	2110134	2291558	490	69	1672565	SKI
ENSG00000116151	1	2202692	2373146	559	79	1672565	MORN1
ENSG00000269753	1	2208581	2309042	353	47	1672565	AL589739.1
ENSG00000157916	1	2273267	2386883	375	62	1672565	RER1
ENSG00000157911	1	2286236	2395236	347	60	1672565	PEX10
ENSG00000149527	1	2307419	2486969	480	72	1672565	PLCH2
ENSG00000157881	1	2389972	2508039	263	30	1672565	PANK4
ENSG00000197921	1	2410184	2511684	209	26	1672565	HES5
ENSG00000157873	1	2437078	2546821	266	20	1672565	TNFRSF14
ENSG00000157870	1	2467930	2572908	250	17	1672565	FAM213B
ENSG00000142606	1	2472078	2614481	256	13	1672565	MMEL1
ENSG00000215912	1	2517415	2768286	386	21	1672565	TTC34
ENSG00000169717	1	2888046	2989465	276	9	1672565	ACTRT2
ENSG00000142611	1	2935732	3405185	1472	160	1672565	PRDM16
ENSG00000130762	1	3320990	3447677	425	41	1672565	ARHGEF16
ENSG00000162591	1	3356484	3578059	720	88	1672565	MEGF6
ENSG00000158109	1	3491566	3596691	341	47	1672565	TPRG1L
ENSG00000116213	1	3497331	3619325	391	56	1672565	WRAP73
ENSG00000078900	1	3519084	3702765	587	74	1672565	TP73
ENSG00000162592	1	3618962	3738209	439	48	1672565	CCDC27
ENSG00000235169	1	3639352	3742546	399	36	1672565	SMIM1
ENSG00000130764	1	3646784	3763068	495	39	1672565	LRRC47
ENSG00000116198	1	3678645	3823778	713	39	1672565	CEP104
ENSG00000169598	1	3723845	3851993	569	35	1672565	DFFB
ENSG00000198912	1	3755689	3866857	418	39	1672565	C1orf174
ENSG00000196581	1	4664792	4902594	946	106	1672565	AJAP1
ENSG00000131697	1	5872871	6102533	678	43	1672565	NPHP4
ENSG00000069424	1	6001526	6211253	581	59	1672565	KCNAB2
ENSG00000268332	1	6050630	6151399	256	37	1672565	AL035406.1
ENSG00000116254	1	6111853	6290183	467	57	1672565	CHD5
ENSG00000116251	1	6191329	6319449	321	39	1672565	RPL22
ENSG00000158286	1	6215535	6331359	247	35	1672565	RNF207
ENSG00000116237	1	6231253	6346032	235	38	1672565	ICMT
ENSG00000173673	1	6254252	6355638	216	35	1672565	HES3
ENSG00000158292	1	6257406	6371035	245	38	1672565	GPR153
ENSG00000097021	1	6274329	6504451	606	32	1672565	ACOT7
ENSG00000069812	1	6422478	6534730	276	15	1672565	HES2
ENSG00000187017	1	6434848	6571430	316	24	1672565	ESPN
ENSG00000215788	1	6471211	6576255	250	30	1672565	TNFRSF25
ENSG00000171680	1	6476152	6630121	364	26	1672565	PLEKHG5
ENSG00000162408	1	6531407	6664595	273	16	1672565	NOL9
ENSG00000173662	1	6565241	6689817	248	17	1672565	TAS1R1
ENSG00000204859	1	6590061	6699340	215	19	1672565	ZBTB48
ENSG00000162413	1	6600784	6724667	250	26	1672565	KLHL21
ENSG00000116273	1	6623745	6734093	196	22	1672565	PHF13
ENSG00000041988	1	6634926	6745646	192	20	1672565	THAP3
ENSG00000007923	1	6644228	6811984	316	20	1672565	DNAJC11
ENSG00000171735	1	6795384	7879766	2693	190	1672565	CAMTA1
ENSG00000049245	1	7781329	7891492	297	28	1672565	VAMP3
ENSG00000049246	1	7794380	7955237	520	32	1672565	PER3
ENSG00000049247	1	7853143	7963572	420	34	1672565	UTS2
ENSG00000049249	1	7929907	8050926	282	26	1672565	TNFRSF9
ENSG00000116288	1	7964351	8095565	208	20	1672565	PARK7
ENSG00000116285	1	8014464	8136368	163	11	1672565	ERRFI1
ENSG00000162426	1	8327886	8454227	272	29	1672565	SLC45A1
ENSG00000142599	1	8362457	8927702	814	27	1672565	RERE
ENSG00000074800	1	8871061	8989308	225	29	1672565	ENO1
ENSG00000131686	1	8955926	9085151	399	72	1672565	CA6
ENSG00000197241	1	9013359	9136404	362	60	1672565	SLC2A7
ENSG00000142583	1	9045166	9198537	414	46	1672565	SLC2A5
ENSG00000180758	1	9110364	9239229	298	28	1672565	GPR157
ENSG00000049239	1	9244834	9381396	467	57	1672565	H6PD
ENSG00000171621	1	9302939	9479591	600	82	1672565	SPSB1
ENSG00000171612	1	9549541	9695237	186	22	1672565	SLC25A33
ENSG00000188807	1	9598932	9724935	179	22	1672565	TMEM201
ENSG00000171608	1	9661790	9839172	252	35	1672565	PIK3CD
ENSG00000179840	1	9662668	9764644	174	28	1672565	C1orf200
ENSG00000171603	1	9739084	9934584	252	24	1672565	CLSTN1
ENSG00000178585	1	9858334	10020394	215	33	1672565	CTNNBIP1
ENSG00000162441	1	9932173	10053465	157	21	1672565	LZIC
ENSG00000173614	1	9953486	10095559	198	20	1672565	NMNAT1
ENSG00000162444	1	10007264	10126078	173	15	1672565	RBP7
ENSG00000130939	1	10042890	10291297	477	24	1672565	UBE4B
ENSG00000054523	1	10220863	10491661	731	21	1672565	KIF1B
ENSG00000142657	1	10408649	10530201	258	19	1672565	PGD
ENSG00000175279	1	10440159	10562210	236	23	1672565	APITD1
ENSG00000251503	1	10440159	10562210	236	23	1672565	APITD1-CORT
ENSG00000241563	1	10459776	10561959	186	18	1672565	CORT
ENSG00000160049	1	10466579	10582583	219	19	1672565	DFFA
ENSG00000142655	1	10482345	10740815	570	40	1672565	PEX14
ENSG00000130940	1	10646661	10906707	625	97	1672565	CASZ1
ENSG00000175262	1	10956528	11092094	364	50	1672565	C1orf127
ENSG00000120948	1	11022414	11135796	247	23	1672565	TARDBP
ENSG00000009724	1	11036580	11157290	249	19	1672565	MASP2
ENSG00000116649	1	11064641	11170081	227	12	1672565	SRM
ENSG00000171824	1	11076675	11209938	267	9	1672565	EXOSC10
ENSG00000198793	1	11116592	11372564	486	14	1672565	MTOR
ENSG00000171819	1	11199398	11306038	200	9	1672565	ANGPTL7
ENSG00000120942	1	11283263	11406106	255	19	1672565	UBIAD1
ENSG00000204624	1	11489223	11647641	423	28	1672565	PTCHD2
ENSG00000116661	1	11658424	11765842	291	41	1672565	FBXO2
ENSG00000132879	1	11664432	11773384	297	43	1672565	FBXO44
ENSG00000116663	1	11674181	11784411	295	47	1672565	FBXO6
ENSG00000116670	1	11684537	11801707	305	55	1672565	MAD2L2
ENSG00000162490	1	11701786	11835914	364	66	1672565	DRAXIN
ENSG00000177674	1	11746141	11864859	378	50	1672565	AGTRAP
ENSG00000215910	1	11771844	11899642	474	32	1672565	C1orf167
ENSG00000177000	1	11795780	11916977	476	25	1672565	MTHFR
ENSG00000011021	1	11816207	11953201	564	29	1672565	CLCN6
ENSG00000175206	1	11855766	11958402	426	31	1672565	NPPA
ENSG00000120937	1	11867521	11968988	417	31	1672565	NPPB
ENSG00000116685	1	11929648	12036485	339	23	1672565	KIAA2013
ENSG00000083444	1	11944262	12085595	386	25	1672565	PLOD1
ENSG00000116688	1	11990238	12123571	278	25	1672565	MFN2
ENSG00000116691	1	12029523	12142102	215	29	1672565	MIIP
ENSG00000120949	1	12073434	12254264	415	66	1672565	TNFRSF8
ENSG00000028137	1	12177060	12319285	331	48	1672565	TNFRSF1B
ENSG00000048707	1	12240124	12622099	579	54	1672565	VPS13D
ENSG00000162496	1	12577939	12727737	512	51	1672565	DHRS3
ENSG00000204518	1	12654566	12777097	318	31	1672565	AADACL4
ENSG00000188984	1	12726118	12838726	287	22	1672565	AADACL3
ENSG00000157330	1	12756163	12873847	352	26	1672565	C1orf158
ENSG00000116726	1	12784984	12888049	305	23	1672565	PRAMEF12
ENSG00000116721	1	12801546	12906777	274	26	1672565	PRAMEF1
ENSG00000204513	1	12834468	12941264	221	24	1672565	PRAMEF11
ENSG00000179172	1	12857261	12958578	195	21	1672565	HNRNPCL1
ENSG00000120952	1	12866941	12971764	153	17	1672565	PRAMEF2
ENSG00000243073	1	12889045	12996025	65	6	1672565	PRAMEF4
ENSG00000187545	1	12902727	13008101	48	4	1672565	PRAMEF10
ENSG00000229571	1	13166356	13269581	34	4	1672565	PRAMEF26
ENSG00000204478	1	13686907	13797803	87	12	1672565	PRAMEF20
ENSG00000162494	1	13751445	13890543	439	58	1672565	LRRC38
ENSG00000162493	1	13859960	13994452	451	51	1672565	PDPN
ENSG00000116731	1	13976693	14201574	646	33	1672565	PRDM2
ENSG00000189337	1	14875200	15494539	1998	194	1672565	KAZN
ENSG00000171729	1	15429028	15596976	824	49	1672565	TMEM51
ENSG00000204464	1	15440840	15547813	499	35	1672565	C1orf195
ENSG00000142621	1	15523768	15776779	815	85	1672565	FHAD1
ENSG00000142634	1	15686391	15806839	312	42	1672565	EFHD2
ENSG00000162438	1	15714935	15825737	280	41	1672565	CTRC
ENSG00000142615	1	15733223	15848586	308	36	1672565	CELA2A
ENSG00000215704	1	15742404	15867895	328	30	1672565	CELA2B
ENSG00000132906	1	15767327	15903029	344	23	1672565	CASP9
ENSG00000116138	1	15803308	15968874	458	14	1672565	DNAJC16
ENSG00000116771	1	15848848	15961605	306	11	1672565	AGMAT
ENSG00000197312	1	15893995	16045539	402	12	1672565	DDI2
ENSG00000215695	1	15936364	16038217	209	12	1672565	RSC1A1
ENSG00000116786	1	15960827	16111264	326	24	1672565	PLEKHM2
ENSG00000162461	1	16012900	16117891	240	28	1672565	SLC25A34
ENSG00000162460	1	16018917	16124477	241	30	1672565	TMEM82
ENSG00000162458	1	16033102	16163089	359	38	1672565	FBLIM1
ENSG00000065526	1	16124359	16316955	383	21	1672565	SPEN
ENSG00000116809	1	16218364	16352627	348	21	1672565	ZBTB17
ENSG00000183888	1	16280731	16385302	427	28	1672565	C1orf64
ENSG00000173641	1	16290523	16396089	450	30	1672565	HSPB7
ENSG00000186510	1	16295370	16410545	474	34	1672565	CLCNKA
ENSG00000184908	1	16320272	16433803	524	32	1672565	CLCNKB
ENSG00000185519	1	16334264	16450127	468	37	1672565	FAM131C
ENSG00000142627	1	16400832	16532582	347	27	1672565	EPHA2
ENSG00000142632	1	16474349	16589104	250	23	1672565	ARHGEF19
ENSG00000204377	1	16505368	16606038	227	18	1672565	C1orf134
ENSG00000132881	1	16508195	16613657	235	19	1672565	RSG1
ENSG00000037637	1	16523334	16728949	395	16	1672565	FBXO42
ENSG00000055070	1	16629070	16774640	294	23	1672565	SZRD1
ENSG00000187144	1	16663612	16813919	336	31	1672565	SPATA21
ENSG00000157191	1	16717167	16836573	282	26	1672565	NECAP2
ENSG00000268674	1	16815561	16916070	81	11	1672565	FAM231B
ENSG00000219481	1	16838814	16990057	36	6	1672565	NBPF1
ENSG00000237847	1	16949498	17050007	14	4	1672565	FAM231A
ENSG00000268991	1	17010447	17110956	1	1	1672565	FAM231C
ENSG00000058453	1	17016768	17349474	172	26	1672565	CROCC
ENSG00000117122	1	17250997	17357330	181	27	1672565	MFAP2
ENSG00000159363	1	17262453	17388423	274	23	1672565	ATP13A2
ENSG00000117118	1	17295217	17430665	441	21	1672565	SDHB
ENSG00000117115	1	17343256	17495948	519	29	1672565	PADI2
ENSG00000142623	1	17481621	17622500	561	61	1672565	PADI1
ENSG00000142619	1	17525593	17660728	558	51	1672565	PADI3
ENSG00000159339	1	17584690	17740499	677	48	1672565	PADI4
ENSG00000269468	1	17605507	17726070	559	39	1672565	AC004824.2
ENSG00000179051	1	17683256	17816220	406	25	1672565	RCC2
ENSG00000074964	1	17816330	18074369	564	51	1672565	ARHGEF10L
ENSG00000117148	1	18031808	18203558	426	46	1672565	ACTL8
ENSG00000117154	1	18384240	18754977	1185	145	1672565	IGSF21
ENSG00000179023	1	18757424	18862478	411	50	1672565	KLHDC7A
ENSG00000009709	1	18907500	19125360	645	81	1672565	PAX7
ENSG00000179002	1	19116093	19236176	530	47	1672565	TAS1R2
ENSG00000255275	1	19125767	19297615	680	69	1672565	RP13-279N23.2
ENSG00000159423	1	19147926	19279275	536	58	1672565	ALDH4A1
ENSG00000169991	1	19180775	19333180	586	45	1672565	IFFO2
ENSG00000127481	1	19351000	19586770	538	27	1672565	UBR4
ENSG00000127463	1	19492158	19628046	380	23	1672565	EMC1
ENSG00000053372	1	19528033	19636622	333	22	1672565	MRTO4
ENSG00000162482	1	19559052	19665744	390	32	1672565	AKR7A3
ENSG00000053371	1	19580459	19688640	399	34	1672565	AKR7A2
ENSG00000040487	1	19588820	19705794	396	32	1672565	PQLC2
ENSG00000077549	1	19615267	19862066	749	40	1672565	CAPZB
ENSG00000270136	1	19873473	20034549	448	37	1672565	MINOS1-NBL1
ENSG00000173436	1	19873477	20006314	352	30	1672565	MINOS1
ENSG00000158747	1	19917048	20034945	300	31	1672565	NBL1
ENSG00000158748	1	19941780	20056055	295	31	1672565	HTR6
ENSG00000162542	1	19958706	20176438	645	81	1672565	TMCO4
ENSG00000178828	1	20090523	20191771	355	52	1672565	RNF186
ENSG00000169914	1	20159006	20289438	385	35	1672565	OTUD3
ENSG00000188784	1	20196502	20300110	290	33	1672565	PLA2G2E
ENSG00000188257	1	20251925	20356932	299	36	1672565	PLA2G2A
ENSG00000127472	1	20304672	20467683	445	40	1672565	PLA2G5
ENSG00000117215	1	20388432	20496050	287	51	1672565	PLA2G2D
ENSG00000158786	1	20415819	20526879	250	59	1672565	PLA2G2F
ENSG00000187980	1	20437746	20553917	244	46	1672565	PLA2G2C
ENSG00000162543	1	20462578	20572541	239	44	1672565	UBXN10
ENSG00000158816	1	20567412	20731387	525	38	1672565	VWA5B1
ENSG00000162545	1	20758884	20862713	201	29	1672565	CAMK2N1
ENSG00000090432	1	20775943	20884654	240	26	1672565	MUL1
ENSG00000183114	1	20828932	20931512	351	35	1672565	FAM43B
ENSG00000158825	1	20865441	20995401	494	39	1672565	CDA
ENSG00000158828	1	20909948	21028004	403	33	1672565	PINK1
ENSG00000244038	1	20928270	21038000	377	40	1672565	DDOST
ENSG00000117245	1	20940507	21094510	467	50	1672565	KIF17
ENSG00000189410	1	20996225	21109330	303	35	1672565	SH2D5
ENSG00000127483	1	21019154	21163816	296	25	1672565	HP1BP3
ENSG00000075151	1	21082963	21553377	737	22	1672565	EIF4G3
ENSG00000117298	1	21493740	21721997	565	46	1672565	ECE1
ENSG00000142794	1	21716621	21861498	422	39	1672565	NBPF3
ENSG00000162551	1	21785858	21954905	583	59	1672565	ALPL
ENSG00000076864	1	21872708	22045801	577	68	1672565	RAP1GAP
ENSG00000090686	1	21954791	22160099	598	49	1672565	USP48
ENSG00000187942	1	22088758	22201714	341	44	1672565	LDLRAD2
ENSG00000142798	1	22098738	22313790	626	54	1672565	HSPG2
ENSG00000219073	1	22253514	22375135	423	36	1672565	CELA3B
ENSG00000142789	1	22278149	22389032	401	37	1672565	CELA3A
ENSG00000070831	1	22329120	22469437	413	30	1672565	CDC42
ENSG00000162552	1	22393798	22520462	387	41	1672565	WNT4
ENSG00000184677	1	22728344	22907650	344	43	1672565	ZBTB40
ENSG00000070886	1	22840057	22980087	368	44	1672565	EPHA8
ENSG00000173372	1	22912999	23016101	277	24	1672565	C1QA
ENSG00000159189	1	22920123	23024603	272	24	1672565	C1QC
ENSG00000173369	1	22929255	23038031	254	24	1672565	C1QB
ENSG00000133216	1	22987332	23291818	603	74	1672565	EPHB2
ENSG00000215906	1	23229536	23341831	210	24	1672565	LACTBL1
ENSG00000227868	1	23287327	23392343	153	13	1672565	C1orf234
ENSG00000004487	1	23295941	23460182	217	16	1672565	KDM1A
ENSG00000169641	1	23360516	23554301	356	18	1672565	LUZP1
ENSG00000179546	1	23466993	23571222	249	17	1672565	HTR1D
ENSG00000125944	1	23580264	23720829	188	19	1672565	HNRNPR
ENSG00000125945	1	23635941	23745935	186	24	1672565	ZNF436
ENSG00000249087	1	23645490	23748332	185	25	1672565	C1orf213
ENSG00000204219	1	23657554	23801233	273	27	1672565	TCEA3
ENSG00000088280	1	23705056	23861061	339	26	1672565	ASAP3
ENSG00000007968	1	23782922	23907712	257	28	1672565	E2F2
ENSG00000117318	1	23834409	23936285	157	27	1672565	ID3
ENSG00000197880	1	23857985	24017058	290	46	1672565	MDS2
ENSG00000142676	1	23968269	24072915	176	26	1672565	RPL11
ENSG00000011007	1	24019645	24138549	100	13	1672565	TCEB3
ENSG00000057757	1	24054895	24164722	83	9	1672565	PITHD1
ENSG00000011009	1	24067460	24172029	80	8	1672565	LYPLA2
ENSG00000117308	1	24072089	24177271	81	9	1672565	GALE
ENSG00000117305	1	24078375	24215110	212	14	1672565	HMGCL
ENSG00000179163	1	24121567	24244784	261	13	1672565	FUCA1
ENSG00000188822	1	24147016	24335549	251	17	1672565	CNR2
ENSG00000189266	1	24235599	24339952	14	7	1672565	PNRC2
ENSG00000188529	1	24241294	24357417	11	7	1672565	SRSF10
ENSG00000142661	1	24332525	24488665	379	40	1672565	MYOM3
ENSG00000142677	1	24396261	24519611	363	38	1672565	IL22RA1
ENSG00000185436	1	24430647	24564449	391	49	1672565	IFNLR1
ENSG00000158055	1	24595812	24740972	373	33	1672565	GRHL3
ENSG00000001460	1	24633489	24793424	399	30	1672565	STPG1
ENSG00000001461	1	24692284	24849466	350	25	1672565	NIPAL3
ENSG00000117602	1	24779387	24917530	389	38	1672565	RCAN3
ENSG00000184454	1	24832602	24985819	436	42	1672565	NCMAP
ENSG00000133226	1	24908207	25049758	264	20	1672565	SRRM1
ENSG00000169504	1	25021848	25220815	328	25	1672565	CLIC4
ENSG00000020633	1	25176002	25341612	446	55	1672565	RUNX3
ENSG00000117614	1	25499170	25608993	92	34	1672565	SYF2
ENSG00000117616	1	25518728	25714704	92	23	1672565	C1orf63
ENSG00000187010	1	25548884	25706936	66	17	1672565	RHD
ENSG00000183726	1	25614408	25738852	57	7	1672565	TMEM50A
ENSG00000188672	1	25638740	25806683	148	7	1672565	RHCE
ENSG00000204178	1	25707388	25876700	205	8	1672565	TMEM57
ENSG00000157978	1	25820071	25945377	163	24	1672565	LDLRAP1
ENSG00000117643	1	25893959	26162698	394	38	1672565	MAN1C1
ENSG00000162430	1	26076667	26194713	223	15	1672565	SEPN1
ENSG00000255054	1	26087961	26200235	206	13	1672565	RP1-317E23.6
ENSG00000117640	1	26095131	26209432	205	13	1672565	MTFR1L
ENSG00000223474	1	26095212	26197288	191	11	1672565	AL020996.1
ENSG00000127423	1	26108414	26235903	213	12	1672565	AUNIP
ENSG00000182749	1	26137701	26247744	163	9	1672565	PAQR7
ENSG00000117632	1	26160672	26283482	186	16	1672565	STMN1
ENSG00000158006	1	26236258	26374648	242	19	1672565	PAFAH2
ENSG00000158008	1	26296375	26412955	223	18	1672565	EXTL1
ENSG00000158014	1	26313743	26422624	191	17	1672565	SLC30A2
ENSG00000158022	1	26327795	26444927	218	14	1672565	TRIM63
ENSG00000175087	1	26387664	26502034	222	10	1672565	PDIK1L
ENSG00000197245	1	26435511	26539119	225	20	1672565	FAM110D
ENSG00000142684	1	26446362	26548551	250	27	1672565	ZNF593
ENSG00000142675	1	26453894	26566377	296	24	1672565	CNKSR1
ENSG00000188782	1	26467052	26579459	321	27	1672565	CATSPER4
ENSG00000130695	1	26510691	26655299	425	21	1672565	CEP85
ENSG00000142669	1	26555667	26658007	294	13	1672565	SH3BGRL3
ENSG00000158062	1	26557819	26694854	395	22	1672565	UBXN11
ENSG00000169442	1	26594448	26697014	296	20	1672565	CD52
ENSG00000176092	1	26598350	26730621	377	30	1672565	AIM1L
ENSG00000176083	1	26638125	26751013	312	33	1672565	ZNF683
ENSG00000131914	1	26687269	26806213	242	39	1672565	LIN28A
ENSG00000117682	1	26708773	26847785	257	25	1672565	DHDDS
ENSG00000198830	1	26748941	26852463	173	19	1672565	HMGN2
ENSG00000117676	1	26806252	26951521	241	30	1672565	RPS6KA1
ENSG00000117713	1	26972524	27158595	195	14	1672565	ARID1A
ENSG00000060642	1	27063963	27174889	109	10	1672565	PIGV
ENSG00000204160	1	27103201	27234093	132	11	1672565	ZDHHC18
ENSG00000175793	1	27139633	27240947	120	11	1672565	SFN
ENSG00000142751	1	27152624	27266788	133	12	1672565	GPN2
ENSG00000198746	1	27166979	27276957	127	12	1672565	GPATCH3
ENSG00000090273	1	27176729	27323353	162	14	1672565	NUDC
ENSG00000131910	1	27187980	27290457	113	11	1672565	NR0B2
ENSG00000175707	1	27226053	27336897	115	11	1672565	C1orf172
ENSG00000253368	1	27270198	27377389	134	16	1672565	TRNP1
ENSG00000158246	1	27281511	27389327	145	17	1672565	FAM46B
ENSG00000090020	1	27375306	27543472	249	17	1672565	SLC9A1
ENSG00000142784	1	27511007	27685110	253	19	1672565	WDTC1
ENSG00000186501	1	27598651	27712891	174	24	1672565	TMEM222
ENSG00000142765	1	27618513	27730421	162	26	1672565	SYTL1
ENSG00000142733	1	27631675	27743383	165	28	1672565	MAP3K6
ENSG00000142748	1	27645603	27751315	152	26	1672565	FCN3
ENSG00000174950	1	27655666	27759870	150	24	1672565	CD164L2
ENSG00000181773	1	27669148	27772318	129	19	1672565	GPR3
ENSG00000158195	1	27680730	27866669	228	14	1672565	WASF2
ENSG00000126705	1	27810546	27980942	198	26	1672565	AHDC1
ENSG00000000938	1	27888575	28011788	156	26	1672565	FGR
ENSG00000126709	1	27942572	28048729	174	19	1672565	IFI6
ENSG00000009780	1	28002490	28139633	189	9	1672565	FAM76A
ENSG00000117758	1	28049694	28200963	175	10	1672565	STX12
ENSG00000117751	1	28107289	28228187	164	20	1672565	PPP1R8
ENSG00000268552	1	28127085	28227255	139	17	1672565	AL109927.1
ENSG00000130775	1	28149055	28263196	233	21	1672565	THEMIS2
ENSG00000117748	1	28168035	28291257	283	19	1672565	RPA2
ENSG00000130768	1	28211504	28335668	268	22	1672565	SMPDL3B
ENSG00000158156	1	28235973	28344607	233	24	1672565	XKR8
ENSG00000158161	1	28246855	28465207	406	34	1672565	EYA3
ENSG00000169403	1	28423677	28570447	243	26	1672565	PTAFR
ENSG00000126698	1	28475967	28609536	245	18	1672565	DNAJC8
ENSG00000215902	1	28477013	28577152	180	14	1672565	AL353354.1
ENSG00000269804	1	28477070	28577419	182	14	1672565	AL353354.2
ENSG00000130770	1	28512620	28623417	244	18	1672565	ATPIF1
ENSG00000130766	1	28536038	28659002	246	22	1672565	SESN2
ENSG00000130772	1	28605513	28712476	206	12	1672565	MED18
ENSG00000204138	1	28646114	28876881	485	11	1672565	PHACTR4
ENSG00000180198	1	28782455	28915812	224	13	1672565	RCC1
ENSG00000180098	1	28829597	28955051	166	16	1672565	TRNAU1AP
ENSG00000120656	1	28865835	29019597	173	19	1672565	TAF12
ENSG00000188060	1	28868712	28971955	110	14	1672565	RAB42
ENSG00000162419	1	28945244	29095865	178	16	1672565	GMEB1
ENSG00000198492	1	29013133	29146287	202	19	1672565	YTHDF2
ENSG00000116329	1	29088654	29240208	352	35	1672565	OPRD1
ENSG00000159023	1	29163603	29496553	589	32	1672565	EPB41
ENSG00000253304	1	29395940	29500447	174	22	1672565	TMEM200B
ENSG00000116350	1	29424255	29558499	265	20	1672565	SRSF4
ENSG00000116353	1	29469385	29607454	270	21	1672565	MECR
ENSG00000060656	1	29513028	29703325	409	43	1672565	PTPRU
ENSG00000162510	1	31134124	31246434	333	32	1672565	MATN1
ENSG00000162511	1	31155316	31280667	365	42	1672565	LAPTM5
ENSG00000162512	1	31292314	31431608	326	52	1672565	SDC3
ENSG00000134644	1	31354353	31588838	438	27	1672565	PUM1
ENSG00000084628	1	31602592	31762401	403	22	1672565	NKAIN1
ENSG00000060688	1	31682417	31819662	363	14	1672565	SNRNP40
ENSG00000121766	1	31719842	31887783	405	13	1672565	ZCCHC17
ENSG00000121769	1	31788472	31899697	274	11	1672565	FABP3
ENSG00000168528	1	31832412	31957525	356	18	1672565	SERINC2
ENSG00000268950	1	31852192	31952614	300	15	1672565	AC114494.1
ENSG00000142910	1	31992116	32103288	257	26	1672565	TINAGL1
ENSG00000121764	1	32033287	32148119	186	17	1672565	HCRTR1
ENSG00000162517	1	32045463	32160497	177	15	1672565	PEF1
ENSG00000084636	1	32067848	32219920	219	24	1672565	COL16A1
ENSG00000121753	1	32142718	32280494	151	27	1672565	BAI2
ENSG00000134668	1	32206023	32331652	177	27	1672565	SPOCD1
ENSG00000184007	1	32322022	32460457	211	30	1672565	PTP4A2
ENSG00000212673	1	32329174	32430745	141	20	1672565	AL136115.1
ENSG00000121774	1	32429430	32576451	141	19	1672565	KHDRBS1
ENSG00000121775	1	32487632	32618467	97	13	1672565	TMEM39B
ENSG00000025800	1	32523639	32692169	152	11	1672565	KPNA6
ENSG00000084652	1	32595287	32713886	118	8	1672565	TXLNA
ENSG00000160050	1	32615987	32720988	113	9	1672565	CCDC28B
ENSG00000160051	1	32621236	32724288	116	9	1672565	IQCC
ENSG00000222046	1	32624695	32731797	117	10	1672565	DCDC2B
ENSG00000160055	1	32630073	32737972	115	11	1672565	TMEM234
ENSG00000084623	1	32637529	32747205	114	11	1672565	EIF3I
ENSG00000183615	1	32662834	32764457	102	13	1672565	FAM167B
ENSG00000182866	1	32666840	32801766	111	16	1672565	LCK
ENSG00000116478	1	32707687	32849236	82	27	1672565	HDAC1
ENSG00000175130	1	32749433	32851980	45	22	1672565	MARCKSL1
ENSG00000162526	1	32767122	32879913	44	22	1672565	TSSK3
ENSG00000225828	1	32776871	32879879	38	20	1672565	FAM229A
ENSG00000160058	1	32780704	32910332	74	14	1672565	BSDC1
ENSG00000254553	1	32880658	33116393	408	20	1672565	RP1-27O5.3
ENSG00000273274	1	32880670	33012287	198	15	1672565	ZBTB8B
ENSG00000160062	1	32955028	33121540	337	15	1672565	ZBTB8A
ENSG00000176261	1	33015773	33166504	301	14	1672565	ZBTB8OS
ENSG00000162521	1	33066743	33201812	272	9	1672565	RBBP4
ENSG00000162520	1	33095507	33219197	227	11	1672565	SYNC
ENSG00000162522	1	33157486	33290571	205	26	1672565	KIAA1522
ENSG00000134684	1	33190840	33333754	193	21	1672565	YARS
ENSG00000116497	1	33232368	33374476	168	16	1672565	S100PBP
ENSG00000160097	1	33277869	33388083	122	15	1672565	FNDC5
ENSG00000121905	1	33301595	33414042	142	18	1672565	HPCA
ENSG00000121900	1	33310195	33417039	137	18	1672565	TMEM54
ENSG00000116514	1	33352046	33480286	162	17	1672565	RNF19B
ENSG00000267885	1	33389268	33489642	135	15	1672565	FKSG48
ENSG00000004455	1	33423585	33596597	205	15	1672565	AK2
ENSG00000142920	1	33496705	33636131	182	13	1672565	ADC
ENSG00000116525	1	33561003	33697660	207	12	1672565	TRIM62
ENSG00000160094	1	33672146	33816320	266	21	1672565	ZNF362
ENSG00000184389	1	33722367	33836699	225	25	1672565	A3GALT2
ENSG00000134686	1	33739224	33946653	504	23	1672565	PHC2
ENSG00000121903	1	33888246	34012107	307	28	1672565	ZSCAN20
ENSG00000121904	1	33929609	34681443	1859	165	1672565	CSMD2
ENSG00000176256	1	34276076	34380392	278	22	1672565	HMGB4
ENSG00000142698	1	34582484	34734732	420	46	1672565	C1orf94
ENSG00000163866	1	35128338	35375417	750	79	1672565	SMIM12
ENSG00000189280	1	35170648	35274113	336	51	1672565	GJB5
ENSG00000189433	1	35175342	35279325	329	50	1672565	GJB4
ENSG00000188910	1	35196790	35301970	340	45	1672565	GJB3
ENSG00000187513	1	35208599	35311348	349	39	1672565	GJA4
ENSG00000116544	1	35281037	35445186	296	47	1672565	DLGAP3
ENSG00000271741	1	35397134	35547342	156	8	1672565	RP11-244H3.4
ENSG00000243749	1	35397136	35500954	113	7	1672565	ZMYM6NB
ENSG00000163867	1	35399523	35547569	149	7	1672565	ZMYM6
ENSG00000197056	1	35475387	35631460	159	10	1672565	ZMYM1
ENSG00000116560	1	35591979	35708749	144	15	1672565	SFPQ
ENSG00000146463	1	35684568	35937659	207	13	1672565	ZMYM4
ENSG00000142687	1	35849091	36073551	158	12	1672565	KIAA0319L
ENSG00000020129	1	35973074	36082875	85	8	1672565	NCDN
ENSG00000116819	1	35988971	36110929	82	9	1672565	TFAP2E
ENSG00000126067	1	36017185	36157445	86	9	1672565	PSMB2
ENSG00000142686	1	36129476	36235073	97	11	1672565	C1orf216
ENSG00000092853	1	36135819	36285568	165	14	1672565	CLSPN
ENSG00000134698	1	36223773	36373491	163	17	1672565	AGO4
ENSG00000092847	1	36285409	36445211	137	14	1672565	AGO1
ENSG00000126070	1	36346319	36588101	202	17	1672565	AGO3
ENSG00000092850	1	36499676	36603876	102	13	1672565	TEKT2
ENSG00000116863	1	36504476	36609533	104	13	1672565	ADPRHL2
ENSG00000171812	1	36510837	36640821	139	16	1672565	COL8A2
ENSG00000054116	1	36552173	36665098	143	17	1672565	TRAPPC3
ENSG00000116871	1	36571180	36696450	158	22	1672565	MAP7D1
ENSG00000054118	1	36640017	36820958	187	18	1672565	THRAP3
ENSG00000214193	1	36721988	36840484	125	11	1672565	SH3D21
ENSG00000142694	1	36737632	36839755	105	10	1672565	EVA1B
ENSG00000116883	1	36739335	36844822	110	10	1672565	RP11-268J15.5
ENSG00000196182	1	36755225	36901497	313	23	1672565	STK40
ENSG00000181817	1	36806839	36913493	295	18	1672565	LSM10
ENSG00000116885	1	36831428	36966086	415	21	1672565	OSCP1
ENSG00000116898	1	36871319	36980038	356	26	1672565	MRPS15
ENSG00000119535	1	36881644	36998879	358	32	1672565	CSF3R
ENSG00000163873	1	37211128	37549730	607	60	1672565	GRIK3
ENSG00000163874	1	37890153	37999980	258	30	1672565	ZC3H12A
ENSG00000163875	1	37908176	38030375	267	28	1672565	MEAF6
ENSG00000163877	1	37950050	38069903	251	25	1672565	SNIP1
ENSG00000163879	1	37972520	38082458	215	22	1672565	DNALI1
ENSG00000134697	1	37982417	38111536	276	22	1672565	GNL2
ENSG00000169218	1	38026951	38150595	277	34	1672565	RSPO1
ENSG00000116922	1	38097242	38207914	292	34	1672565	C1orf109
ENSG00000134690	1	38108090	38225391	322	32	1672565	CDCA8
ENSG00000183317	1	38129552	38280805	396	37	1672565	EPHA10
ENSG00000185090	1	38209474	38316809	228	24	1672565	MANEAL
ENSG00000196449	1	38218616	38323857	207	24	1672565	YRDC
ENSG00000197982	1	38222651	38325126	191	22	1672565	C1orf122
ENSG00000188786	1	38225239	38375292	262	19	1672565	MTF1
ENSG00000230610	1	38242232	38343886	160	19	1672565	AL929472.1
ENSG00000204084	1	38276369	38462729	327	20	1672565	INPP5B
ENSG00000183431	1	38372647	38506593	255	27	1672565	SF3A3
ENSG00000183386	1	38412442	38521278	199	31	1672565	FHL3
ENSG00000183520	1	38424930	38540496	218	35	1672565	UTP11L
ENSG00000185668	1	38459523	38562450	202	26	1672565	POU3F1
ENSG00000116954	1	39253870	39375495	268	32	1672565	RRAGC
ENSG00000214114	1	39278636	39397289	291	24	1672565	MYCBP
ENSG00000131233	1	39280175	39397289	286	22	1672565	GJA9
ENSG00000158315	1	39301479	39457471	384	37	1672565	RHBDL2
ENSG00000174574	1	39406895	39521731	322	23	1672565	AKIRIN1
ENSG00000168653	1	39441990	39550308	300	15	1672565	NDUFS5
ENSG00000127603	1	39496988	40002849	863	33	1672565	MACF1
ENSG00000255103	1	39826151	39932154	150	17	1672565	KIAA0754
ENSG00000183682	1	39907318	40041607	233	29	1672565	BMP8A
ENSG00000090621	1	39976488	40092462	232	23	1672565	PABPC4
ENSG00000163909	1	40039825	40155617	304	37	1672565	HEYL
ENSG00000116981	1	40074793	40187710	316	38	1672565	NT5C1A
ENSG00000116983	1	40094320	40207361	301	36	1672565	HPCAL4
ENSG00000084072	1	40107854	40279586	489	58	1672565	PPIE
ENSG00000116985	1	40172854	40304533	395	40	1672565	BMP8B
ENSG00000198754	1	40185195	40287020	302	28	1672565	OXCT2
ENSG00000043514	1	40256723	40399183	383	27	1672565	TRIT1
ENSG00000116990	1	40311098	40417928	231	25	1672565	MYCL
ENSG00000168389	1	40370802	40485638	227	37	1672565	MFSD2A
ENSG00000131236	1	40455905	40588321	361	17	1672565	CAP1
ENSG00000131238	1	40488379	40613375	309	16	1672565	PPT1
ENSG00000117000	1	40577045	40756593	187	22	1672565	RLF
ENSG00000188800	1	40661619	40767363	106	18	1672565	TMCO2
ENSG00000084073	1	40673779	40809856	238	31	1672565	ZMPSTE24
ENSG00000049089	1	40716159	40833488	249	34	1672565	COL9A2
ENSG00000084070	1	40760522	40938998	466	58	1672565	SMAP2
ENSG00000187801	1	40865774	40979390	310	39	1672565	ZFP69B
ENSG00000187815	1	40892887	41012015	352	32	1672565	ZFP69
ENSG00000164002	1	40924413	41032228	316	21	1672565	EXO5
ENSG00000117010	1	40947233	41063841	348	21	1672565	ZNF684
ENSG00000117016	1	41036351	41181329	333	31	1672565	RIMS3
ENSG00000066136	1	41107320	41287275	421	35	1672565	NFYC
ENSG00000117013	1	41199684	41356124	473	75	1672565	KCNQ4
ENSG00000179862	1	41276729	41378018	362	59	1672565	CITED4
ENSG00000171793	1	41395007	41528235	375	36	1672565	CTPS1
ENSG00000171790	1	41431269	41538909	265	23	1672565	SLFNL1
ENSG00000010803	1	41442872	41757826	668	25	1672565	SCMH1
ENSG00000204060	1	41777594	41899262	363	41	1672565	FOXO6
ENSG00000127129	1	41894446	42000344	315	42	1672565	EDN2
ENSG00000127124	1	41922036	42551596	1459	68	1672565	HIVEP3
ENSG00000044012	1	42569092	42671495	197	21	1672565	GUCA2B
ENSG00000197273	1	42578362	42680389	178	20	1672565	GUCA2A
ENSG00000198815	1	42592210	42851548	396	22	1672565	FOXJ3
ENSG00000177181	1	42796466	42938249	333	23	1672565	RIMKLA
ENSG00000066185	1	42846000	42971938	314	16	1672565	ZMYND12
ENSG00000127125	1	42871788	42989056	281	14	1672565	PPCS
ENSG00000186409	1	42879001	43170335	706	24	1672565	CCDC30
ENSG00000171960	1	43074096	43192429	215	22	1672565	PPIH
ENSG00000065978	1	43098098	43218020	222	25	1672565	YBX1
ENSG00000164007	1	43148764	43255925	178	23	1672565	CLDN19
ENSG00000117385	1	43162006	43282755	205	24	1672565	LEPRE1
ENSG00000164008	1	43182940	43313968	209	25	1672565	C1orf50
ENSG00000177868	1	43222723	43332954	174	24	1672565	CCDC23
ENSG00000164010	1	43232795	43360660	207	28	1672565	ERMAP
ENSG00000164011	1	43262280	43368148	183	27	1672565	ZNF691
ENSG00000117394	1	43341052	43474530	373	34	1672565	SLC2A1
ENSG00000186973	1	43560824	43672067	349	18	1672565	FAM183A
ENSG00000117395	1	43579846	43786607	556	34	1672565	EBNA1BP2
ENSG00000243710	1	43587820	43770029	534	33	1672565	WDR65
ENSG00000179178	1	43685665	43789673	209	34	1672565	TMEM125
ENSG00000253313	1	43697554	43801288	182	28	1672565	C1orf210
ENSG00000066056	1	43716664	43838779	176	29	1672565	TIE1
ENSG00000117400	1	43753478	43868443	132	14	1672565	MPL
ENSG00000117399	1	43774626	43878874	111	11	1672565	CDC20
ENSG00000066322	1	43779068	43883696	116	12	1672565	ELOVL1
ENSG00000159479	1	43799588	43905479	125	12	1672565	MED8
ENSG00000198198	1	43805553	43968321	186	16	1672565	SZT2
ENSG00000178922	1	43866824	43969660	116	12	1672565	HYI
ENSG00000142949	1	43940858	44139343	377	19	1672565	PTPRF
ENSG00000066135	1	44065829	44221186	258	14	1672565	KDM4A
ENSG00000126091	1	44121495	44446831	581	23	1672565	ST3GAL3
ENSG00000117407	1	44348992	44452913	188	18	1672565	ARTN
ENSG00000117408	1	44362611	44483694	216	20	1672565	IPO13
ENSG00000132768	1	44385672	44489041	175	18	1672565	DPH2
ENSG00000117410	1	44390159	44493967	170	18	1672565	ATP6V0B
ENSG00000117411	1	44394615	44506840	191	25	1672565	B4GALT2
ENSG00000159214	1	44407031	44512200	177	28	1672565	CCDC24
ENSG00000196517	1	44407172	44547139	271	34	1672565	SLC6A9
ENSG00000171872	1	44534522	44650812	302	25	1672565	KLF17
ENSG00000178028	1	44629127	44736353	118	14	1672565	DMAP1
ENSG00000117419	1	44636742	44870932	302	21	1672565	ERI3
ENSG00000187147	1	44820866	45167396	750	87	1672565	RNF220
ENSG00000126106	1	45050910	45190227	254	25	1672565	TMEM53
ENSG00000198520	1	45090364	45241263	238	27	1672565	C1orf228
ENSG00000142945	1	45155490	45283439	188	18	1672565	KIF2C
ENSG00000142937	1	45190923	45294451	161	13	1672565	RPS8
ENSG00000142959	1	45199257	45303377	161	13	1672565	BEST4
ENSG00000173846	1	45215897	45321662	173	12	1672565	PLK3
ENSG00000188396	1	45221585	45322957	167	12	1672565	TCTEX1D4
ENSG00000222009	1	45224154	45331257	172	12	1672565	BTBD19
ENSG00000117425	1	45235516	45358735	193	13	1672565	PTCH2
ENSG00000070785	1	45266450	45502282	466	15	1672565	EIF2B3
ENSG00000126107	1	45418212	45527001	229	15	1672565	HECTD3
ENSG00000126088	1	45427819	45531247	212	14	1672565	UROD
ENSG00000162415	1	45432071	45821881	621	25	1672565	ZSWIM5
ENSG00000186603	1	45742545	45844347	135	22	1672565	HPDL
ENSG00000132781	1	45744835	45856142	136	20	1672565	MUTYH
ENSG00000132773	1	45755342	45859647	116	16	1672565	TOE1
ENSG00000070759	1	45759555	46006872	330	18	1672565	TESK2
ENSG00000236624	1	45909538	46015751	185	12	1672565	CCDC163P
ENSG00000132763	1	45915725	46026739	202	13	1672565	MMACHC
ENSG00000117450	1	45926708	46038719	195	13	1672565	PRDX1
ENSG00000117448	1	45966215	46085721	191	16	1672565	AKR1A1
ENSG00000132780	1	45999518	46134566	223	14	1672565	NASP
ENSG00000159588	1	46035716	46139729	167	9	1672565	CCDC17
ENSG00000159592	1	46042976	46203785	250	9	1672565	GPBP1L1
ENSG00000159596	1	46102886	46210115	173	7	1672565	TMEM69
ENSG00000197429	1	46109996	46266322	273	8	1672565	IPP
ENSG00000086015	1	46202659	46551796	617	12	1672565	MAST2
ENSG00000117461	1	46455812	46692160	329	19	1672565	PIK3R3
ENSG00000117472	1	46590745	46701630	119	18	1672565	TSPAN1
ENSG00000085998	1	46604354	46735977	127	19	1672565	POMGNT1
ENSG00000171357	1	46619006	46736933	118	18	1672565	LURAP1
ENSG00000085999	1	46663360	46794145	112	17	1672565	RAD54L
ENSG00000132128	1	46676868	46819280	200	16	1672565	LRRC41
ENSG00000173660	1	46719303	46832448	223	11	1672565	UQCRH
ENSG00000117481	1	46755849	46880824	313	9	1672565	NSUN4
ENSG00000117480	1	46809937	46929520	342	25	1672565	FAAH
ENSG00000197587	1	46922668	47029898	244	33	1672565	DMBX1
ENSG00000162456	1	46961316	47067199	230	30	1672565	KNCN
ENSG00000079277	1	46973090	47132515	321	27	1672565	MKNK1
ENSG00000142961	1	47023387	47132563	192	18	1672565	MOB3C
ENSG00000123472	1	47048409	47189539	250	15	1672565	ATPAF1
ENSG00000159658	1	47074366	47234824	285	15	1672565	EFCAB14
ENSG00000186118	1	47084527	47189266	178	8	1672565	TEX38
ENSG00000142973	1	47173510	47335085	321	36	1672565	CYP4B1
ENSG00000187048	1	47344849	47457156	153	14	1672565	CYP4A11
ENSG00000186377	1	47377036	47566423	293	17	1672565	CYP4X1
ENSG00000186160	1	47483160	47633991	320	10	1672565	CYP4Z1
ENSG00000162365	1	47553107	47665413	257	16	1672565	CYP4A22
ENSG00000162366	1	47599265	47706716	248	31	1672565	PDZK1IP1
ENSG00000162367	1	47631962	47747892	260	25	1672565	TAL1
ENSG00000123473	1	47665811	47829819	377	22	1672565	STIL
ENSG00000162368	1	47749469	47894511	284	15	1672565	CMPK1
ENSG00000186790	1	47831744	47933723	194	20	1672565	FOXE3
ENSG00000186564	1	47851689	47956363	221	25	1672565	FOXD2
ENSG00000269113	1	48176200	48512567	738	50	1672565	TRABD2B
ENSG00000273395	1	48176979	48277290	221	40	1672565	FLJ00388
ENSG00000269709	1	48519306	48619878	276	35	1672565	AL109659.1
ENSG00000117834	1	48638357	48764316	281	19	1672565	SLC5A9
ENSG00000132122	1	48711044	48987845	493	35	1672565	SPATA6
ENSG00000186094	1	48948527	50539585	2080	55	1672565	AGBL4
ENSG00000162373	1	49143195	49292641	237	36	1672565	BEND5
ENSG00000227839	1	50409990	50511874	83	12	1672565	AL645730.2
ENSG00000162374	1	50463686	50719458	287	29	1672565	ELAVL4
ENSG00000142700	1	50833222	50939172	209	12	1672565	DMRTA2
ENSG00000185104	1	50855150	51475935	752	23	1672565	FAF1
ENSG00000123080	1	51376417	51490305	135	14	1672565	CDKN2C
ENSG00000204006	1	51517906	51663752	204	16	1672565	C1orf185
ENSG00000123091	1	51651943	51789127	147	14	1672565	RNF11
ENSG00000085831	1	51702930	51860788	285	21	1672565	TTC39A
ENSG00000085832	1	51769935	52035000	654	24	1672565	EPS15
ENSG00000117859	1	51992851	52304889	447	43	1672565	OSBPL9
ENSG00000078618	1	52204863	52394477	323	28	1672565	NRD1
ENSG00000169213	1	52323628	52506436	323	21	1672565	RAB3B
ENSG00000117862	1	52435803	52571843	167	12	1672565	TXNDC12
ENSG00000198841	1	52447775	52549488	135	9	1672565	KTI12
ENSG00000134717	1	52471797	52606388	152	12	1672565	BTF3L4
ENSG00000157077	1	52558046	52862358	271	14	1672565	ZFYVE9
ENSG00000154222	1	52761395	52881865	96	11	1672565	CC2D1B
ENSG00000085840	1	52788501	52920131	126	13	1672565	ORC1
ENSG00000134748	1	52820236	52936511	113	14	1672565	PRPF38A
ENSG00000134744	1	52823954	53069159	341	21	1672565	ZCCHC11
ENSG00000116157	1	53018044	53124723	240	32	1672565	GPX7
ENSG00000182183	1	53049016	53185355	310	32	1672565	FAM159A
ENSG00000162377	1	53102508	53214038	278	19	1672565	COA7
ENSG00000162378	1	53142126	53343014	450	18	1672565	ZYG11B
ENSG00000203995	1	53258183	53410670	235	18	1672565	ZYG11A
ENSG00000121310	1	53311656	53442884	205	16	1672565	ECHDC2
ENSG00000116171	1	53342901	53567375	661	22	1672565	SCP2
ENSG00000174348	1	53477854	53601174	543	27	1672565	PODN
ENSG00000162383	1	53502855	53658289	606	48	1672565	SLC1A7
ENSG00000157184	1	53612101	53729869	235	35	1672565	CPT2
ENSG00000162384	1	53629771	53736289	176	23	1672565	C1orf123
ENSG00000162385	1	53642564	53754282	162	16	1672565	MAGOH
ENSG00000157193	1	53661217	53843742	383	41	1672565	LRP8
ENSG00000143006	1	53875072	53983161	272	20	1672565	DMRTB1
ENSG00000174332	1	53921910	54249877	750	59	1672565	GLIS1
ENSG00000058804	1	54181133	54354533	315	27	1672565	NDC1
ENSG00000058799	1	54267392	54406407	317	21	1672565	YIPF1
ENSG00000211452	1	54306912	54426759	295	22	1672565	DIO1
ENSG00000081870	1	54332247	54461602	317	28	1672565	HSPB11
ENSG00000116212	1	54361750	54483841	278	22	1672565	LRRC42
ENSG00000203985	1	54424412	54533856	245	27	1672565	LDLRAD1
ENSG00000116209	1	54447347	54569177	263	21	1672565	TMEM59
ENSG00000116205	1	54469260	54628192	382	33	1672565	TCEANC2
ENSG00000212670	1	54519968	54621750	253	29	1672565	AL161915.1
ENSG00000157211	1	54548747	54669443	299	37	1672565	CDCP2
ENSG00000256407	1	54556897	54715746	384	51	1672565	RP11-446E24.4
ENSG00000248835	1	54585333	54687997	267	37	1672565	AL357673.1
ENSG00000215883	1	54588009	54715709	319	44	1672565	CYB5RL
ENSG00000116221	1	54599714	54741137	342	47	1672565	MRPL37
ENSG00000157216	1	54641105	54929152	733	87	1672565	SSBP3
ENSG00000198711	1	54653710	54754736	218	33	1672565	SSBP3-AS1
ENSG00000162390	1	54957930	55154865	654	69	1672565	ACOT11
ENSG00000162391	1	55024855	55139229	412	34	1672565	FAM151A
ENSG00000271723	1	55057459	55257981	660	47	1672565	MROH7-TTC4
ENSG00000184313	1	55057463	55225939	574	49	1672565	MROH7
ENSG00000243725	1	55131495	55258330	418	27	1672565	TTC4
ENSG00000162396	1	55172571	55280187	377	32	1672565	PARS2
ENSG00000006555	1	55195385	55316940	432	33	1672565	TTC22
ENSG00000162398	1	55221736	55357925	446	29	1672565	C1orf177
ENSG00000116133	1	55265306	55402891	468	30	1672565	DHCR24
ENSG00000143001	1	55396465	55507966	393	46	1672565	TMEM61
ENSG00000162399	1	55414606	55526556	418	61	1672565	BSND
ENSG00000169174	1	55455221	55580525	366	53	1672565	PCSK9
ENSG00000162402	1	55482032	55730786	588	40	1672565	USP24
ENSG00000162407	1	56910419	57160974	785	45	1672565	PPAP2B
ENSG00000162409	1	57060995	57231008	582	40	1672565	PRKAA2
ENSG00000187889	1	57134477	57335369	607	83	1672565	C1orf168
ENSG00000157131	1	57270479	57433894	503	49	1672565	C8A
ENSG00000021852	1	57344883	57481813	440	39	1672565	C8B
ENSG00000173406	1	57410451	59062406	4577	259	1672565	DAB1
ENSG00000162600	1	58831056	59062474	837	46	1672565	OMA1
ENSG00000184292	1	58991099	59093166	439	24	1672565	TACSTD2
ENSG00000162601	1	59070411	59215764	431	20	1672565	MYSM1
ENSG00000177606	1	59196465	59299785	164	25	1672565	JUN
ENSG00000172456	1	59712310	60283347	1147	87	1672565	FGGY
ENSG00000134709	1	60230458	60392050	315	24	1672565	HOOK1
ENSG00000134716	1	60308980	60442462	282	17	1672565	CYP2J2
ENSG00000162598	1	60402941	60589442	405	42	1672565	C1orf87
ENSG00000162599	1	61280931	61978465	1537	159	1672565	NFIA
ENSG00000162604	1	62096718	62241095	288	30	1672565	TM2D1
ENSG00000132849	1	62158149	62679592	1461	102	1672565	INADL
ENSG00000240563	1	62610503	62728000	514	38	1672565	L1TD1
ENSG00000132854	1	62652651	62835085	682	46	1672565	KANK4
ENSG00000162607	1	62851968	62967475	193	20	1672565	USP1
ENSG00000116641	1	62870399	63203969	389	11	1672565	DOCK7
ENSG00000132855	1	63013158	63121830	103	6	1672565	ANGPTL3
ENSG00000269624	1	63023437	63125249	99	6	1672565	AL138847.1
ENSG00000125703	1	63199806	63381184	353	15	1672565	ATG4C
ENSG00000187140	1	63738730	63840797	235	51	1672565	FOXD3
ENSG00000088035	1	63783261	63954233	355	40	1672565	ALG6
ENSG00000142856	1	63856441	64109392	558	30	1672565	ITGB3BP
ENSG00000203965	1	63939043	64088364	331	18	1672565	EFCAB7
ENSG00000116652	1	63964588	64065405	212	15	1672565	DLEU2L
ENSG00000079739	1	64008947	64175916	495	48	1672565	PGM1
ENSG00000185483	1	64189693	64697181	1175	76	1672565	ROR1
ENSG00000177414	1	64619310	64783051	430	27	1672565	UBE2U
ENSG00000158966	1	64886428	65208741	626	86	1672565	CACHD1
ENSG00000162437	1	65160778	65348915	361	29	1672565	RAVER2
ENSG00000162434	1	65248912	65482187	495	37	1672565	JAK1
ENSG00000162433	1	65563232	65747828	435	42	1672565	AK4
ENSG00000116675	1	65663902	65931552	632	47	1672565	DNAJC6
ENSG00000116678	1	65836248	66157242	895	38	1672565	LEPR
ENSG00000213625	1	65836270	65951690	291	32	1672565	LEPROT
ENSG00000184588	1	66208197	66890259	1517	79	1672565	PDE4B
ENSG00000118473	1	66949066	67263982	1037	33	1672565	SGIP1
ENSG00000248458	1	67081547	67192710	325	18	1672565	AL139147.1
ENSG00000152760	1	67168142	67294470	294	32	1672565	TCTEX1D1
ENSG00000172410	1	67213424	67316939	237	38	1672565	INSL5
ENSG00000152763	1	67228568	67440570	415	45	1672565	WDR78
ENSG00000198160	1	67340578	67504302	346	18	1672565	MIER1
ENSG00000116704	1	67415015	67569782	440	27	1672565	SLC35D1
ENSG00000203963	1	67507848	67747536	711	46	1672565	C1orf141
ENSG00000162594	1	67582083	67775662	504	38	1672565	IL23R
ENSG00000081985	1	67723047	67912583	422	38	1672565	IL12RB2
ENSG00000142864	1	67823493	67946098	259	26	1672565	SERBP1
ENSG00000116717	1	68100744	68204021	213	22	1672565	GADD45A
ENSG00000172380	1	68117149	68349150	501	35	1672565	GNG12
ENSG00000162595	1	68461645	68567314	184	26	1672565	DIRAS3
ENSG00000116729	1	68514142	68748803	742	79	1672565	WLS
ENSG00000116745	1	68844505	68965642	365	27	1672565	RPE65
ENSG00000024526	1	68889835	69012904	333	27	1672565	DEPDC1
ENSG00000033122	1	69984081	70667628	1618	70	1672565	LRRC7
ENSG00000066557	1	70560488	70721303	232	19	1672565	LRRC40
ENSG00000116754	1	70621365	70768735	187	21	1672565	SRSF11
ENSG00000118454	1	70676271	70870417	283	23	1672565	ANKRD13C
ENSG00000197568	1	70770488	70901022	230	26	1672565	HHLA3
ENSG00000116761	1	70826901	70955534	314	30	1672565	CTH
ENSG00000050628	1	71268036	71563491	721	45	1672565	PTGER3
ENSG00000132485	1	71478974	71596980	286	20	1672565	ZRANB2
ENSG00000172260	1	71811623	72798417	1686	83	1672565	NEGR1
ENSG00000162620	1	74441699	74713871	464	25	1672565	LRRIQ3
ENSG00000254685	1	74613896	74749770	233	22	1672565	FPGT
ENSG00000259030	1	74613919	75059666	765	60	1672565	FPGT-TNNI3K
ENSG00000116783	1	74613947	75060112	765	60	1672565	TNNI3K
ENSG00000162621	1	74885562	75028298	283	30	1672565	LRRC53
ENSG00000178965	1	74983795	75189422	407	40	1672565	C1orf173
ENSG00000116791	1	75121170	75249092	342	31	1672565	CRYZ
ENSG00000162623	1	75148836	75282362	385	26	1672565	TYW3
ENSG00000162624	1	75544119	75677218	248	24	1672565	LHX8
ENSG00000137968	1	75617816	76126801	1161	44	1672565	SLC44A5
ENSG00000117054	1	76140036	76303260	476	23	1672565	ACADM
ENSG00000137955	1	76201879	76310764	327	20	1672565	RABGGTB
ENSG00000057468	1	76212567	76428923	666	24	1672565	MSH4
ENSG00000154007	1	76334558	76448116	340	23	1672565	ASB17
ENSG00000184005	1	76490404	77150286	1947	134	1672565	ST6GALNAC3
ENSG00000117069	1	77283126	77581396	625	48	1672565	ST6GALNAC5
ENSG00000142892	1	77504675	77735115	547	36	1672565	PIGK
ENSG00000154027	1	77697736	78075651	1082	68	1672565	AK5
ENSG00000036549	1	77978101	78199104	379	25	1672565	ZZZ3
ENSG00000077254	1	78111672	78275537	240	25	1672565	USP33
ENSG00000180488	1	78195309	78394106	290	28	1672565	FAM73A
ENSG00000162614	1	78304198	78459580	250	27	1672565	NEXN
ENSG00000162613	1	78359740	78494794	242	26	1672565	FUBP1
ENSG00000162616	1	78394859	78533648	266	22	1672565	DNAJB4
ENSG00000137960	1	78395226	78654133	607	33	1672565	GIPC2
ENSG00000122420	1	78719568	79055434	800	46	1672565	PTGFR
ENSG00000137959	1	79035607	79161830	254	30	1672565	IFI44L
ENSG00000137965	1	79065481	79179763	268	24	1672565	IFI44
ENSG00000162618	1	79305449	79522403	799	35	1672565	ELTD1
ENSG00000117114	1	81721845	82508120	2303	158	1672565	LPHN2
ENSG00000137941	1	84280711	84514833	567	24	1672565	TTLL7
ENSG00000142875	1	84493745	84754181	407	31	1672565	PRKACB
ENSG00000203943	1	84714049	84905640	467	51	1672565	SAMD13
ENSG00000137976	1	84814215	84930701	326	25	1672565	DNASE2B
ENSG00000117133	1	84894942	85013473	380	27	1672565	RPF1
ENSG00000174021	1	84914008	85022248	354	23	1672565	GNG5
ENSG00000117151	1	84965289	85090163	337	20	1672565	CTBS
ENSG00000180869	1	85043913	85150703	251	29	1672565	C1orf180
ENSG00000117155	1	85059390	85206486	326	27	1672565	SSX2IP
ENSG00000171517	1	85227285	85408896	627	67	1672565	LPAR3
ENSG00000153898	1	85341268	85512796	518	35	1672565	MCOLN2
ENSG00000162643	1	85414830	85648821	669	37	1672565	WDR63
ENSG00000055732	1	85433765	85564182	368	22	1672565	MCOLN3
ENSG00000097096	1	85572556	85716729	395	30	1672565	SYDE2
ENSG00000162642	1	85665639	85775355	309	31	1672565	C1orf52
ENSG00000142867	1	85681931	85792773	326	34	1672565	BCL10
ENSG00000153904	1	85734164	86093933	956	68	1672565	DDAH1
ENSG00000142871	1	85996444	86099645	229	40	1672565	CYR61
ENSG00000117174	1	86065106	86224116	377	28	1672565	ZNHIT6
ENSG00000171502	1	86144916	86672626	1616	62	1672565	COL24A1
ENSG00000122417	1	86764344	86912023	468	24	1672565	ODF2L
ENSG00000137975	1	86839769	86972241	479	38	1672565	CLCA2
ENSG00000016490	1	86884051	87015972	438	48	1672565	CLCA1
ENSG00000016602	1	86962761	87096437	319	33	1672565	CLCA4
ENSG00000097033	1	87120259	87263867	299	27	1672565	SH3GLB1
ENSG00000183291	1	87278132	87430107	407	22	1672565	2024-09-15
ENSG00000153936	1	87330331	87652334	741	30	1672565	HS2ST1
ENSG00000267561	1	87408692	87684884	613	36	1672565	RP5-1052I5.2
ENSG00000143013	1	87744151	87864606	328	49	1672565	LMO4
ENSG00000065243	1	89099905	89351938	544	15	1672565	PKN2
ENSG00000137947	1	89268615	89407627	360	16	1672565	GTF2B
ENSG00000137944	1	89351456	89508636	361	22	1672565	CCBL2
ENSG00000213516	1	89395139	89508643	199	23	1672565	RBMXL1
ENSG00000117226	1	89422349	89538577	240	27	1672565	GBP3
ENSG00000117228	1	89468002	89581043	280	16	1672565	GBP1
ENSG00000162645	1	89521815	89666139	310	14	1672565	GBP2
ENSG00000213512	1	89547434	89691723	286	13	1672565	GBP7
ENSG00000162654	1	89596831	89714615	198	17	1672565	GBP4
ENSG00000154451	1	89674633	89788544	179	34	1672565	GBP5
ENSG00000183347	1	89779617	89902020	343	25	1672565	GBP6
ENSG00000197147	1	89940395	90113423	389	25	1672565	LRRC8B
ENSG00000171488	1	90048631	90285462	434	23	1672565	LRRC8C
ENSG00000271949	1	90048699	90448809	640	52	1672565	RP11-302M6.4
ENSG00000171492	1	90236573	90452170	335	44	1672565	LRRC8D
ENSG00000162664	1	90410671	90551090	254	36	1672565	ZNF326
ENSG00000143032	1	91127096	91232794	259	27	1672565	BARHL2
ENSG00000122482	1	91330859	91537829	359	29	1672565	ZNF644
ENSG00000162669	1	91676323	91920426	510	34	1672565	HFM1
ENSG00000097046	1	91916408	92041321	374	29	1672565	CDC7
ENSG00000069702	1	92095902	92421892	967	81	1672565	TGFBR3
ENSG00000137948	1	92364928	92529983	412	22	1672565	BRDT
ENSG00000172031	1	92445539	92579093	258	17	1672565	EPHX4
ENSG00000189195	1	92495862	92663393	248	20	1672565	BTBD8
ENSG00000069712	1	92582542	92700280	158	11	1672565	KIAA1107
ENSG00000203910	1	92633497	92761370	121	10	1672565	C1orf146
ENSG00000174842	1	92661959	92814544	131	10	1672565	GLMN
ENSG00000122484	1	92714522	92917613	170	13	1672565	RPAP2
ENSG00000162676	1	92890319	93002433	135	11	1672565	GFI1
ENSG00000067208	1	92924253	93307961	641	14	1672565	EVI5
ENSG00000122406	1	93247582	93357481	146	10	1672565	RPL5
ENSG00000154511	1	93257724	93477057	300	12	1672565	FAM69A
ENSG00000143033	1	93494792	93654638	306	28	1672565	MTF2
ENSG00000117500	1	93565299	93696285	231	19	1672565	TMED5
ENSG00000122483	1	93595476	93794287	388	16	1672565	CCDC18
ENSG00000117505	1	93761445	93885055	235	17	1672565	DR1
ENSG00000137942	1	93863688	94070218	288	29	1672565	FNBP1L
ENSG00000137936	1	93977347	94362706	1042	40	1672565	BCAR3
ENSG00000067334	1	94283373	94395474	343	24	1672565	DNTTIP2
ENSG00000023909	1	94300761	94424966	372	28	1672565	GCLM
ENSG00000198691	1	94408393	94636688	710	82	1672565	ABCA4
ENSG00000137962	1	94564544	94790624	438	41	1672565	ARHGAP29
ENSG00000117528	1	94833933	95034222	266	26	1672565	ABCD3
ENSG00000117525	1	94944781	95057356	227	26	1672565	F3
ENSG00000143036	1	95235898	95410802	529	56	1672565	SLC44A3
ENSG00000117519	1	95312507	95442834	436	56	1672565	CNN3
ENSG00000172339	1	95389963	95588501	560	30	1672565	ALG14
ENSG00000152078	1	95532894	95713163	504	34	1672565	TMEM56
ENSG00000271092	1	95533479	95762781	619	40	1672565	TMEM56-RWDD3
ENSG00000122481	1	95649711	95762781	267	25	1672565	RWDD3
ENSG00000237435	1	96353457	96538436	450	27	1672565	RP11-147C23.1
ENSG00000117569	1	97137221	97339294	392	27	1672565	PTBP2
ENSG00000188641	1	97493299	98436605	2035	105	1672565	DPYD
ENSG00000162627	1	99077236	99276056	550	27	1672565	SNX7
ENSG00000117598	1	99305806	99520588	725	53	1672565	LPPR5
ENSG00000117600	1	99679509	99825146	376	39	1672565	LPPR4
ENSG00000099260	1	100061499	100210097	407	40	1672565	PALMD
ENSG00000156869	1	100124259	100282187	484	24	1672565	FRRS1
ENSG00000162688	1	100265640	100439579	519	30	1672565	AGL
ENSG00000117620	1	100385345	100542535	421	25	1672565	SLC35A3
ENSG00000156875	1	100453653	100598933	375	18	1672565	HIAT1
ENSG00000156876	1	100499119	100648511	343	19	1672565	SASS6
ENSG00000122435	1	100548706	100666053	240	20	1672565	TRMT13
ENSG00000122477	1	100564409	100693771	259	16	1672565	LRRC39
ENSG00000137992	1	100602475	100765390	314	16	1672565	DBT
ENSG00000137996	1	100681763	100808325	264	24	1672565	RTCA
ENSG00000079335	1	100760584	101035833	446	33	1672565	CDC14A
ENSG00000181656	1	100953693	101057574	221	13	1672565	GPR88
ENSG00000162692	1	101135298	101254601	246	25	1672565	VCAM1
ENSG00000162694	1	101287943	101411554	178	18	1672565	EXTL2
ENSG00000162695	1	101311632	101497309	230	18	1672565	SLC30A7
ENSG00000117543	1	101405179	101541644	174	14	1672565	DPH5
ENSG00000269175	1	101405761	101507653	131	11	1672565	AC093157.1
ENSG00000170989	1	101652444	101757074	307	47	1672565	S1PR1
ENSG00000118733	1	102218130	102512586	932	80	1672565	OLFM3
ENSG00000060718	1	103292023	103624052	1337	40	1672565	COL11A1
ENSG00000185946	1	104018313	104147861	139	23	1672565	RNPC3
ENSG00000240038	1	104046437	104172156	109	20	1672565	AMY2B
ENSG00000243480	1	104109999	104218402	30	12	1672565	AMY2A
ENSG00000187733	1	104243028	104351312	62	11	1672565	AMY1C
ENSG00000198890	1	107549267	107651916	202	11	1672565	PRMT6
ENSG00000162631	1	107632629	108076080	897	83	1672565	NTNG1
ENSG00000134215	1	108063782	108557766	1400	85	1672565	VAV3
ENSG00000085491	1	108626658	108793471	458	33	1672565	SLC25A24
ENSG00000196427	1	108715963	108836689	135	17	1672565	NBPF4
ENSG00000186086	1	108868421	109063624	263	9	1672565	NBPF6
ENSG00000162636	1	109052711	109237522	318	18	1672565	FAM102B
ENSG00000162639	1	109140912	109254148	124	11	1672565	HENMT1
ENSG00000134186	1	109184945	109294425	148	30	1672565	PRPF38B
ENSG00000143107	1	109205279	109335365	242	24	1672565	FNDC7
ENSG00000116266	1	109239296	109402148	447	28	1672565	STXBP3
ENSG00000162641	1	109308520	109556106	688	42	1672565	AKNAD1
ENSG00000121957	1	109367972	109527167	447	31	1672565	GPSM2
ENSG00000121940	1	109422130	109556111	325	28	1672565	CLCC1
ENSG00000085433	1	109462836	109634850	438	43	1672565	WDR47
ENSG00000197780	1	109555108	109668624	295	38	1672565	TAF13
ENSG00000215717	1	109582425	109689556	307	33	1672565	TMEM167B
ENSG00000179902	1	109598573	109706479	310	34	1672565	C1orf194
ENSG00000116299	1	109606301	109799401	514	49	1672565	KIAA1324
ENSG00000031698	1	109706540	109830791	303	32	1672565	SARS
ENSG00000143126	1	109742641	109868372	257	35	1672565	CELSR2
ENSG00000134222	1	109772178	109875808	217	36	1672565	PSRC1
ENSG00000221986	1	109784987	109899663	217	31	1672565	MYBPHL
ENSG00000134243	1	109802192	109990573	292	26	1672565	SORT1
ENSG00000143106	1	109891653	110019062	195	13	1672565	PSMA5
ENSG00000143028	1	109959180	110074759	221	18	1672565	SYPL2
ENSG00000162650	1	109976101	110085426	216	18	1672565	ATXN7L2
ENSG00000174151	1	109986674	110095554	213	19	1672565	CYB561D1
ENSG00000181754	1	109996797	110102360	206	19	1672565	AMIGO1
ENSG00000156097	1	110032494	110141028	181	23	1672565	GPR61
ENSG00000065135	1	110041233	110186975	256	27	1672565	GNAI3
ENSG00000134183	1	110095889	110205679	185	26	1672565	GNAT2
ENSG00000116337	1	110108726	110224673	208	31	1672565	AMPD2
ENSG00000168765	1	110148703	110258118	195	36	1672565	GSTM4
ENSG00000213366	1	110160644	110302171	250	44	1672565	GSTM2
ENSG00000134184	1	110180436	110301661	206	37	1672565	GSTM1
ENSG00000134201	1	110204864	110368050	374	56	1672565	GSTM5
ENSG00000134202	1	110226554	110334384	236	37	1672565	GSTM3
ENSG00000198758	1	110242702	110356649	294	42	1672565	EPS8L3
ENSG00000184371	1	110402864	110523614	260	43	1672565	CSF1
ENSG00000168710	1	110477308	110616357	165	24	1672565	AHCYL1
ENSG00000143093	1	110524199	110667263	197	24	1672565	STRIP1
ENSG00000156150	1	110552616	110663322	167	21	1672565	ALX3
ENSG00000186150	1	110605062	110706569	223	29	1672565	UBL4B
ENSG00000197106	1	110643108	110794824	336	45	1672565	SLC6A17
ENSG00000116396	1	110703965	110875722	472	39	1672565	KCNC4
ENSG00000162775	1	110831128	110939299	264	18	1672565	RBM15
ENSG00000168679	1	110855470	110983704	270	16	1672565	SLC16A4
ENSG00000134248	1	110893871	111000564	223	23	1672565	LAMTOR5
ENSG00000143125	1	110943822	111049976	287	44	1672565	PROK1
ENSG00000143105	1	111009839	111111797	339	44	1672565	KCNA10
ENSG00000177301	1	111086202	111224096	344	41	1672565	KCNA2
ENSG00000177272	1	111164310	111267655	220	31	1672565	KCNA3
ENSG00000143119	1	111365775	111492550	416	23	1672565	CD53
ENSG00000121931	1	111439807	111556701	289	25	1672565	LRIF1
ENSG00000156171	1	111609955	111732838	233	21	1672565	DRAM2
ENSG00000134255	1	111632249	111777724	293	34	1672565	CEPT1
ENSG00000162777	1	111679796	111797157	295	35	1672565	DENND2D
ENSG00000064886	1	111693393	111836062	462	46	1672565	CHI3L2
ENSG00000134216	1	111783484	111913188	654	42	1672565	CHIA
ENSG00000173947	1	111838910	111945635	474	38	1672565	PIFO
ENSG00000085465	1	111906936	112020399	300	23	1672565	OVGP1
ENSG00000116455	1	111932512	112041998	262	24	1672565	WDR77
ENSG00000116459	1	111941486	112055395	282	28	1672565	ATP5F1
ENSG00000143110	1	111966414	112071134	260	30	1672565	C1orf162
ENSG00000121933	1	111975970	112156584	434	65	1672565	ADORA3
ENSG00000116473	1	112034840	112309313	747	62	1672565	RAP1A
ENSG00000197852	1	112173252	112348446	483	37	1672565	FAM212B
ENSG00000064703	1	112247867	112360638	331	28	1672565	DDX20
ENSG00000171385	1	112263284	112581777	872	98	1672565	KCND3
ENSG00000143079	1	112888803	113056078	365	27	1672565	CTTNBP2NL
ENSG00000134245	1	112959163	113122787	308	25	1672565	WNT2B
ENSG00000007341	1	113016140	113213447	313	26	1672565	ST7L
ENSG00000116489	1	113111795	113264241	206	17	1672565	CAPZA1
ENSG00000155363	1	113165763	113293368	186	27	1672565	MOV10
ENSG00000155366	1	113193728	113300056	174	28	1672565	RHOC
ENSG00000271810	1	113195236	113304055	187	29	1672565	RP11-426L16.10
ENSG00000155367	1	113202616	113308099	183	30	1672565	PPM1J
ENSG00000184599	1	113213041	113319857	190	30	1672565	FAM19A3
ENSG00000155380	1	113404469	113549635	186	18	1672565	SLC16A1
ENSG00000198799	1	113565831	113724882	291	15	1672565	LRIG2
ENSG00000081026	1	113883371	114278545	684	32	1672565	MAGI3
ENSG00000116793	1	114189453	114352111	229	20	1672565	PHTF1
ENSG00000081019	1	114254454	114405098	206	19	1672565	RSBN1
ENSG00000134242	1	114306433	114464381	211	23	1672565	PTPN22
ENSG00000188761	1	114370790	114480169	156	24	1672565	BCL2L15
ENSG00000134262	1	114387370	114497823	157	25	1672565	AP4B1
ENSG00000118655	1	114397763	114506708	148	25	1672565	DCLRE1B
ENSG00000163349	1	114421814	114570426	251	38	1672565	HIPK1
ENSG00000116774	1	114472063	114574876	182	29	1672565	OLFML3
ENSG00000134207	1	114581913	114746541	524	69	1672565	SYT6
ENSG00000197323	1	114885399	115103781	454	27	1672565	TRIM33
ENSG00000116752	1	115060178	115174260	206	22	1672565	BCAS2
ENSG00000175984	1	115075469	115263043	320	22	1672565	DENND2C
ENSG00000116748	1	115165719	115288239	197	24	1672565	AMPD1
ENSG00000213281	1	115197090	115309515	175	21	1672565	NRAS
ENSG00000009307	1	115209534	115351297	189	23	1672565	CSDE1
ENSG00000052723	1	115262100	115373306	174	19	1672565	SIKE1
ENSG00000198765	1	115347424	115587991	551	19	1672565	SYCP1
ENSG00000134200	1	115522415	115626941	288	19	1672565	TSHB
ENSG00000134198	1	115540632	115682121	440	32	1672565	TSPAN2
ENSG00000134259	1	115778539	115930857	505	63	1672565	NGF
ENSG00000173218	1	116134574	116290845	512	35	1672565	VANGL1
ENSG00000118729	1	116192628	116361402	582	35	1672565	CASQ2
ENSG00000177551	1	116328998	116436538	355	36	1672565	NHLH2
ENSG00000163393	1	116469119	116662675	386	23	1672565	SLC22A15
ENSG00000173212	1	116604376	116727861	277	31	1672565	MAB21L3
ENSG00000163399	1	116865290	117002883	178	15	1672565	ATP1A1
ENSG00000269279	1	116865890	116976718	145	13	1672565	AL136376.1
ENSG00000116815	1	117007157	117163661	183	33	1672565	CD58
ENSG00000143061	1	117067031	117260375	206	40	1672565	IGSF3
ENSG00000203864	1	117186734	117299225	167	32	1672565	C1orf137
ENSG00000116824	1	117247007	117361850	196	29	1672565	CD2
ENSG00000134247	1	117402679	117582980	397	38	1672565	PTGFRN
ENSG00000134256	1	117494382	117629167	352	39	1672565	CD101
ENSG00000116830	1	117552925	117700075	348	44	1672565	TTF2
ENSG00000134253	1	117603682	117715209	229	32	1672565	TRIM45
ENSG00000134258	1	117636209	117803556	400	41	1672565	VTCN1
ENSG00000198162	1	117860071	118121494	633	25	1672565	MAN1A2
ENSG00000183508	1	118098556	118220994	337	33	1672565	FAM46C
ENSG00000196505	1	118356107	118522253	201	15	1672565	GDAP2
ENSG00000065183	1	118422343	118559165	195	20	1672565	WDR3
ENSG00000155761	1	118446484	118777846	541	18	1672565	SPAG17
ENSG00000092607	1	119375669	119582179	496	35	1672565	TBX15
ENSG00000116874	1	119523839	119733294	527	23	1672565	WARS2
ENSG00000116882	1	119861402	119986753	257	24	1672565	HAO2
ENSG00000203859	1	119907554	120015658	309	21	1672565	HSD3B2
ENSG00000203857	1	119999821	120107681	222	11	1672565	HSD3B1
ENSG00000143067	1	120112045	120240396	317	36	1672565	ZNF697
ENSG00000092621	1	120152421	120336838	418	47	1672565	PHGDH
ENSG00000134240	1	120240619	120361528	282	32	1672565	HMGCS2
ENSG00000134193	1	120286641	120404283	249	25	1672565	REG4
ENSG00000134249	1	120386156	120489118	157	21	1672565	ADAM30
ENSG00000134250	1	120404176	120662240	198	19	1672565	NOTCH2
ENSG00000163386	1	145239772	145420303	8	3	1672565	NBPF10
ENSG00000168509	1	145363095	145467545	10	3	1672565	HFE2
ENSG00000117289	1	145388469	145492635	11	4	1672565	TXNIP
ENSG00000121851	1	145406236	145520388	10	4	1672565	POLR3GL
ENSG00000181039	1	145420508	145525646	7	3	1672565	ANKRD34A
ENSG00000152022	1	145427085	145551669	10	4	1672565	LIX1L
ENSG00000131795	1	145457598	145563536	12	4	1672565	RBM8A
ENSG00000131779	1	145466252	145573730	15	5	1672565	PEX11B
ENSG00000143127	1	145474891	145593868	17	5	1672565	ITGA10
ENSG00000198483	1	145499230	145618526	18	6	1672565	ANKRD35
ENSG00000131788	1	145525233	145636546	16	5	1672565	PIAS3
ENSG00000186364	1	145536115	145639439	17	5	1672565	NUDT17
ENSG00000186141	1	145542605	145661025	14	4	1672565	POLR3C
ENSG00000121848	1	145561036	145746218	29	5	1672565	RNF115
ENSG00000117281	1	145645798	145765614	18	3	1672565	CD160
ENSG00000174827	1	145676918	145814074	15	3	1672565	PDZK1
ENSG00000117262	1	145714411	145877103	4	2	1672565	GPR89A
ENSG00000186275	1	146323546	146517744	101	17	1672565	NBPF12
ENSG00000131791	1	146576685	146694129	405	13	1672565	PRKAB2
ENSG00000131781	1	146596930	146764700	575	19	1672565	FMO5
ENSG00000131778	1	146664291	146817443	556	20	1672565	CHD1L
ENSG00000116128	1	146963182	147148017	392	58	1672565	BCL9
ENSG00000162836	1	147051453	147192618	275	33	1672565	ACP6
ENSG00000143140	1	147178332	147295484	350	27	1672565	GJA5
ENSG00000121634	1	147324946	147431393	200	32	1672565	GJA8
ENSG00000188092	1	147350506	147515753	134	21	1672565	GPR89B
ENSG00000203815	1	149625978	149726609	2	1	1672565	FAM231D
ENSG00000150337	1	149704227	149814074	17	3	1672565	FCGR1A
ENSG00000203814	1	149704245	149833928	26	4	1672565	HIST2H2BF
ENSG00000183598	1	149734826	149835236	24	4	1672565	HIST2H3D
ENSG00000183941	1	149754221	149861339	36	5	1672565	HIST2H4A
ENSG00000203811	1	149761110	149862765	39	5	1672565	HIST2H3C
ENSG00000183558	1	149763505	149864478	40	5	1672565	HIST2H2AA3
ENSG00000203812	1	149772643	149873191	53	4	1672565	HIST2H2AA4
ENSG00000203852	1	149774181	149875836	54	4	1672565	HIST2H3A
ENSG00000182217	1	149775607	149882714	66	5	1672565	HIST2H4B
ENSG00000184678	1	149806010	149908232	91	6	1672565	HIST2H2BE
ENSG00000184260	1	149808525	149908961	91	6	1672565	HIST2H2AC
ENSG00000184270	1	149809019	149909466	91	6	1672565	HIST2H2AB
ENSG00000178096	1	149809440	149922351	101	7	1672565	BOLA1
ENSG00000159164	1	149824870	149939434	103	7	1672565	SV2A
ENSG00000143368	1	149845209	149950236	110	7	1672565	SF3B4
ENSG00000014914	1	149850543	149958791	119	8	1672565	MTMR11
ENSG00000163113	1	149859705	150032625	237	17	1672565	OTUD7B
ENSG00000136631	1	149989369	150167505	253	8	1672565	VPS45
ENSG00000023902	1	150071373	150186916	153	9	1672565	PLEKHO1
ENSG00000143401	1	150140717	150258504	132	11	1672565	ANP32E
ENSG00000118298	1	150179554	150287478	163	14	1672565	CA14
ENSG00000117362	1	150187804	150291980	160	14	1672565	APH1A
ENSG00000118292	1	150190600	150303327	179	15	1672565	C1orf54
ENSG00000159208	1	150204953	150309505	181	14	1672565	C1orf51
ENSG00000187145	1	150216289	150331414	205	15	1672565	MRPS21
ENSG00000117360	1	150243925	150375671	283	12	1672565	PRPF3
ENSG00000163125	1	150285567	150499042	504	13	1672565	RPRD2
ENSG00000143374	1	150409887	150530078	272	18	1672565	TARS2
ENSG00000143369	1	150430538	150536265	214	20	1672565	ECM1
ENSG00000143382	1	150471884	150583413	182	28	1672565	ADAMTSL4
ENSG00000225996	1	150471897	150574367	176	28	1672565	AL356356.1
ENSG00000203804	1	150483480	150583969	157	26	1672565	ADAMTSL4-AS1
ENSG00000143384	1	150497032	150602066	160	25	1672565	MCL1
ENSG00000143420	1	150523327	150652088	196	18	1672565	ENSA
ENSG00000143457	1	150568701	150719630	247	12	1672565	GOLPH3L
ENSG00000143452	1	150620536	150743364	216	9	1672565	HORMAD1
ENSG00000163131	1	150652672	150788433	191	10	1672565	CTSS
ENSG00000143387	1	150718684	150830799	115	10	1672565	CTSK
ENSG00000143437	1	150732181	150899244	187	15	1672565	ARNT
ENSG00000143379	1	150848739	150987213	248	23	1672565	SETDB1
ENSG00000143418	1	150883059	150997479	212	24	1672565	CERS2
ENSG00000143412	1	150904493	151018110	232	33	1672565	ANXA9
ENSG00000143409	1	150919025	151030851	221	35	1672565	FAM63A
ENSG00000143363	1	150930896	151058189	260	32	1672565	PRUNE
ENSG00000163141	1	150959046	151070076	229	36	1672565	BNIPL
ENSG00000143443	1	150970216	151074462	209	32	1672565	C1orf56
ENSG00000197622	1	150973447	151092801	225	32	1672565	CDC42SE1
ENSG00000213190	1	150980234	151090970	212	30	1672565	MLLT11
ENSG00000143458	1	150993054	151148018	264	22	1672565	GABPB2
ENSG00000143434	1	151054161	151169104	159	23	1672565	SEMA6C
ENSG00000163154	1	151079105	151182225	129	22	1672565	TNFAIP8L2
ENSG00000163156	1	151079140	151192773	141	24	1672565	SCNM1
ENSG00000163155	1	151082224	151188424	136	24	1672565	LYSMD1
ENSG00000163157	1	151092462	151198760	128	23	1672565	TMOD4
ENSG00000163159	1	151092463	151217797	155	25	1672565	VPS72
ENSG00000143398	1	151120425	151272012	144	16	1672565	PIP5K1A
ENSG00000159352	1	151177179	151289955	111	11	1672565	PSMD4
ENSG00000232671	1	151202500	151304405	99	11	1672565	RP11-126K1.2
ENSG00000143373	1	151204094	151314656	109	12	1672565	ZNF687
ENSG00000143393	1	151214273	151350191	152	17	1672565	PI4KB
ENSG00000143390	1	151263116	151369833	119	18	1672565	RFX5
ENSG00000143416	1	151286778	151395209	132	21	1672565	SELENBP1
ENSG00000159377	1	151322010	151424420	127	17	1672565	PSMB4
ENSG00000143442	1	151325200	151481941	197	21	1672565	POGZ
ENSG00000143375	1	151432986	151561168	197	29	1672565	CGN
ENSG00000143367	1	151462781	151606059	209	31	1672565	TUFT1
ENSG00000143376	1	151534541	151721567	256	20	1672565	SNX27
ENSG00000159409	1	151624880	151739290	172	16	1672565	CELF3
ENSG00000240510	1	151632909	151752070	186	16	1672565	AL589765.1
ENSG00000178796	1	151632909	151752281	186	16	1672565	RIIAD1
ENSG00000143436	1	151682119	151786040	200	16	1672565	MRPL9
ENSG00000143450	1	151685445	151793808	213	18	1672565	OAZ3
ENSG00000182134	1	151692583	151813892	245	23	1672565	TDRKH
ENSG00000213171	1	151722740	151828630	224	24	1672565	LINGO4
ENSG00000143365	1	151728547	151854348	265	28	1672565	RORC
ENSG00000225556	1	151760295	151863033	212	33	1672565	C2CD4D
ENSG00000196407	1	151769739	151876173	217	31	1672565	THEM5
ENSG00000159445	1	151796060	151932284	315	21	1672565	THEM4
ENSG00000197747	1	151905391	152016866	264	15	1672565	S100A10
ENSG00000163191	1	151954982	152070383	156	21	1672565	S100A11
ENSG00000182898	1	152006620	152111540	75	16	1672565	TCHHL1
ENSG00000159450	1	152028793	152136556	68	17	1672565	TCHH
ENSG00000215853	1	152076071	152181704	130	16	1672565	RPTN
ENSG00000197915	1	152134558	152246669	231	11	1672565	HRNR
ENSG00000143631	1	152224651	152347679	248	10	1672565	FLG
ENSG00000143520	1	152271211	152382482	184	12	1672565	FLG2
ENSG00000143536	1	152331719	152436739	198	13	1672565	CRNN
ENSG00000186207	1	152433320	152534653	254	17	1672565	LCE5A
ENSG00000169509	1	152436978	152538486	261	16	1672565	CRCT1
ENSG00000185966	1	152488130	152589248	173	9	1672565	LCE3E
ENSG00000163202	1	152501857	152602980	214	16	1672565	LCE3D
ENSG00000244057	1	152523138	152623562	232	17	1672565	LCE3C
ENSG00000187238	1	152536287	152636574	208	12	1672565	LCE3B
ENSG00000185962	1	152545310	152645579	204	11	1672565	LCE3A
ENSG00000187223	1	152585872	152687135	283	10	1672565	LCE2D
ENSG00000187180	1	152597771	152699050	302	11	1672565	LCE2C
ENSG00000159455	1	152597771	152709877	316	11	1672565	LCE2B
ENSG00000187173	1	152620840	152721918	231	14	1672565	LCE2A
ENSG00000187170	1	152630636	152731967	229	14	1672565	LCE4A
ENSG00000198854	1	152641998	152742905	237	14	1672565	C1orf68
ENSG00000203786	1	152680506	152784529	242	15	1672565	KPRP
ENSG00000240386	1	152698848	152799445	180	15	1672565	LCE1F
ENSG00000186226	1	152708690	152810902	176	15	1672565	LCE1E
ENSG00000172155	1	152719227	152820657	168	14	1672565	LCE1D
ENSG00000197084	1	152727311	152829107	156	16	1672565	LCE1C
ENSG00000196734	1	152734447	152835585	146	17	1672565	LCE1B
ENSG00000186844	1	152749949	152850573	129	18	1672565	LCE1A
ENSG00000235942	1	152765344	152866459	107	19	1672565	LCE6A
ENSG00000163206	1	152800793	152907523	116	16	1672565	SMCP
ENSG00000163207	1	152831021	152934362	150	15	1672565	IVL
ENSG00000184148	1	152893142	152995050	260	10	1672565	SPRR4
ENSG00000169474	1	152906557	153008289	306	9	1672565	SPRR1A
ENSG00000163209	1	152924223	153026332	342	7	1672565	SPRR3
ENSG00000169469	1	152953678	153055376	377	6	1672565	SPRR1B
ENSG00000163216	1	152962201	153064407	372	8	1672565	SPRR2D
ENSG00000241794	1	152978589	153080013	342	13	1672565	SPRR2A
ENSG00000196805	1	152992700	153163927	436	22	1672565	SPRR2B
ENSG00000203785	1	153015611	153128660	266	19	1672565	SPRR2E
ENSG00000244094	1	153034590	153135991	234	21	1672565	SPRR2F
ENSG00000159516	1	153072058	153173345	183	20	1672565	SPRR2G
ENSG00000203784	1	153125919	153227596	261	22	1672565	LELP1
ENSG00000203783	1	153140060	153241793	256	19	1672565	PRR9
ENSG00000203782	1	153182176	153284598	282	22	1672565	LOR
ENSG00000159527	1	153220338	153333194	339	24	1672565	PGLYRP3
ENSG00000163218	1	153252596	153371316	336	22	1672565	PGLYRP4
ENSG00000163220	1	153280330	153383503	310	19	1672565	S100A9
ENSG00000163221	1	153296184	153398125	274	17	1672565	S100A12
ENSG00000143546	1	153312508	153413664	254	17	1672565	S100A8
ENSG00000184330	1	153339000	153445701	210	16	1672565	S100A7A
ENSG00000197364	1	153359534	153462425	220	20	1672565	S100A7L2
ENSG00000143556	1	153380220	153483177	214	20	1672565	S100A7
ENSG00000197956	1	153457075	153558720	206	17	1672565	S100A6
ENSG00000196420	1	153459623	153564241	202	16	1672565	S100A5
ENSG00000196154	1	153466089	153572612	207	18	1672565	S100A4
ENSG00000188015	1	153469805	153571848	194	17	1672565	S100A3
ENSG00000196754	1	153483584	153590366	206	22	1672565	S100A2
ENSG00000188643	1	153529362	153635621	178	23	1672565	S100A16
ENSG00000189334	1	153536731	153639462	174	21	1672565	S100A14
ENSG00000189171	1	153541263	153656568	193	22	1672565	S100A13
ENSG00000160678	1	153550402	153654513	179	20	1672565	S100A1
ENSG00000160679	1	153556525	153668782	182	20	1672565	CHTOP
ENSG00000143553	1	153581130	153684306	156	13	1672565	SNAPIN
ENSG00000143621	1	153584512	153693524	157	13	1672565	ILF2
ENSG00000169418	1	153601113	153716468	158	16	1672565	NPR1
ENSG00000143624	1	153650543	153796555	187	25	1672565	INTS3
ENSG00000143554	1	153696830	153802633	137	22	1672565	SLC27A3
ENSG00000143614	1	153727201	153945451	289	20	1672565	GATAD2B
ENSG00000198837	1	153851977	153969172	138	13	1672565	DENND4B
ENSG00000160741	1	153870145	153981101	119	13	1672565	CRTC2
ENSG00000143570	1	153881575	153990188	115	12	1672565	SLC39A1
ENSG00000143578	1	153890010	153996839	109	11	1672565	CREB3L4
ENSG00000143543	1	153896745	154000164	107	11	1672565	JTB
ENSG00000143545	1	153904127	154008834	102	12	1672565	RAB13
ENSG00000177954	1	153913235	154014626	102	13	1672565	RPS27
ENSG00000143552	1	153915161	154177592	287	17	1672565	NUP210L
ENSG00000143549	1	154077784	154217124	169	17	1672565	TPM3
ENSG00000163263	1	154121848	154228809	124	14	1672565	C1orf189
ENSG00000143612	1	154129182	154243104	126	14	1672565	C1orf43
ENSG00000143569	1	154142655	154293986	208	26	1672565	UBAP2L
ENSG00000143575	1	154194987	154298351	165	23	1672565	HAX1
ENSG00000143595	1	154243566	154347801	235	22	1672565	AQP10
ENSG00000143515	1	154248029	154373783	305	20	1672565	ATP8B2
ENSG00000160712	1	154327669	154491926	362	27	1672565	IL6R
ENSG00000169291	1	154392248	154524589	299	15	1672565	SHE
ENSG00000163239	1	154424695	154570623	287	18	1672565	TDRD10
ENSG00000160714	1	154471053	154581504	232	20	1672565	UBE2Q1
ENSG00000160716	1	154490257	154602502	230	23	1672565	CHRNB2
ENSG00000160710	1	154504538	154650475	248	28	1672565	ADAR
ENSG00000268141	1	154535067	154635190	156	16	1672565	AL606500.1
ENSG00000143603	1	154619931	154892756	643	91	1672565	KCNN3
ENSG00000163344	1	154847210	154959467	147	13	1672565	PMVK
ENSG00000163346	1	154866552	154978599	135	14	1672565	PBXIP1
ENSG00000163348	1	154879502	154986329	124	16	1672565	PYGO2
ENSG00000160691	1	154884774	154996871	133	19	1672565	SHC1
ENSG00000173207	1	154897129	155001725	118	20	1672565	CKS1B
ENSG00000160688	1	154905814	155015587	130	22	1672565	FLAD1
ENSG00000163352	1	154916062	155016791	104	19	1672565	LENEP
ENSG00000160685	1	154925127	155040998	120	23	1672565	ZBTB7B
ENSG00000163354	1	154940996	155056257	134	27	1672565	DCST2
ENSG00000163357	1	154956300	155073406	152	31	1672565	DCST1
ENSG00000143537	1	154973042	155085252	157	28	1672565	ADAM15
ENSG00000243364	1	154986207	155092029	164	26	1672565	EFNA4
ENSG00000251246	1	154986224	155109283	196	26	1672565	EFNA3
ENSG00000143590	1	154986224	155110014	197	27	1672565	EFNA3
ENSG00000169242	1	155049936	155157333	186	18	1672565	EFNA1
ENSG00000169241	1	155057820	155161329	183	18	1672565	SLC50A1
ENSG00000179085	1	155062367	155163071	177	17	1672565	DPM3
ENSG00000163463	1	155091884	155195951	144	16	1672565	KRTCAP2
ENSG00000273088	1	155091885	155209748	165	18	1672565	RP11-201K10.3
ENSG00000163462	1	155095873	155207447	147	17	1672565	TRIM46
ENSG00000185499	1	155108300	155212707	136	16	1672565	MUC1
ENSG00000169231	1	155115379	155228842	153	18	1672565	THBS3
ENSG00000173171	1	155128490	155233615	139	16	1672565	MTX1
ENSG00000177628	1	155154243	155264490	130	13	1672565	GBA
ENSG00000160767	1	155166996	155275274	126	11	1672565	FAM189B
ENSG00000116521	1	155175770	155282221	121	10	1672565	SCAMP3
ENSG00000176444	1	155182659	155298282	122	10	1672565	CLK2
ENSG00000143630	1	155197374	155309639	118	9	1672565	HCN3
ENSG00000143627	1	155209630	155321225	106	9	1672565	PKLR
ENSG00000160752	1	155228539	155340457	95	10	1672565	FDPS
ENSG00000160753	1	155240687	155350905	85	10	1672565	RUSC1
ENSG00000116539	1	155255059	155582598	208	19	1672565	ASH1L
ENSG00000125459	1	155529979	155768153	190	17	1672565	MSTO1
ENSG00000163374	1	155579237	155708791	92	13	1672565	YY1AP1
ENSG00000132676	1	155607751	155758801	135	13	1672565	DAP3
ENSG00000116580	1	155669508	155879191	226	15	1672565	GON4L
ENSG00000132718	1	155779300	155904990	149	16	1672565	SYT11
ENSG00000143622	1	155817599	155931195	144	13	1672565	RIT1
ENSG00000132680	1	155832834	155954191	138	12	1672565	KIAA0907
ENSG00000173080	1	155861480	155962625	116	10	1672565	RXFP4
ENSG00000116584	1	155866630	156026861	176	16	1672565	ARHGEF2
ENSG00000163479	1	155928839	156040750	111	17	1672565	SSR2
ENSG00000160803	1	155955092	156073585	129	23	1672565	UBQLN4
ENSG00000116586	1	155974543	156078301	113	21	1672565	LAMTOR2
ENSG00000132698	1	155980951	156090295	126	24	1672565	RAB25
ENSG00000254726	1	155991804	156101789	155	21	1672565	MEX3A
ENSG00000160789	1	156002364	156159880	245	29	1672565	LMNA
ENSG00000196189	1	156067157	156197543	252	21	1672565	SEMA4A
ENSG00000160785	1	156113880	156232587	216	25	1672565	SLC25A44
ENSG00000260238	1	156132773	156263123	252	22	1672565	PMF1-BGLAP
ENSG00000160783	1	156132784	156262874	251	27	1672565	PMF1
ENSG00000242252	1	156161753	156263112	195	20	1672565	BGLAP
ENSG00000160781	1	156163206	156267881	199	21	1672565	PAQR6
ENSG00000198952	1	156169015	156302620	263	17	1672565	SMG5
ENSG00000163472	1	156202726	156312976	208	14	1672565	TMEM79
ENSG00000198715	1	156209880	156315463	199	13	1672565	C1orf85
ENSG00000189030	1	156218415	156319428	192	12	1672565	VHLL
ENSG00000163468	1	156228759	156387664	282	28	1672565	CCT3
ENSG00000163467	1	156257105	156366786	192	22	1672565	TSACC
ENSG00000132677	1	156289003	156405011	178	32	1672565	RHBG
ENSG00000125462	1	156324042	156450493	174	39	1672565	C1orf61
ENSG00000116604	1	156383519	156520620	209	30	1672565	MEF2D
ENSG00000183856	1	156445197	156592396	309	22	1672565	IQGAP3
ENSG00000187862	1	156499519	156606562	219	15	1672565	TTC24
ENSG00000163382	1	156511554	156614091	211	15	1672565	APOA1BP
ENSG00000160818	1	156514279	156621288	212	15	1672565	GPATCH4
ENSG00000132702	1	156539086	156645517	217	19	1672565	HAPLN2
ENSG00000132692	1	156561182	156679324	240	31	1672565	BCAN
ENSG00000132688	1	156588555	156697189	186	38	1672565	NES
ENSG00000143320	1	156619398	156725608	188	37	1672565	CRABP2
ENSG00000143319	1	156641683	156748591	196	36	1672565	ISG20L2
ENSG00000143303	1	156648234	156756752	215	37	1672565	RRNAD1
ENSG00000143314	1	156657095	156761382	204	32	1672565	MRPL24
ENSG00000143321	1	156661899	156786717	244	31	1672565	HDGF
ENSG00000143294	1	156670402	156820607	313	27	1672565	PRCC
ENSG00000027869	1	156726035	156836654	240	28	1672565	SH2D2A
ENSG00000198400	1	156735432	156901642	375	44	1672565	NTRK1
ENSG00000027644	1	156759855	156878810	263	34	1672565	INSRR
ENSG00000187800	1	156813490	156936226	230	27	1672565	PEAR1
ENSG00000160838	1	156840442	156952886	237	21	1672565	LRRC71
ENSG00000132694	1	156854632	157065162	598	25	1672565	ARHGEF11
ENSG00000253831	1	157011836	157119600	375	29	1672565	ETV3L
ENSG00000117036	1	157040983	157158266	356	28	1672565	ETV3
ENSG00000143297	1	157433167	157572310	348	37	1672565	FCRL5
ENSG00000163518	1	157493539	157617870	391	16	1672565	FCRL4
ENSG00000160856	1	157594111	157720647	351	19	1672565	FCRL3
ENSG00000132704	1	157665523	157796922	250	22	1672565	FCRL2
ENSG00000163534	1	157714193	157839895	231	27	1672565	FCRL1
ENSG00000073754	1	157750704	157918046	413	35	1672565	CD5L
ENSG00000183853	1	157913063	158120052	556	73	1672565	KIRREL
ENSG00000158473	1	158099737	158204686	384	18	1672565	CD1D
ENSG00000158477	1	158173927	158278059	304	18	1672565	CD1A
ENSG00000158481	1	158209576	158313420	164	22	1672565	CD1C
ENSG00000158485	1	158247741	158351321	230	21	1672565	CD1B
ENSG00000158488	1	158273254	158377343	331	20	1672565	CD1E
ENSG00000186306	1	158318312	158419256	409	28	1672565	OR10T2
ENSG00000180708	1	158339718	158440656	409	30	1672565	OR10K2
ENSG00000173285	1	158385272	158486344	358	15	1672565	OR10K1
ENSG00000198965	1	158399668	158500675	395	15	1672565	OR10R2
ENSG00000197532	1	158466918	158567895	366	15	1672565	OR6Y1
ENSG00000186440	1	158482441	158583394	359	16	1672565	OR6P1
ENSG00000186400	1	158498709	158599689	336	17	1672565	OR10X1
ENSG00000198967	1	158526229	158627170	257	16	1672565	OR10Z1
ENSG00000163554	1	158530496	158706488	414	28	1672565	SPTA1
ENSG00000196171	1	158619369	158720486	244	17	1672565	OR6K2
ENSG00000203757	1	158636958	158737953	286	16	1672565	OR6K3
ENSG00000180433	1	158674510	158775681	332	36	1672565	OR6K6
ENSG00000197403	1	158685466	158786492	340	39	1672565	OR6N1
ENSG00000188340	1	158696472	158797425	349	43	1672565	OR6N2
ENSG00000163563	1	158751107	158869296	404	29	1672565	MNDA
ENSG00000163564	1	158850586	158996844	502	37	1672565	PYHIN1
ENSG00000163565	1	158919758	159074945	457	29	1672565	IFI16
ENSG00000163568	1	158982274	159166886	401	34	1672565	AIM2
ENSG00000162706	1	159091399	159223103	240	38	1672565	CADM3
ENSG00000213088	1	159123097	159226290	214	30	1672565	DARC
ENSG00000179639	1	159209504	159328014	306	22	1672565	FCER1A
ENSG00000196266	1	159233460	159334449	247	26	1672565	OR10J3
ENSG00000196184	1	159359512	159460600	258	21	1672565	OR10J1
ENSG00000184155	1	159454793	159555842	280	21	1672565	OR10J5
ENSG00000132703	1	159507615	159608655	283	26	1672565	APCS
ENSG00000132693	1	159632079	159734379	195	25	1672565	CRP
ENSG00000158716	1	159700722	159802333	271	40	1672565	DUSP23
ENSG00000181036	1	159720301	159836041	320	43	1672565	FCRL6
ENSG00000158714	1	159746540	159857039	316	41	1672565	SLAMF8
ENSG00000188004	1	159754264	159875137	335	37	1672565	C1orf204
ENSG00000243284	1	159774106	159882447	295	33	1672565	VSIG8
ENSG00000256029	1	159777690	159892843	303	35	1672565	RP11-190A12.7
ENSG00000213085	1	159792154	159919953	323	41	1672565	CCDC19
ENSG00000269620	1	159829884	159930159	262	38	1672565	AL590560.1
ENSG00000158710	1	159837897	159945522	279	43	1672565	TAGLN2
ENSG00000085552	1	159846829	159965386	308	53	1672565	IGSF9
ENSG00000162723	1	159871282	159974044	274	48	1672565	SLAMF9
ENSG00000143315	1	159947462	160051783	276	31	1672565	PIGM
ENSG00000177807	1	159957257	160090038	320	33	1672565	KCNJ10
ENSG00000162728	1	160001360	160110353	223	27	1672565	KCNJ9
ENSG00000162729	1	160011130	160118733	243	30	1672565	IGSF8
ENSG00000018625	1	160035549	160163381	356	48	1672565	ATP1A2
ENSG00000132681	1	160071360	160206767	330	56	1672565	ATP1A4
ENSG00000143318	1	160110285	160221676	252	48	1672565	CASQ1
ENSG00000162734	1	160125127	160235166	209	41	1672565	PEA15
ENSG00000132716	1	160135505	160304920	266	31	1672565	DCAF8
ENSG00000258465	1	160137254	160304920	260	34	1672565	DCAF8
ENSG00000162735	1	160196602	160306138	134	13	1672565	PEX19
ENSG00000122218	1	160209063	160363190	255	18	1672565	COPA
ENSG00000162736	1	160263062	160378742	216	26	1672565	NCSTN
ENSG00000171786	1	160286857	160392638	214	25	1672565	NHLH1
ENSG00000162738	1	160320376	160448468	240	29	1672565	VANGL2
ENSG00000162739	1	160404820	160543052	321	33	1672565	SLAMF6
ENSG00000066294	1	160460885	160599306	457	26	1672565	CD84
ENSG00000117090	1	160527890	160667085	442	52	1672565	SLAMF1
ENSG00000117091	1	160598536	160731641	355	63	1672565	CD48
ENSG00000026751	1	160659037	160774611	278	39	1672565	SLAMF7
ENSG00000122224	1	160715864	160848051	310	20	1672565	LY9
ENSG00000122223	1	160749950	160882692	320	16	1672565	CD244
ENSG00000179914	1	160796329	160904960	284	13	1672565	ITLN1
ENSG00000158764	1	160864815	160974589	305	21	1672565	ITLN2
ENSG00000158769	1	160915001	161041138	318	17	1672565	F11R
ENSG00000270149	1	160917747	161058752	349	23	1672565	RP11-544M22.13
ENSG00000215845	1	160957421	161058780	198	22	1672565	TSTD1
ENSG00000158773	1	160959041	161065767	203	24	1672565	USF1
ENSG00000186517	1	160966736	161089760	227	31	1672565	ARHGAP30
ENSG00000268154	1	160985655	161085943	182	31	1672565	AL591806.1
ENSG00000143217	1	160990785	161109389	194	34	1672565	PVRL4
ENSG00000162755	1	161018151	161120136	148	27	1672565	KLHDC9
ENSG00000143256	1	161020346	161137901	165	28	1672565	PFDN2
ENSG00000158793	1	161037876	161145235	148	22	1672565	NIT1
ENSG00000158796	1	161040764	161152478	151	22	1672565	DEDD
ENSG00000143222	1	161072566	161178646	135	18	1672565	UFC1
ENSG00000143258	1	161079240	161185513	129	19	1672565	USP21
ENSG00000143224	1	161086200	161197803	145	23	1672565	PPOX
ENSG00000158850	1	161091100	161197287	142	22	1672565	B4GALT3
ENSG00000158859	1	161104098	161218846	185	29	1672565	ADAMTS4
ENSG00000158864	1	161116894	161234185	216	32	1672565	NDUFS2
ENSG00000158869	1	161135024	161240489	223	35	1672565	FCER1G
ENSG00000268387	1	161140160	161242296	221	34	1672565	AL590714.1
ENSG00000158874	1	161142082	161243421	221	34	1672565	APOA2
ENSG00000158882	1	161145793	161250408	232	36	1672565	TOMM40L
ENSG00000143257	1	161149456	161258092	256	31	1672565	NR1I3
ENSG00000248485	1	161178517	161305240	354	39	1672565	PCP4L1
ENSG00000158887	1	161224525	161329762	352	29	1672565	MPZ
ENSG00000143252	1	161234047	161382984	509	23	1672565	SDHC
ENSG00000188931	1	161284521	161387664	385	9	1672565	C1orf192
ENSG00000143226	1	161425220	161543803	177	27	1672565	FCGR2A
ENSG00000173110	1	161444036	161546681	167	26	1672565	HSPA6
ENSG00000203747	1	161461549	161650917	237	34	1672565	FCGR3A
ENSG00000072694	1	161501101	161698444	323	38	1672565	FCGR2B
ENSG00000162747	1	161542986	161651753	102	13	1672565	FCGR3B
ENSG00000132185	1	161626762	161734142	323	37	1672565	FCRLA
ENSG00000162746	1	161641353	161747933	363	41	1672565	FCRLB
ENSG00000081721	1	161669548	161777028	346	36	1672565	DUSP12
ENSG00000118217	1	161686084	161983860	845	38	1672565	ATF6
ENSG00000162745	1	161902982	162043644	406	53	1672565	OLFML2B
ENSG00000198929	1	161989564	162403321	1282	68	1672565	NOS1AP
ENSG00000254706	1	162285197	162401905	356	53	1672565	RP11-565P22.6
ENSG00000239887	1	162286698	162406600	358	52	1672565	C1orf226
ENSG00000171722	1	162292993	162396660	334	48	1672565	C1orf111
ENSG00000198574	1	162315056	162431928	330	39	1672565	SH2D1B
ENSG00000152332	1	162417041	162549419	270	22	1672565	UHMK1
ENSG00000117143	1	162481323	162619627	232	31	1672565	UAP1
ENSG00000162733	1	162551163	162807190	538	39	1672565	DDR2
ENSG00000132196	1	162710492	162832607	262	29	1672565	HSD17B7
ENSG00000185860	1	162744248	162888605	431	46	1672565	C1orf110
ENSG00000117152	1	162988565	163096592	328	29	1672565	RGS4
ENSG00000143248	1	163030911	163341577	1057	53	1672565	RGS5
ENSG00000143228	1	163186366	163375554	718	39	1672565	NUF2
ENSG00000185630	1	164474821	164918533	1125	114	1672565	PBX1
ENSG00000162761	1	165121104	165375952	786	77	1672565	LMX1A
ENSG00000143171	1	165320159	165464433	483	55	1672565	RXRG
ENSG00000162763	1	165463244	165583198	443	28	1672565	LRRC52
ENSG00000143198	1	165550098	165681033	481	42	1672565	MGST3
ENSG00000143149	1	165581453	165718100	462	42	1672565	ALDH9A1
ENSG00000143183	1	165646032	165846992	375	43	1672565	TMCO1
ENSG00000143179	1	165746768	165930855	299	37	1672565	UCK2
ENSG00000188859	1	165976674	166186206	453	38	1672565	FAM78B
ENSG00000267884	1	165976679	166078709	260	28	1672565	AL626787.1
ENSG00000143157	1	166758681	166875581	254	21	1672565	POGK
ENSG00000152382	1	166775747	166895564	251	27	1672565	TADA1
ENSG00000143195	1	166832443	166994719	312	26	1672565	ILDR2
ENSG00000143194	1	166908346	167041451	313	29	1672565	MAEL
ENSG00000143167	1	166972073	167109868	390	40	1672565	GPA33
ENSG00000198842	1	167013282	167148402	484	57	1672565	DUSP27
ENSG00000143190	1	167140066	167446582	605	40	1672565	POU2F1
ENSG00000198821	1	167349877	167537847	590	94	1672565	CD247
ENSG00000143162	1	167448914	167573004	495	74	1672565	CREG1
ENSG00000198771	1	167549330	167725486	525	59	1672565	RCSD1
ENSG00000197965	1	167640429	167811156	478	50	1672565	MPZL1
ENSG00000143199	1	167728625	167933453	519	55	1672565	ADCY10
ENSG00000143158	1	167835967	167956278	223	16	1672565	MPC2
ENSG00000143164	1	167855021	168095081	311	14	1672565	DCAF6
ENSG00000143147	1	168003997	168156821	247	24	1672565	GPR161
ENSG00000143155	1	168098171	168219950	273	23	1672565	TIPRL
ENSG00000213064	1	168145176	168272263	280	24	1672565	SFT2D2
ENSG00000143178	1	168200278	168333664	316	36	1672565	TBX19
ENSG00000143185	1	168460003	168563235	265	22	1672565	XCL2
ENSG00000143184	1	168495711	168601315	288	29	1672565	XCL1
ENSG00000143196	1	168614697	168748502	490	46	1672565	DPT
ENSG00000143153	1	169024935	169151960	443	38	1672565	ATP1B1
ENSG00000143156	1	169051769	169387205	1020	30	1672565	NME7
ENSG00000117475	1	169287208	169415778	356	21	1672565	BLZF1
ENSG00000117477	1	169314108	169479907	434	31	1672565	CCDC181
ENSG00000117479	1	169383147	169505241	339	32	1672565	SLC19A2
ENSG00000198734	1	169433404	169605826	552	44	1672565	F5
ENSG00000174175	1	169508087	169649431	514	35	1672565	SELP
ENSG00000000460	1	169581245	169873221	1070	26	1672565	C1orf112
ENSG00000188404	1	169609808	169730839	539	25	1672565	SELL
ENSG00000007908	1	169641781	169783846	606	24	1672565	SELE
ENSG00000171806	1	169711670	169814107	411	18	1672565	METTL18
ENSG00000000457	1	169768772	169913408	423	16	1672565	SCYL3
ENSG00000075945	1	169840467	170104349	740	18	1672565	KIFAP3
ENSG00000203740	1	170065142	170186931	402	28	1672565	METTL11B
ENSG00000120370	1	170451270	170572587	172	24	1672565	GORAB
ENSG00000116132	1	170581869	170758560	366	34	1672565	PRRX1
ENSG00000117501	1	170854612	171083906	741	48	1672565	MROH9
ENSG00000007933	1	171010018	171136959	402	27	1672565	FMO3
ENSG00000117507	1	171056879	171180707	487	32	1672565	FMO6P
ENSG00000094963	1	171104347	171231822	517	26	1672565	FMO2
ENSG00000010932	1	171167638	171305117	352	29	1672565	FMO1
ENSG00000076258	1	171233347	171361223	206	18	1672565	FMO4
ENSG00000117523	1	171404651	171612650	523	28	1672565	PRRC2C
ENSG00000034971	1	171554557	171671823	343	29	1672565	MYOC
ENSG00000117533	1	171619300	171761387	446	25	1672565	VAMP4
ENSG00000010165	1	171700788	171833163	430	20	1672565	METTL13
ENSG00000197959	1	171760621	172437606	1481	71	1672565	DNM3
ENSG00000135845	1	172289329	172463230	415	31	1672565	PIGC
ENSG00000180999	1	172339828	172487971	377	32	1672565	C1orf105
ENSG00000094975	1	172451489	172630971	327	24	1672565	SUCO
ENSG00000117560	1	172578154	172686014	214	27	1672565	FASLG
ENSG00000120337	1	172959100	173070103	199	21	1672565	TNFSF18
ENSG00000117586	1	173102873	173226452	267	28	1672565	TNFSF4
ENSG00000117592	1	173396405	173507946	215	15	1672565	PRDX6
ENSG00000162753	1	173419603	173622233	331	16	1672565	SLC9C2
ENSG00000183831	1	173528700	173689001	182	20	1672565	ANKRD45
ENSG00000076321	1	173634080	173805840	164	16	1672565	KLHL20
ENSG00000120334	1	173718688	173843858	136	15	1672565	CENPL
ENSG00000117593	1	173743641	173877684	181	17	1672565	DARS2
ENSG00000185278	1	173787220	173922687	215	18	1672565	ZBTB37
ENSG00000117601	1	173822947	173936516	206	17	1672565	SERPINC1
ENSG00000135870	1	173850352	174041435	312	12	1672565	RC3H1
ENSG00000152061	1	174078548	175014445	1624	24	1672565	RABGAP1L
ENSG00000203737	1	174367212	174468683	181	14	1672565	GPR52
ENSG00000116161	1	174918300	175030851	172	25	1672565	CACYBP
ENSG00000120333	1	174929925	175042561	179	26	1672565	MRPS14
ENSG00000120332	1	174986994	175167202	498	40	1672565	TNN
ENSG00000235750	1	175076123	175212135	397	41	1672565	KIAA0040
ENSG00000116147	1	175234330	175762906	1467	127	1672565	TNR
ENSG00000143207	1	175863967	176226629	684	32	1672565	RFWD2
ENSG00000116183	1	176382307	176864735	931	49	1672565	PAPPA2
ENSG00000152092	1	176776438	177184109	883	59	1672565	ASTN1
ENSG00000198797	1	177090633	177301558	392	35	1672565	BRINP2
ENSG00000120341	1	177843091	178003438	527	44	1672565	SEC16B
ENSG00000075391	1	178012864	178498644	736	30	1672565	RASAL2
ENSG00000240021	1	178432212	178567734	309	22	1672565	TEX35
ENSG00000213057	1	178461887	178568024	264	14	1672565	C1orf220
ENSG00000184909	1	178461950	178567579	263	14	1672565	C1ORF220
ENSG00000116191	1	178644300	178939238	633	34	1672565	RALGPS2
ENSG00000116194	1	178768840	178890187	196	20	1672565	ANGPTL1
ENSG00000116199	1	178944939	179095697	386	31	1672565	FAM20B
ENSG00000186283	1	179000512	179117158	285	22	1672565	TOR3A
ENSG00000143322	1	179018462	179248819	524	24	1672565	ABL2
ENSG00000057252	1	179212925	179377815	598	28	1672565	SOAT1
ENSG00000162779	1	179284855	179573870	1241	25	1672565	AXDND1
ENSG00000269064	1	179393716	179507805	606	18	1672565	AL160286.1
ENSG00000116218	1	179469674	179595087	398	24	1672565	NPHS2
ENSG00000162782	1	179510748	179710407	578	26	1672565	TDRD5
ENSG00000143340	1	179662298	179835333	505	39	1672565	FAM163A
ENSG00000169905	1	179759102	179896938	297	21	1672565	TOR1AIP2
ENSG00000258664	1	179783916	179884311	225	22	1672565	IFRG15
ENSG00000143337	1	179801177	179944135	328	21	1672565	TOR1AIP1
ENSG00000135837	1	179873873	180134015	615	24	1672565	CEP350
ENSG00000116260	1	180073969	180223165	460	41	1672565	QSOX1
ENSG00000121454	1	180149421	180299380	424	50	1672565	LHX4
ENSG00000135847	1	180194515	180522089	837	37	1672565	ACBD6
ENSG00000143324	1	180551140	180909387	641	38	1672565	XPR1
ENSG00000135835	1	180832290	180970750	264	40	1672565	KIAA1614
ENSG00000234237	1	180891695	180999868	210	32	1672565	AL162431.1
ENSG00000135823	1	180891861	181042047	338	39	1672565	STX6
ENSG00000153029	1	180953067	181081074	283	29	1672565	MR1
ENSG00000162783	1	181007638	181109977	303	24	1672565	IER5
ENSG00000198216	1	181332238	181827219	1225	94	1672565	CACNA1E
ENSG00000179930	1	181973705	182080847	290	22	1672565	ZNF648
ENSG00000135821	1	182300839	182411341	330	24	1672565	GLUL
ENSG00000203730	1	182317252	182419751	279	21	1672565	TEDDM1
ENSG00000121446	1	182369256	182579734	518	36	1672565	RGSL1
ENSG00000135828	1	182492769	182608391	284	29	1672565	RNASEL
ENSG00000143333	1	182517758	182623543	234	38	1672565	RGS16
ENSG00000135824	1	182565239	182703711	303	37	1672565	RGS8
ENSG00000135838	1	182708428	182849519	219	28	1672565	NPL
ENSG00000135829	1	182758504	182906886	190	15	1672565	DHX9
ENSG00000157060	1	182819000	182972660	274	23	1672565	SHCBP1L
ENSG00000135862	1	182942595	183164727	762	21	1672565	LAMC1
ENSG00000058085	1	183105373	183264035	416	28	1672565	LAMC2
ENSG00000157064	1	183167372	183437737	587	28	1672565	NMNAT2
ENSG00000116698	1	183391351	183617381	467	35	1672565	SMG7
ENSG00000116701	1	183474698	183610011	315	24	1672565	NCF2
ENSG00000162704	1	183542401	183654892	411	16	1672565	ARPC5
ENSG00000143344	1	183555220	183947665	1083	50	1672565	RGL1
ENSG00000173627	1	183565541	183672451	396	8	1672565	APOBEC4
ENSG00000198756	1	183848796	184056863	465	44	1672565	COLGALT2
ENSG00000198860	1	183970811	184093346	229	32	1672565	TSEN15
ENSG00000116667	1	184306192	184648154	694	43	1672565	C1orf21
ENSG00000116406	1	184609365	184774047	294	22	1672565	EDEM3
ENSG00000135842	1	184709858	184993682	505	34	1672565	FAM129A
ENSG00000121481	1	184964496	185121740	161	15	1672565	RNF2
ENSG00000121486	1	185037220	185176204	152	12	1672565	TRMT1L
ENSG00000116668	1	185076212	185310897	241	19	1672565	SWT1
ENSG00000116679	1	185215520	185336461	134	14	1672565	IVNS1ABP
ENSG00000143341	1	185653683	186210085	809	42	1672565	HMCN1
ENSG00000116690	1	186215405	186333694	226	23	1672565	PRG4
ENSG00000047410	1	186230784	186394825	297	20	1672565	TPR
ENSG00000157181	1	186294890	186440510	243	25	1672565	C1orf27
ENSG00000268662	1	186314123	186415908	176	21	1672565	AL596220.1
ENSG00000262180	1	186319704	186420587	164	22	1672565	OCLM
ENSG00000116703	1	186362698	186480254	183	16	1672565	PDC
ENSG00000073756	1	186590923	186699559	271	16	1672565	PTGS2
ENSG00000116711	1	186748085	187008113	676	62	1672565	PLA2G4A
ENSG00000162670	1	190016792	190496759	898	38	1672565	BRINP3
ENSG00000150681	1	192077587	192204945	270	21	1672565	RGS18
ENSG00000253148	1	192236122	192386415	308	24	1672565	RGS21
ENSG00000090104	1	192494857	192599161	292	31	1672565	RGS1
ENSG00000127074	1	192555275	192679390	339	28	1672565	RGS13
ENSG00000116741	1	192728169	192831403	251	26	1672565	RGS2
ENSG00000116750	1	192931380	193079237	170	24	1672565	UCHL5
ENSG00000116747	1	192978552	193110907	131	14	1672565	TROVE2
ENSG00000023572	1	193015598	193125244	131	12	1672565	GLRX2
ENSG00000134371	1	193041147	193273031	295	15	1672565	CDC73
ENSG00000162630	1	193098175	193205784	141	13	1672565	B3GALT2
ENSG00000162687	1	196144909	196628355	767	23	1672565	KCNT2
ENSG00000000971	1	196571008	196766634	255	16	1672565	CFH
ENSG00000116785	1	196693925	196813203	54	9	1672565	CFHR3
ENSG00000244414	1	196738887	196851319	98	10	1672565	CFHR1
ENSG00000080910	1	196738898	196978356	314	18	1672565	CFHR2
ENSG00000134365	1	196769371	196938102	238	19	1672565	CFHR4
ENSG00000134389	1	196896667	197028804	227	23	1672565	CFHR5
ENSG00000143278	1	196958321	197086397	211	16	1672565	F13B
ENSG00000066279	1	197003258	197165824	277	12	1672565	ASPM
ENSG00000177888	1	197072810	197219672	217	20	1672565	ZBTB41
ENSG00000134376	1	197120592	197497585	476	44	1672565	CRB1
ENSG00000213047	1	197423878	197794826	462	18	1672565	DENND1B
ENSG00000203724	1	197821777	197926497	187	33	1672565	C1orf53
ENSG00000143355	1	197831037	197954608	219	39	1672565	LHX9
ENSG00000151414	1	198076093	198341550	694	27	1672565	NEK7
ENSG00000151418	1	198442352	198560075	352	27	1672565	ATP6V1G3
ENSG00000081237	1	198557801	198776545	589	34	1672565	PTPRC
ENSG00000116833	1	199946730	200196552	751	76	1672565	NR5A2
ENSG00000162702	1	200324068	200429184	190	15	1672565	ZNF281
ENSG00000118193	1	200470628	200639862	473	32	1672565	KIF14
ENSG00000118197	1	200543024	200689097	455	31	1672565	DDX59
ENSG00000118200	1	200658686	200879832	554	30	1672565	CAMSAP2
ENSG00000170128	1	200792083	200893306	248	37	1672565	GPR25
ENSG00000163362	1	200810176	200934863	315	39	1672565	C1orf106
ENSG00000116852	1	200888520	201042828	364	29	1672565	KIF21B
ENSG00000081248	1	200958642	201131694	516	60	1672565	CACNA1S
ENSG00000232237	1	201033081	201146312	382	56	1672565	ASCL5
ENSG00000116857	1	201053900	201190702	441	63	1672565	TMEM9
ENSG00000163395	1	201109953	201248080	446	49	1672565	IGFN1
ENSG00000081277	1	201202580	201352121	514	33	1672565	PKP1
ENSG00000118194	1	201278136	201396890	373	34	1672565	TNNT2
ENSG00000159166	1	201292372	201418736	385	46	1672565	LAD1
ENSG00000159173	1	201323625	201448994	388	57	1672565	TNNI1
ENSG00000174307	1	201384620	201488365	353	39	1672565	PHLDA3
ENSG00000159176	1	201402658	201528584	474	48	1672565	CSRP1
ENSG00000269690	1	201542013	201642738	262	36	1672565	AC096677.1
ENSG00000134369	1	201542411	201846102	643	70	1672565	NAV1
ENSG00000198700	1	201748269	201903422	264	22	1672565	IPO9
ENSG00000198892	1	201807808	201911434	188	24	1672565	SHISA4
ENSG00000163431	1	201815580	201965715	349	41	1672565	LMOD1
ENSG00000134375	1	201874619	201989789	333	39	1672565	TIMM17A
ENSG00000176393	1	201901500	202025275	324	32	1672565	RNPEP
ENSG00000163435	1	201927073	202036316	316	34	1672565	ELF3
ENSG00000170075	1	202041986	202152720	352	53	1672565	GPR37L1
ENSG00000143862	1	202052532	202163869	342	50	1672565	ARL8A
ENSG00000143851	1	202066141	202180716	357	54	1672565	PTPN7
ENSG00000133067	1	202113029	202338909	509	43	1672565	LGR6
ENSG00000077152	1	202250785	202361108	156	14	1672565	UBE2T
ENSG00000077157	1	202267827	202611834	431	23	1672565	PPP1R12B
ENSG00000143858	1	202509724	202729545	411	47	1672565	SYT2
ENSG00000117139	1	202646526	202828598	389	26	1672565	KDM5B
ENSG00000184774	1	202739394	202846353	247	29	1672565	RP11-480I12.4
ENSG00000183155	1	202798085	202908263	222	23	1672565	RABIF
ENSG00000117153	1	202810228	202947764	279	22	1672565	KLHL12
ENSG00000159346	1	202859951	202977700	234	28	1672565	ADIPOR1
ENSG00000159348	1	202880997	202986408	216	30	1672565	CYB5R1
ENSG00000163444	1	202926514	203043976	268	36	1672565	TMEM183A
ENSG00000143847	1	202945626	203097868	322	43	1672565	PPFIA4
ENSG00000122180	1	203002260	203105164	229	32	1672565	MYOG
ENSG00000163485	1	203009782	203186533	453	62	1672565	ADORA1
ENSG00000133055	1	203086939	203194941	305	39	1672565	MYBPH
ENSG00000133048	1	203098059	203205877	326	45	1672565	CHI3L1
ENSG00000133063	1	203131955	203292769	436	57	1672565	CHIT1
ENSG00000159388	1	203224619	203328730	238	35	1672565	BTG2
ENSG00000122176	1	203259756	203370617	274	51	1672565	FMOD
ENSG00000188783	1	203394956	203510480	301	30	1672565	PRELP
ENSG00000188770	1	203413271	203527992	289	33	1672565	OPTC
ENSG00000058668	1	203545689	203763209	445	54	1672565	ATP2B4
ENSG00000122188	1	203684304	203795361	258	24	1672565	LAX1
ENSG00000058673	1	203714782	203873252	383	20	1672565	ZC3H11A
ENSG00000257315	1	203715437	203819686	261	18	1672565	ZBED6
ENSG00000182004	1	203780731	203889678	241	16	1672565	SNRPE
ENSG00000143842	1	203992243	204146863	388	62	1672565	SOX13
ENSG00000143845	1	204050190	204171307	307	54	1672565	ETNK2
ENSG00000143839	1	204073944	204185465	283	44	1672565	REN
ENSG00000170498	1	204109469	204215614	289	32	1672565	KISS1
ENSG00000174567	1	204117288	204233220	295	31	1672565	GOLT1A
ENSG00000143850	1	204137979	204396793	688	56	1672565	PLEKHA6
ENSG00000158615	1	204322515	204430919	232	37	1672565	PPP1R15B
ENSG00000133056	1	204341756	204513852	324	34	1672565	PIK3C2B
ENSG00000198625	1	204435511	204592871	281	14	1672565	MDM4
ENSG00000170382	1	204536298	204704861	410	41	1672565	LRRN2
ENSG00000163531	1	204747779	205041950	757	63	1672565	NFASC
ENSG00000184144	1	204962325	205097627	397	45	1672565	CNTN2
ENSG00000174529	1	205002258	205103645	270	21	1672565	TMEM81
ENSG00000117222	1	205005270	205141143	345	24	1672565	RBBP5
ENSG00000133059	1	205061632	205230727	374	18	1672565	DSTYK
ENSG00000133069	1	205147304	205292471	328	21	1672565	TMCC2
ENSG00000163545	1	205221187	205340883	349	27	1672565	NUAK2
ENSG00000162873	1	205255220	205376218	343	30	1672565	KLHDC8A
ENSG00000186007	1	205300506	205475082	508	67	1672565	LEMD1
ENSG00000117266	1	205423723	205551921	409	63	1672565	CDK18
ENSG00000174514	1	205488013	205622046	401	44	1672565	MFSD4
ENSG00000158711	1	205527071	205651090	334	39	1672565	ELK4
ENSG00000158715	1	205576979	205699587	292	38	1672565	SLC45A3
ENSG00000069275	1	205631947	205769404	329	30	1672565	NUCKS1
ENSG00000268313	1	205632497	205734153	227	32	1672565	AC119673.1
ENSG00000117280	1	205687114	205794588	259	25	1672565	RAB7L1
ENSG00000133065	1	205708221	205832876	316	35	1672565	SLC41A1
ENSG00000162877	1	205747150	205869260	287	33	1672565	PM20D1
ENSG00000174502	1	205832176	205962588	254	30	1672565	SLC26A9
ENSG00000196550	1	206086916	206205151	2	1	1672565	FAM72A
ENSG00000198049	1	206173976	206281639	24	3	1672565	AVPR1B
ENSG00000196533	1	206188872	206338647	28	5	1672565	C1orf186
ENSG00000196188	1	206267459	206382104	4	2	1672565	CTSE
ENSG00000163486	1	206466200	206687783	310	30	1672565	SRGAP2
ENSG00000143466	1	206593791	206720223	325	31	1672565	IKBKE
ENSG00000162888	1	206614449	206721061	260	29	1672565	C1orf147
ENSG00000136653	1	206630879	206812616	449	54	1672565	RASSF5
ENSG00000143486	1	206694620	206835904	306	35	1672565	EIF2D
ENSG00000143479	1	206758881	206907764	331	37	1672565	DYRK3
ENSG00000162889	1	206808289	206957628	303	34	1672565	MAPKAPK2
ENSG00000136634	1	206890947	206995839	234	41	1672565	IL10
ENSG00000142224	1	206922215	207066324	280	36	1672565	IL19
ENSG00000162891	1	206988699	207092568	166	23	1672565	IL20
ENSG00000162892	1	207020788	207127484	162	20	1672565	IL24
ENSG00000162894	1	207027731	207146592	192	20	1672565	FAIM3
ENSG00000162896	1	207051863	207169811	190	17	1672565	PIGR
ENSG00000162897	1	207081310	207193970	190	20	1672565	FCAMR
ENSG00000182795	1	207141866	207256101	158	20	1672565	C1orf116
ENSG00000180667	1	207167194	207276325	151	22	1672565	YOD1
ENSG00000123836	1	207172801	207304369	227	37	1672565	PFKFB2
ENSG00000123843	1	207212187	207323338	190	34	1672565	C4BPB
ENSG00000123838	1	207227607	207368317	223	36	1672565	C4BPA
ENSG00000196352	1	207444853	207584311	259	17	1672565	CD55
ENSG00000117322	1	207577575	207713240	245	26	1672565	CR2
ENSG00000203710	1	207619492	207863992	526	32	1672565	CR1
ENSG00000197721	1	207768458	207961761	535	27	1672565	CR1L
ENSG00000117335	1	207875402	208018858	301	18	1672565	CD46
ENSG00000174059	1	208007594	208134747	453	36	1672565	CD34
ENSG00000076356	1	208145587	208467665	807	75	1672565	PLXNA2
ENSG00000008118	1	209707062	209837283	397	51	1672565	CAMK1G
ENSG00000196878	1	209738215	209875811	418	60	1672565	LAMB3
ENSG00000123689	1	209798765	209899733	259	45	1672565	G0S2
ENSG00000117594	1	209809510	209958295	345	44	1672565	HSD11B1
ENSG00000009790	1	209879377	210005668	323	19	1672565	TRAF3IP3
ENSG00000162757	1	209905661	210007904	285	18	1672565	C1orf74
ENSG00000117595	1	209909036	210029465	339	19	1672565	IRF6
ENSG00000117597	1	209951352	210080910	349	22	1672565	DIEXF
ENSG00000143469	1	210061538	210387636	546	17	1672565	SYT14
ENSG00000082497	1	210356144	210469976	256	23	1672565	SERTAD4
ENSG00000054392	1	210451596	210899638	1528	105	1672565	HHAT
ENSG00000143473	1	210806555	211357457	1603	92	1672565	KCNH1
ENSG00000117625	1	211381719	211539727	405	27	1672565	RCOR3
ENSG00000082512	1	211449957	211598288	365	28	1672565	TRAF5
ENSG00000198570	1	211599864	211716259	467	41	1672565	RD3
ENSG00000170385	1	211694910	211802084	387	50	1672565	SLC30A1
ENSG00000117650	1	211786114	211898960	411	41	1672565	NEK2
ENSG00000123684	1	211866799	212054114	532	42	1672565	LPGAT1
ENSG00000143493	1	212063741	212258884	595	28	1672565	INTS7
ENSG00000143476	1	212158919	212330742	499	38	1672565	DTL
ENSG00000066027	1	212408879	212585200	377	24	1672565	PPP2R5A
ENSG00000065600	1	212487273	212638243	333	29	1672565	TMEM206
ENSG00000117691	1	212556229	212669714	315	32	1672565	NENF
ENSG00000162772	1	212688676	212844119	443	57	1672565	ATF3
ENSG00000162771	1	212747789	212850120	274	40	1672565	FAM71A
ENSG00000123685	1	212809760	212923327	327	35	1672565	BATF3
ENSG00000117697	1	212849495	213015124	593	26	1672565	NSL1
ENSG00000203705	1	212915170	213039968	501	18	1672565	TATDN3
ENSG00000185523	1	212953483	213070991	499	19	1672565	C1orf227
ENSG00000162769	1	212981597	213122705	553	24	1672565	FLVCR1
ENSG00000143494	1	213073862	213215379	320	39	1672565	VASH2
ENSG00000174606	1	213115524	213239168	211	26	1672565	ANGEL2
ENSG00000136643	1	213174589	213498116	359	21	1672565	RPS6KC1
ENSG00000117707	1	214106524	214264595	321	31	1672565	PROX1
ENSG00000143499	1	214404445	214560474	442	44	1672565	SMYD2
ENSG00000152104	1	214472039	214775792	999	70	1672565	PTPN14
ENSG00000117724	1	214726538	214887931	497	32	1672565	CENPF
ENSG00000082482	1	215129118	215460436	892	35	1672565	KCNK2
ENSG00000136636	1	215690735	215845149	92	22	1672565	KCTD3
ENSG00000042781	1	215746236	216646738	2138	143	1672565	USH2A
ENSG00000196482	1	216626588	217361097	2228	163	1672565	ESRRG
ENSG00000092978	1	217550334	217854424	721	56	1672565	GPATCH2
ENSG00000162814	1	217754666	218095038	964	45	1672565	SPATA17
ENSG00000067533	1	218408629	218561325	289	25	1672565	RRP15
ENSG00000092969	1	218469577	218667961	324	35	1672565	TGFB2
ENSG00000228208	1	218633438	218749320	264	28	1672565	C1orf143
ENSG00000143353	1	219297186	219436207	213	15	1672565	LYPLAL1
ENSG00000196660	1	219808769	220181989	1063	46	1672565	SLC30A10
ENSG00000136628	1	220091943	220270000	444	18	1672565	EPRS
ENSG00000162813	1	220180824	220313804	276	18	1672565	BPNT1
ENSG00000067704	1	220217444	220371380	242	23	1672565	IARS2
ENSG00000118873	1	220271635	220495796	449	30	1672565	RAB3GAP2
ENSG00000224867	1	220553286	220658023	259	21	1672565	AC096644.1
ENSG00000116141	1	220651568	220887803	444	30	1672565	MARK1
ENSG00000162817	1	220813187	220922499	309	19	1672565	C1orf115
ENSG00000117791	1	220871567	221008150	446	33	1672565	MARC2
ENSG00000186205	1	220910101	221037735	342	33	1672565	MARC1
ENSG00000136630	1	221001699	221108401	223	25	1672565	HLX
ENSG00000143507	1	221824766	221965518	465	45	1672565	DUSP10
ENSG00000143512	1	222645602	222771445	220	23	1672565	HHIPL2
ENSG00000143498	1	222681244	222813275	303	26	1672565	TAF1A
ENSG00000154305	1	222741428	222891354	276	20	1672565	MIA3
ENSG00000186063	1	222791355	222936552	235	21	1672565	AIDA
ENSG00000162819	1	222835895	222958538	214	21	1672565	BROX
ENSG00000197520	1	222860549	222974147	201	22	1672565	FAM177B
ENSG00000154309	1	222938406	223229337	791	49	1672565	DISP1
ENSG00000187554	1	223232748	223366624	339	17	1672565	TLR5
ENSG00000143502	1	223344161	223587544	424	28	1672565	SUSD4
ENSG00000178395	1	223516715	223618812	217	17	1672565	C1orf65
ENSG00000203697	1	223661349	223903436	570	42	1672565	CAPN8
ENSG00000162909	1	223839295	224013720	453	25	1672565	CAPN2
ENSG00000143514	1	223917601	224083674	318	16	1672565	TP53BP2
ENSG00000269358	1	224165760	224266371	179	18	1672565	AC138393.1
ENSG00000143756	1	224251789	224399749	405	19	1672565	FBXO28
ENSG00000143753	1	224313458	224431143	274	19	1672565	DEGS1
ENSG00000143748	1	224365036	224568089	386	30	1672565	NVL
ENSG00000143771	1	224494552	224617161	195	16	1672565	CNIH4
ENSG00000162923	1	224522845	224674735	243	16	1672565	WDR26
ENSG00000143786	1	224572362	224978251	876	44	1672565	CNIH3
ENSG00000185842	1	225033964	225636996	1581	34	1672565	DNAH14
ENSG00000143815	1	225539204	225666627	355	29	1672565	LBR
ENSG00000203691	1	225550404	225652040	258	22	1672565	AC092811.1
ENSG00000154380	1	225624537	225890844	590	30	1672565	ENAH
ENSG00000143742	1	225915531	226028168	350	38	1672565	SRP9
ENSG00000143819	1	225947794	226083260	435	43	1672565	EPHX1
ENSG00000196187	1	225983237	226120069	396	39	1672565	TMEM63A
ENSG00000243709	1	226023982	226149082	304	28	1672565	LEFTY1
ENSG00000255835	1	226024396	226161978	327	33	1672565	RP4-559A3.7
ENSG00000143811	1	226057578	226161978	231	32	1672565	PYCR2
ENSG00000143768	1	226074298	226179189	197	36	1672565	LEFTY2
ENSG00000143751	1	226120403	226237032	189	29	1672565	SDE2
ENSG00000163041	1	226199552	226309702	177	22	1672565	H3F3A
ENSG00000182827	1	226282380	226424431	249	29	1672565	ACBD3
ENSG00000185155	1	226361319	226464755	140	18	1672565	MIXL1
ENSG00000183814	1	226368850	226547570	254	25	1672565	LIN9
ENSG00000143799	1	226498392	226645780	392	25	1672565	PARP1
ENSG00000203685	1	226686501	226846915	361	50	1672565	C1orf95
ENSG00000143772	1	226769391	226977024	365	48	1672565	ITPKB
ENSG00000143801	1	227007885	227133806	259	24	1672565	PSEN2
ENSG00000163050	1	227035237	227225246	482	42	1672565	ADCK3
ENSG00000143776	1	227127566	227556175	1708	27	1672565	CDC42BPA
ENSG00000181450	1	227701244	227915144	464	19	1672565	ZNF678
ENSG00000143740	1	227866240	228018927	318	30	1672565	SNAP47
ENSG00000081692	1	227868126	227973112	218	26	1672565	JMJD4
ENSG00000185888	1	227953394	228084171	346	39	1672565	PRSS38
ENSG00000143816	1	228056357	228185599	286	24	1672565	WNT9A
ENSG00000154342	1	228144752	228298961	252	14	1672565	WNT3A
ENSG00000143761	1	228220361	228336912	133	17	1672565	ARF1
ENSG00000143793	1	228238427	228343112	106	16	1672565	C1orf35
ENSG00000162910	1	228244380	228347013	108	16	1672565	MRPL55
ENSG00000143774	1	228277663	228386685	127	15	1672565	GUK1
ENSG00000198835	1	228287553	228397527	126	15	1672565	GJC2
ENSG00000203684	1	228301787	228403213	124	12	1672565	IBA57-AS1
ENSG00000181873	1	228303516	228419958	166	11	1672565	IBA57
ENSG00000162913	1	228341207	228451365	214	11	1672565	C1orf145
ENSG00000154358	1	228345831	228616577	571	26	1672565	OBSCN
ENSG00000154370	1	228531374	228644541	214	23	1672565	TRIM11
ENSG00000162931	1	228545641	228654562	194	20	1672565	TRIM17
ENSG00000168148	1	228562546	228663026	164	18	1672565	HIST3H3
ENSG00000181218	1	228595065	228695560	166	23	1672565	HIST3H2A
ENSG00000196890	1	228595808	228696259	166	23	1672565	HIST3H2BB
ENSG00000168159	1	228624762	228733467	202	28	1672565	RNF187
ENSG00000116574	1	228820824	228932416	257	21	1672565	RHOU
ENSG00000177800	1	229335383	229437557	213	33	1672565	TMEM78
ENSG00000168118	1	229356822	229491641	286	26	1672565	RAB4A
ENSG00000213029	1	229390129	229491248	193	18	1672565	SPHAR
ENSG00000154429	1	229406758	229529041	239	26	1672565	CCSAP
ENSG00000143632	1	229516992	229619845	195	30	1672565	ACTA1
ENSG00000069248	1	229527045	229694103	292	24	1672565	NUP133
ENSG00000135776	1	229602329	229744442	223	15	1672565	ABCB10
ENSG00000135801	1	229678858	229811794	238	26	1672565	TAF5L
ENSG00000135763	1	229711981	229845946	303	20	1672565	URB2
ENSG00000143641	1	230143536	230467870	1079	88	1672565	GALNT2
ENSG00000177614	1	230407392	230611475	691	74	1672565	PGBD5
ENSG00000135775	1	230728235	230879728	560	45	1672565	COG2
ENSG00000135744	1	230788269	230900043	472	39	1672565	AGT
ENSG00000135773	1	230833130	230987749	602	53	1672565	CAPN9
ENSG00000119280	1	230922865	231055335	368	41	1672565	C1orf198
ENSG00000143643	1	230991989	231164621	543	30	1672565	TTC13
ENSG00000173409	1	231064727	231186341	403	34	1672565	ARV1
ENSG00000182118	1	231104704	231225992	425	45	1672565	FAM89A
ENSG00000119283	1	231247858	231407302	407	51	1672565	TRIM67
ENSG00000143633	1	231309509	231426933	294	31	1672565	C1orf131
ENSG00000116906	1	231326953	231463719	306	28	1672565	GNPAT
ENSG00000116903	1	231418480	231523598	228	15	1672565	EXOC8
ENSG00000010072	1	231422850	231540769	309	14	1672565	SPRTN
ENSG00000135766	1	231449497	231610790	438	13	1672565	EGLN1
ENSG00000116918	1	231614399	231752270	205	23	1672565	TSNAX
ENSG00000270106	1	231614399	232004990	741	72	1672565	TSNAX-DISC1
ENSG00000162946	1	231712561	232227018	1279	118	1672565	DISC1
ENSG00000116991	1	232483711	232747304	780	60	1672565	SIPA1L2
ENSG00000212916	1	232890643	232996092	375	26	1672565	MAP10
ENSG00000135778	1	233036351	233169628	340	25	1672565	NTPCR
ENSG00000135749	1	233069181	233481459	1272	77	1672565	PCNXL2
ENSG00000143674	1	233413514	233570894	474	38	1672565	MLK4
ENSG00000135750	1	233699750	233858258	494	70	1672565	KCNK1
ENSG00000183780	1	233990679	234510262	1643	132	1672565	SLC35F3
ENSG00000168275	1	234459202	234569795	294	35	1672565	COA6
ENSG00000059588	1	234477059	234664849	669	78	1672565	TARBP1
ENSG00000168264	1	234690015	234795271	337	41	1672565	IRF2BP2
ENSG00000173726	1	235222651	235342251	193	19	1672565	TOMM20
ENSG00000188739	1	235244498	235374772	234	20	1672565	RBM34
ENSG00000054267	1	235244949	235541534	585	18	1672565	ARID4B
ENSG00000152904	1	235440665	235557847	243	17	1672565	GGPS1
ENSG00000116957	1	235480675	235662283	386	22	1672565	TBCE
ENSG00000162885	1	235563238	235717781	408	21	1672565	B3GALNT2
ENSG00000168243	1	235660987	235864054	506	48	1672565	GNG4
ENSG00000143669	1	235774341	236096940	512	30	1672565	LYST
ENSG00000116962	1	236089130	236278462	448	47	1672565	NID1
ENSG00000077585	1	236255832	236435165	630	40	1672565	GPR137B
ENSG00000086619	1	236328855	236495319	585	20	1672565	ERO1LB
ENSG00000186197	1	236461562	236698214	884	72	1672565	EDARADD
ENSG00000116977	1	236631300	236766281	654	36	1672565	LGALS8
ENSG00000119285	1	236662305	236817804	765	27	1672565	HEATR1
ENSG00000077522	1	236799754	236977931	639	39	1672565	ACTN2
ENSG00000116984	1	236908610	237117281	544	28	1672565	MTR
ENSG00000244020	1	237117403	237217718	256	36	1672565	MT1HL1
ENSG00000198626	1	237155505	238047288	2711	220	1672565	RYR2
ENSG00000116996	1	237995705	238104094	327	30	1672565	ZP4
ENSG00000270188	1	238057024	238158575	275	21	1672565	MTRNR2L11
ENSG00000133019	1	239499865	240128750	1548	129	1672565	CHRM3
ENSG00000155816	1	240127648	240688489	1894	120	1672565	FMN2
ENSG00000268365	1	240579183	240693504	407	67	1672565	AL646016.1
ENSG00000180875	1	240602873	240825449	637	109	1672565	GREM2
ENSG00000182901	1	240881554	241570530	1994	162	1672565	RGS7
ENSG00000091483	1	241610903	241733061	320	31	1672565	FH
ENSG00000117009	1	241645434	241808944	386	57	1672565	KMO
ENSG00000054277	1	241703404	241890678	533	90	1672565	OPN3
ENSG00000203668	1	241742155	241849232	262	43	1672565	CHML
ENSG00000162843	1	241765580	242015435	738	69	1672565	WDR64
ENSG00000174371	1	241961269	242108450	497	59	1672565	EXO1
ENSG00000197769	1	242108792	242212375	466	52	1672565	MAP1LC3C
ENSG00000180287	1	242196288	242737998	1694	123	1672565	PLD5
ENSG00000143702	1	243237730	243468650	223	18	1672565	CEP170
ENSG00000269795	1	243338058	243445911	134	12	1672565	AC092782.1
ENSG00000054282	1	243369320	243713394	521	34	1672565	SDCCAG8
ENSG00000117020	1	243601535	244064381	618	28	1672565	AKT3
ENSG00000179456	1	244164585	244270778	286	54	1672565	ZBTB18
ENSG00000268146	1	244177632	244281211	258	47	1672565	AL590483.1
ENSG00000173728	1	244465937	244602965	477	55	1672565	C1orf100
ENSG00000035687	1	244521796	244665436	330	34	1672565	ADSS
ENSG00000179397	1	244567679	244854479	703	47	1672565	C1orf101
ENSG00000121644	1	244766237	244922335	365	37	1672565	DESI2
ENSG00000203667	1	244948624	245058359	225	35	1672565	COX20
ENSG00000153187	1	244964468	245077844	243	38	1672565	HNRNPU
ENSG00000272195	1	245082652	245184390	268	25	1672565	RP11-156E8.1
ENSG00000203666	1	245083007	245340466	654	51	1672565	EFCAB2
ENSG00000162849	1	245268287	245922733	2148	206	1672565	KIF26B
ENSG00000185420	1	245862642	246720614	3149	111	1672565	SMYD3
ENSG00000162851	1	246653862	246779626	436	36	1672565	TFB2M
ENSG00000162852	1	246679746	246881886	626	52	1672565	CNST
ENSG00000143653	1	246837349	246981439	467	31	1672565	SCCPDH
ENSG00000153207	1	246952400	247145280	449	40	1672565	AHCTF1
ENSG00000197472	1	247058849	247221395	501	29	1672565	ZNF695
ENSG00000135747	1	247058849	247292113	774	34	1672565	ZNF670
ENSG00000188295	1	247213264	247317674	387	31	1672565	ZNF669
ENSG00000221953	1	247223462	247325719	373	30	1672565	C1orf229
ENSG00000196418	1	247235277	247385318	536	38	1672565	ZNF124
ENSG00000162714	1	247410714	247545148	361	39	1672565	ZNF496
ENSG00000162711	1	247529458	247662410	586	61	1672565	NLRP3
ENSG00000177535	1	247564255	247665308	425	48	1672565	OR2B11
ENSG00000169224	1	247620360	247790992	529	47	1672565	GCSAML
ENSG00000196242	1	247643434	247747141	270	36	1672565	OR2C3
ENSG00000177489	1	247701662	247802615	303	38	1672565	OR2G2
ENSG00000177476	1	247718856	247819838	341	37	1672565	OR2G3
ENSG00000197437	1	247785320	247886365	419	22	1672565	OR13G1
ENSG00000169214	1	247825045	247926105	328	25	1672565	OR6F1
ENSG00000241128	1	247836401	247937345	305	23	1672565	OR14A2
ENSG00000153230	1	247851917	247952861	306	17	1672565	OR14K1
ENSG00000221888	1	247870676	247971982	357	16	1672565	OR1C1
ENSG00000196772	1	247928102	248029031	476	20	1672565	OR14A16
ENSG00000197591	1	247954199	248055254	436	29	1672565	OR11L1
ENSG00000162722	1	247970501	248091507	520	38	1672565	TRIM58
ENSG00000238243	1	247981277	248110449	518	40	1672565	OR2W3
ENSG00000177462	1	248034320	248135258	390	33	1672565	OR2T8
ENSG00000177275	1	248047071	248148057	390	32	1672565	OR2AJ1
ENSG00000196071	1	248050493	248314224	676	40	1672565	OR2L13
ENSG00000196936	1	248062160	248163098	351	28	1672565	OR2L8
ENSG00000187080	1	248078535	248179641	294	22	1672565	OR2AK2
[truncated: 17,200 more rows]

## Sheet: Supplementary Table 04
Table S4.The candidate pleiotropic genes identified between MAGMA and ones annotated by CPASSOC
Symbol	Gene	CHR	Start	Stop	NSNPS	N	P
ACAD10	ENSG00000111271	12	112073857	112244903	119	1672565	9.7808e-07
ACSS2	ENSG00000131069	20	33409949	33565769	226	1672565	0.00015664
ALDH2	ENSG00000111275	12	112154691	112297782	159	1672565	3.8397e-06
ARMS2	ENSG00000254636	10	124164169	124266868	283	1672565	1.9013e-06
ATG9B	ENSG00000181652	7	150659297	150771586	229	1672565	1.5309e-06
ATP5B	ENSG00000110955	12	56981959	57089798	150	1672565	0.00039033
ATP5E	ENSG00000124172	20	57550522	57657437	198	1672565	0.03563
ATXN2	ENSG00000204842	12	111840018	112087480	170	1672565	4.0142e-08
AUTS2	ENSG00000158321	7	69013905	70308054	2410	1672565	2.6779e-10
BAZ2A	ENSG00000076108	12	56939380	57080600	193	1672565	0.00041065
BGLAP	ENSG00000242252	1	156161753	156263112	195	1672565	1.8173e-08
BRAP	ENSG00000089234	12	112029950	112173790	93	1672565	4.5766e-07
BZRAP1	ENSG00000005379	17	56328592	56456152	263	1672565	2.0352e-07
CACNB2	ENSG00000165995	10	18379606	18880798	1666	1672565	3.5228e-05
CARF	ENSG00000138380	2	203726937	203901786	283	1672565	2.0532e-09
CASZ1	ENSG00000130940	1	10646661	10906707	625	1672565	5.9831e-06
CDK6	ENSG00000105810	7	92184235	92515908	381	1672565	8.6572e-07
CDKN1A	ENSG00000124762	6	36594305	36705116	364	1672565	6.4156e-05
CDKN2A	ENSG00000147889	9	21917751	22045300	207	1672565	1.4976e-05
CDKN2B	ENSG00000147883	9	21952902	22059362	178	1672565	3.8941e-06
CUX2	ENSG00000111249	12	111421828	111838358	451	1672565	1.0286e-06
CYP20A1	ENSG00000119004	2	204053663	204213009	219	1672565	0.014006
EDEM2	ENSG00000088298	20	33653167	33915928	506	1672565	1.8216e-08
ERP29	ENSG00000089248	12	112401120	112511255	127	1672565	1.1761e-05
F11	ENSG00000088926	4	187137099	187260835	334	1672565	1.2466e-08
FAM117B	ENSG00000138439	2	203449901	203684480	253	1672565	3.0479e-07
FES	ENSG00000182511	15	91376925	91489006	263	1672565	1.6484e-05
FGA	ENSG00000171560	4	155454278	155561918	202	1672565	1.2394e-09
FGB	ENSG00000171564	4	155434108	155542238	225	1672565	2.3692e-11
FGG	ENSG00000171557	4	155475286	155584119	186	1672565	7.8287e-12
FOXF2	ENSG00000137273	6	1340069	1445832	419	1672565	3.0628e-13
FOXQ1	ENSG00000164379	6	1262675	1364992	389	1672565	5.2009e-13
FTO	ENSG00000140718	16	53687875	54205853	1311	1672565	1.1162e-11
FURIN	ENSG00000140564	15	91361822	91476688	307	1672565	5.9284e-05
GABRB1	ENSG00000163288	4	46945740	47478461	1169	1672565	1.9667e-05
GAPVD1	ENSG00000165219	9	127974073	128179486	314	1672565	2.5614e-08
GIPR	ENSG00000010310	19	46121502	46236982	259	1672565	3.9081e-06
GRK5	ENSG00000198873	10	120917101	121265131	950	1672565	0.0060227
GSS	ENSG00000100983	20	33466236	33593620	205	1672565	5.0889e-05
HECTD4	ENSG00000173064	12	112547992	112869896	276	1672565	6.0356e-05
HSF5	ENSG00000176160	17	56447528	56615745	216	1672565	1.0117e-06
HSPA5	ENSG00000044574	9	127947132	128053609	151	1672565	0.00019154
HTRA1	ENSG00000166033	10	124171041	124324424	514	1672565	3.8786e-05
ICA1L	ENSG00000163596	2	203590690	203786708	315	1672565	1.4922e-09
IL18R1	ENSG00000115604	2	102877989	103065218	602	1672565	0.021533
IL18RAP	ENSG00000115607	2	102985149	103119025	512	1672565	0.030946
KLKB1	ENSG00000164344	4	187080133	187229625	432	1672565	1.375e-07
LDLR	ENSG00000130164	19	11150038	11294492	433	1672565	4.3606e-08
LRAT	ENSG00000121207	4	155498097	155724270	362	1672565	1.4251e-06
MAN2A2	ENSG00000196547	15	91395448	91515814	302	1672565	0.00043552
MAPKAPK5	ENSG00000089022	12	112229782	112384343	232	1672565	1.7648e-05
MMP24	ENSG00000125966	20	33764457	33914801	254	1672565	0.00038757
MMP3	ENSG00000149968	11	102656532	102764534	300	1672565	5.7562e-07
MPO	ENSG00000005381	17	56297217	56408296	216	1672565	2.8251e-06
MTMR4	ENSG00000108389	17	56516898	56645266	179	1672565	2.854e-06
MYH7B	ENSG00000078814	20	33513206	33640240	237	1672565	1.0846e-07
NAA25	ENSG00000111300	12	112414500	112596826	176	1672565	1.4487e-05
NACA	ENSG00000196531	12	57056212	57175412	137	1672565	0.0018232
NBEAL1	ENSG00000144426	2	203829602	204141101	428	1672565	1.0899e-06
NOS3	ENSG00000164867	7	150638083	150761676	241	1672565	1.9536e-06
NRXN3	ENSG00000021645	14	78658734	80380762	3795	1672565	1.5618e-05
PAQR6	ENSG00000160781	1	156163206	156267881	199	1672565	3.4647e-08
PLRG1	ENSG00000171566	4	155406158	155521587	319	1672565	5.1406e-10
PMF1	ENSG00000160783	1	156132784	156262874	251	1672565	8.3097e-09
PMF1-BGLAP	ENSG00000260238	1	156132773	156263123	252	1672565	3.5586e-09
PRIM1	ENSG00000198056	12	57075380	57196157	150	1672565	0.003414
PROCR	ENSG00000101000	20	33709876	33815165	224	1672565	1.7048e-07
PTGES3	ENSG00000110958	12	57007127	57132159	175	1672565	0.00063352
PTPN11	ENSG00000179295	12	112806155	112997717	187	1672565	5.9475e-05
QPCTL	ENSG00000011478	19	46145741	46257247	229	1672565	5.7957e-06
RAI1	ENSG00000108557	17	17534787	17764767	339	1672565	4.9295e-05
RNF43	ENSG00000108375	17	56379861	56544956	272	1672565	1.7645e-07
RP11-145E5.5	ENSG00000264545	9	21752635	22082985	651	1672565	0.00030524
RP11-162P23.2	ENSG00000257767	12	112141694	112279222	119	1672565	2.6022e-06
RPH3A	ENSG00000089169	12	112958184	113386686	757	1672565	0.00013928
RPL6	ENSG00000089009	12	112792994	112906642	97	1672565	8.0348e-06
SEMA4A	ENSG00000196189	1	156067157	156197543	252	1672565	5.6805e-09
SEPT4	ENSG00000108387	17	56547611	56668179	173	1672565	3.9086e-06
SH2B3	ENSG00000111252	12	111793752	111939427	124	1672565	3.3348e-08
SLC25A44	ENSG00000160785	1	156113880	156232587	216	1672565	1.5311e-09
SLC44A2	ENSG00000129353	19	10663133	10805235	324	1672565	7.2422e-05
SLC9A4	ENSG00000180251	2	103039762	103200431	546	1672565	0.00031347
SNRPD2	ENSG00000125743	19	46140712	46245827	228	1672565	7.076e-06
SREBF1	ENSG00000072310	17	17663713	17790325	131	1672565	1.1558e-05
SUPT4H1	ENSG00000213246	17	56372539	56480454	221	1672565	1.61e-07
TMEM108	ENSG00000144868	3	132707235	133166636	1353	1672565	0.039264
TMEM116	ENSG00000198270	12	112319086	112500970	232	1672565	1.433e-05
TRAFD1	ENSG00000135148	12	112513305	112641407	102	1672565	0.00010206
TRPC4AP	ENSG00000100991	20	33540207	33730674	435	1672565	1.9166e-08
TUBB1	ENSG00000101162	20	57544309	57651709	204	1672565	0.015752
WDR12	ENSG00000138442	2	203689505	203929521	388	1672565	8.4993e-10
ZNF474	ENSG00000164185	5	121415208	121565312	210	1672565	1.6395e-06

## Sheet: Supplementary Table 05
Table S5.The significant candidate pleiotropic genes identified between MAGMA and ones annotated by CPASSOC
Symbol	Gene	CHR	Start	Stop	NSNPS	N	P
FOXF2	ENSG00000137273	6	1340069	1445832	419	1672565	3.0628e-13
FOXQ1	ENSG00000164379	6	1262675	1364992	389	1672565	5.2009e-13
FGG	ENSG00000171557	4	155475286	155584119	186	1672565	7.8287e-12
FTO	ENSG00000140718	16	53687875	54205853	1311	1672565	1.1162e-11
FGB	ENSG00000171564	4	155434108	155542238	225	1672565	2.3692e-11
AUTS2	ENSG00000158321	7	69013905	70308054	2410	1672565	2.6779e-10
PLRG1	ENSG00000171566	4	155406158	155521587	319	1672565	5.1406e-10
WDR12	ENSG00000138442	2	203689505	203929521	388	1672565	8.4993e-10
FGA	ENSG00000171560	4	155454278	155561918	202	1672565	1.2394e-09
ICA1L	ENSG00000163596	2	203590690	203786708	315	1672565	1.4922e-09
SLC25A44	ENSG00000160785	1	156113880	156232587	216	1672565	1.5311e-09
CARF	ENSG00000138380	2	203726937	203901786	283	1672565	2.0532e-09
PMF1-BGLAP	ENSG00000260238	1	156132773	156263123	252	1672565	3.5586e-09
SEMA4A	ENSG00000196189	1	156067157	156197543	252	1672565	5.6805e-09
PMF1	ENSG00000160783	1	156132784	156262874	251	1672565	8.3097e-09
F11	ENSG00000088926	4	187137099	187260835	334	1672565	1.2466e-08
BGLAP	ENSG00000242252	1	156161753	156263112	195	1672565	1.8173e-08
EDEM2	ENSG00000088298	20	33653167	33915928	506	1672565	1.8216e-08
TRPC4AP	ENSG00000100991	20	33540207	33730674	435	1672565	1.9166e-08
GAPVD1	ENSG00000165219	9	127974073	128179486	314	1672565	2.5614e-08
SH2B3	ENSG00000111252	12	111793752	111939427	124	1672565	3.3348e-08
PAQR6	ENSG00000160781	1	156163206	156267881	199	1672565	3.4647e-08
ATXN2	ENSG00000204842	12	111840018	112087480	170	1672565	4.0142e-08
LDLR	ENSG00000130164	19	11150038	11294492	433	1672565	4.3606e-08
MYH7B	ENSG00000078814	20	33513206	33640240	237	1672565	1.0846e-07
KLKB1	ENSG00000164344	4	187080133	187229625	432	1672565	1.375e-07
SUPT4H1	ENSG00000213246	17	56372539	56480454	221	1672565	1.61e-07
PROCR	ENSG00000101000	20	33709876	33815165	224	1672565	1.7048e-07
RNF43	ENSG00000108375	17	56379861	56544956	272	1672565	1.7645e-07
BZRAP1	ENSG00000005379	17	56328592	56456152	263	1672565	2.0352e-07
FAM117B	ENSG00000138439	2	203449901	203684480	253	1672565	3.0479e-07
BRAP	ENSG00000089234	12	112029950	112173790	93	1672565	4.5766e-07
MMP3	ENSG00000149968	11	102656532	102764534	300	1672565	5.7562e-07
CDK6	ENSG00000105810	7	92184235	92515908	381	1672565	8.6572e-07
ACAD10	ENSG00000111271	12	112073857	112244903	119	1672565	9.7808e-07
HSF5	ENSG00000176160	17	56447528	56615745	216	1672565	1.0117e-06
CUX2	ENSG00000111249	12	111421828	111838358	451	1672565	1.0286e-06
NBEAL1	ENSG00000144426	2	203829602	204141101	428	1672565	1.0899e-06
LRAT	ENSG00000121207	4	155498097	155724270	362	1672565	1.4251e-06
ATG9B	ENSG00000181652	7	150659297	150771586	229	1672565	1.5309e-06
ZNF474	ENSG00000164185	5	121415208	121565312	210	1672565	1.6395e-06
ARMS2	ENSG00000254636	10	124164169	124266868	283	1672565	1.9013e-06
NOS3	ENSG00000164867	7	150638083	150761676	241	1672565	1.9536e-06
RP11-162P23.2	ENSG00000257767	12	112141694	112279222	119	1672565	2.6022e-06
MPO	ENSG00000005381	17	56297217	56408296	216	1672565	2.8251e-06
MTMR4	ENSG00000108389	17	56516898	56645266	179	1672565	2.854e-06
ALDH2	ENSG00000111275	12	112154691	112297782	159	1672565	3.8397e-06
CDKN2B	ENSG00000147883	9	21952902	22059362	178	1672565	3.8941e-06
GIPR	ENSG00000010310	19	46121502	46236982	259	1672565	3.9081e-06
SEPT4	ENSG00000108387	17	56547611	56668179	173	1672565	3.9086e-06
AC011475.1	ENSG00000226104	19	10701715	10802093	185	1672565	4.0328e-06
QPCTL	ENSG00000011478	19	46145741	46257247	229	1672565	5.7957e-06
CASZ1	ENSG00000130940	1	10646661	10906707	625	1672565	5.9831e-06
SNRPD2	ENSG00000125743	19	46140712	46245827	228	1672565	7.076e-06
RPL6	ENSG00000089009	12	112792994	112906642	97	1672565	8.0348e-06
SREBF1	ENSG00000072310	17	17663713	17790325	131	1672565	1.1558e-05
ERP29	ENSG00000089248	12	112401120	112511255	127	1672565	1.1761e-05
TMEM116	ENSG00000198270	12	112319086	112500970	232	1672565	1.433e-05
NAA25	ENSG00000111300	12	112414500	112596826	176	1672565	1.4487e-05
CDKN2A	ENSG00000147889	9	21917751	22045300	207	1672565	1.4976e-05
NRXN3	ENSG00000021645	14	78658734	80380762	3795	1672565	1.5618e-05
FES	ENSG00000182511	15	91376925	91489006	263	1672565	1.6484e-05
MAPKAPK5	ENSG00000089022	12	112229782	112384343	232	1672565	1.7648e-05
GABRB1	ENSG00000163288	4	46945740	47478461	1169	1672565	1.9667e-05
CACNB2	ENSG00000165995	10	18379606	18880798	1666	1672565	3.5228e-05
HTRA1	ENSG00000166033	10	124171041	124324424	514	1672565	3.8786e-05
RAI1	ENSG00000108557	17	17534787	17764767	339	1672565	4.9295e-05
GSS	ENSG00000100983	20	33466236	33593620	205	1672565	5.0889e-05
FURIN	ENSG00000140564	15	91361822	91476688	307	1672565	5.9284e-05
PTPN11	ENSG00000179295	12	112806155	112997717	187	1672565	5.9475e-05
HECTD4	ENSG00000173064	12	112547992	112869896	276	1672565	6.0356e-05
CDKN1A	ENSG00000124762	6	36594305	36705116	364	1672565	6.4156e-05
SLC44A2	ENSG00000129353	19	10663133	10805235	324	1672565	7.2422e-05
TRAFD1	ENSG00000135148	12	112513305	112641407	102	1672565	0.00010206
RPH3A	ENSG00000089169	12	112958184	113386686	757	1672565	0.00013928
ACSS2	ENSG00000131069	20	33409949	33565769	226	1672565	0.00015664
HSPA5	ENSG00000044574	9	127947132	128053609	151	1672565	0.00019154
RP11-145E5.5	ENSG00000264545	9	21752635	22082985	651	1672565	0.00030524
SLC9A4	ENSG00000180251	2	103039762	103200431	546	1672565	0.00031347
MMP24	ENSG00000125966	20	33764457	33914801	254	1672565	0.00038757
ATP5B	ENSG00000110955	12	56981959	57089798	150	1672565	0.00039033
BAZ2A	ENSG00000076108	12	56939380	57080600	193	1672565	0.00041065
MAN2A2	ENSG00000196547	15	91395448	91515814	302	1672565	0.00043552
